# Supplementary material for: Nano CoFe2O4supported antimony(iii) as an efficient and recyclable catalyst for one-pot three-component synthesis of multisubstituted pyrroles
Source: Royal Society of Chemistry journal article supplement (doi:10.1039/c3ra47855f), 2014-01-01

# Nano CoFe<sub>2</sub>O<sub>4</sub> supported antimony(III) as an efficient and recyclable catalyst for one-pot three-component synthesis of multisubstituted pyrroles

Bao-Le Li, Hai-Chuan Hu, Li-Ping Mo and Zhan-Hui Zhang\*

*College of Chemistry and Material Science, Hebei Normal University, Shijiazhuang 050024, China*

*Fax: +86 311 80787431, E-mail: zhanhui@ mail.nankai.edu.cn*

## Supporting Information

**General Information.** All solvents and chemicals were obtained commercially and were used as received. X-ray diffraction analysis was carried out using a PANalytical X'Pert Pro X-ray diffractometer. Surface morphology and particle size were studied using a Hitachi S-4800 SEM instrument. Transmission electron microscope (TEM) observation was performed using Hitachi H-7650 microscope at 80 KV. Elemental compositions were determined with a Hitachi S-4800 scanning electron microscope equipped with an INCA 350 energy dispersive spectrometer (SEM-EDS) presenting a 133 eV resolution at 5.9 keV. The ICP-MS analyses were carried out with an X Series 2 spectrometer. Melting points were measured on an X-4 digital melting point apparatus are uncorrected. IR spectra were obtained as KBr pellets or as liquid films on KBr pellets with a Bruker-TENSOR 27 spectrometer. <sup>1</sup>H NMR (500 MHz) and <sup>13</sup>C NMR (125 MHz) spectra were recorded on Bruker DRX-500 spectrometer using CDCl<sub>3</sub> as the solvent and TMS as an internal standard. Elemental analyses were determined on a Vario EL III CHNOS elemental analyzer.

Chemical structure of 1-phenyl-2-methyl-3-phenyl-4-acetylpyrrole:

CC(=O)c1cc(Cc2ccccc2)c(C)c1C3=CC=CC=C3

<sup>1</sup>H NMR spectrum (CDCl<sub>3</sub>) showing peaks in the aromatic region (6.7-7.5 ppm), a methyl singlet (2.4 ppm), and an acetyl singlet (2.1 ppm). Integration values are provided for each group of peaks.

| Chemical Shift (ppm)                                                                                    | Integration                                                                              |
|---------------------------------------------------------------------------------------------------------|------------------------------------------------------------------------------------------|
| 7.507, 7.493, 7.477, 7.441, 7.426, 7.412, 7.392, 7.384, 7.345, 7.331, 7.325, 7.316, 7.308, 7.260, 6.679 | 1.00, 1.00, 1.00, 1.00, 1.00, 1.00, 1.00, 1.00, 1.00, 1.00, 1.00, 1.00, 1.00, 1.00, 1.00 |
| 2.417                                                                                                   | 3.00                                                                                     |
| 2.085                                                                                                   | 3.01                                                                                     |

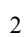

$^1\text{H}$  NMR and  $^{13}\text{C}$  NMR of compound **4b**

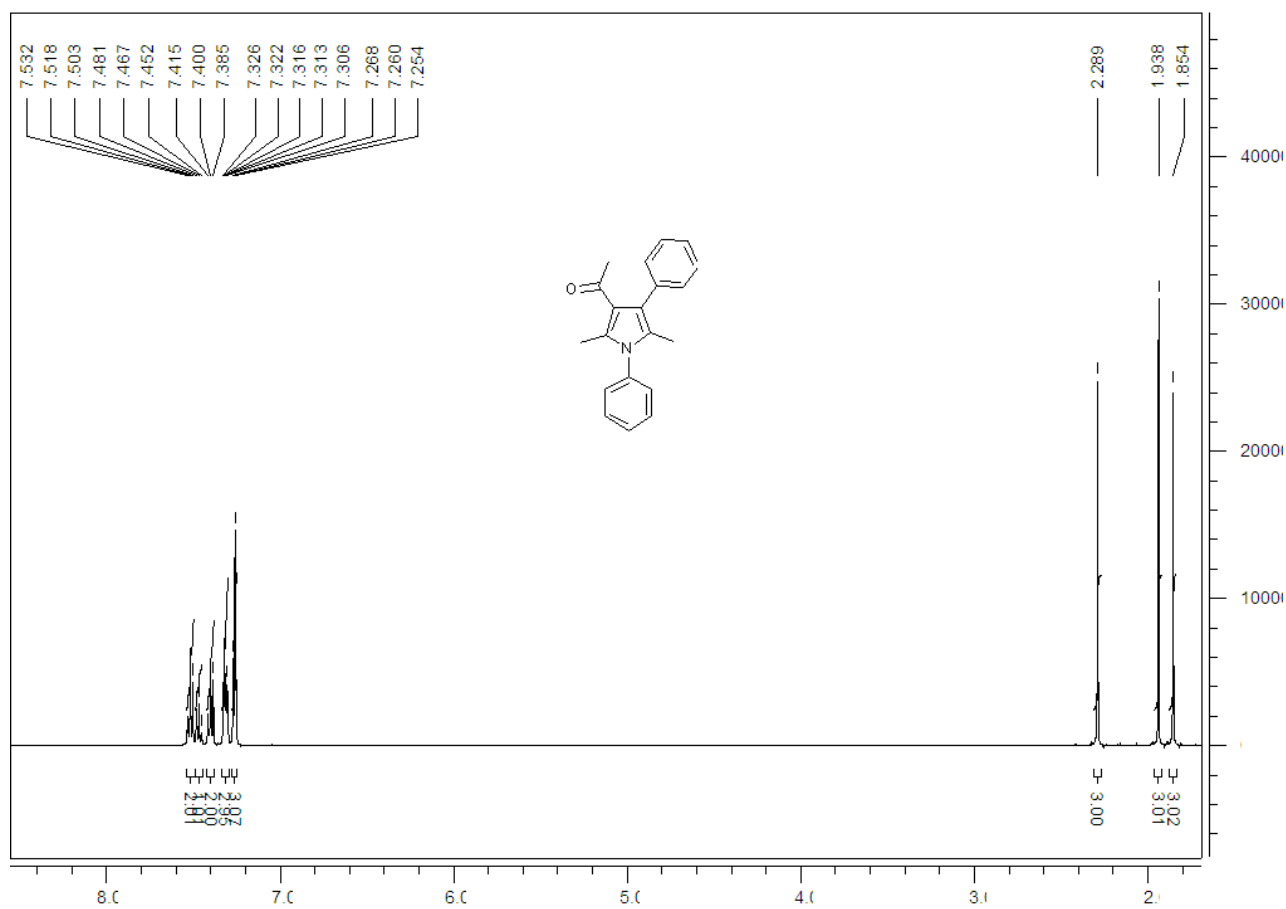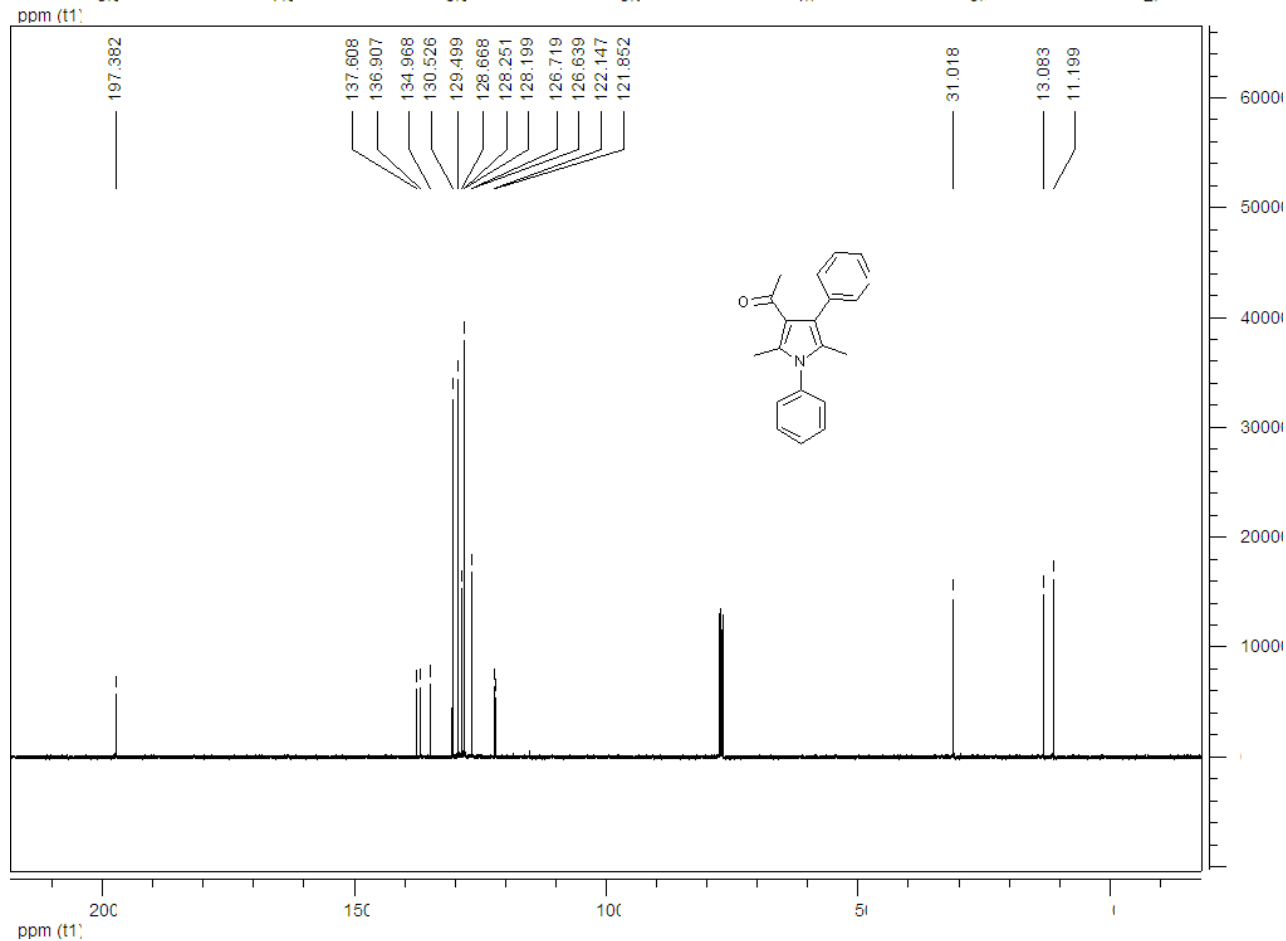

CC(=O)c1c(C)c(C2=CC=CC=C2)n(c3ccccc3)c1C4=CC=C(C)C=C4

Chemical structure of 1-phenyl-2-methyl-3-(4-methylphenyl)-4-oxo-1H-indole-5-carboxamide is shown above the spectrum.

The spectrum displays peaks in the aromatic region (7.183-7.524 ppm) and aliphatic region (1.847-2.392 ppm). Integration values are provided for the main signals.

| Chemical Shift (ppm) | Integration |
|----------------------|-------------|
| 7.524                | 1.09        |
| 7.509                | 1.06        |
| 7.494                | 1.06        |
| 7.471                | 1.06        |
| 7.457                | 1.06        |
| 7.442                | 1.06        |
| 7.260                | 1.06        |
| 7.245                | 1.06        |
| 7.218                | 1.06        |
| 7.200                | 1.06        |
| 7.183                | 1.06        |
| 2.392                | 3.02        |
| 2.285                | 3.00        |
| 1.952                | 3.01        |
| 1.847                | 3.02        |

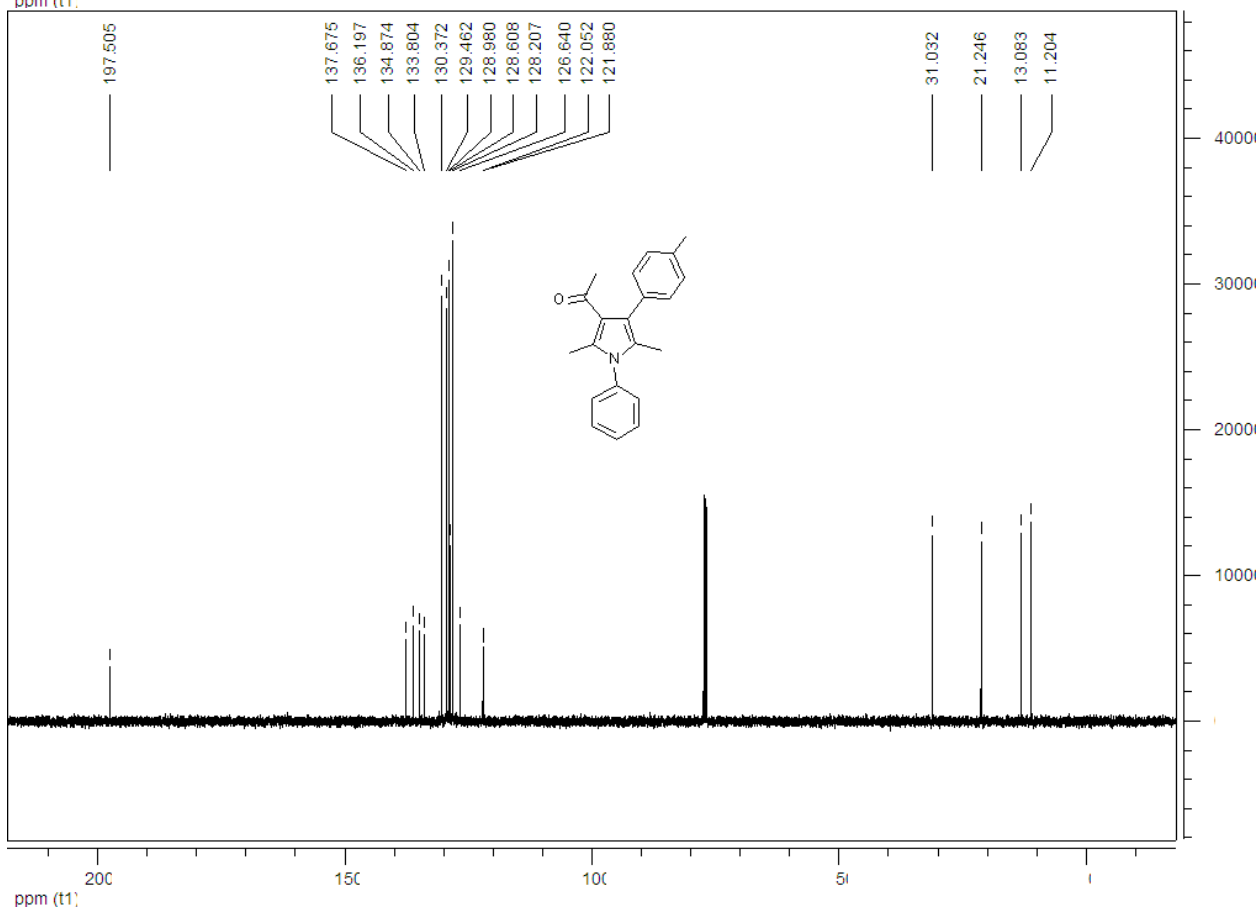

$^1\text{H}$  NMR and  $^{13}\text{C}$  NMR of compound **4d**

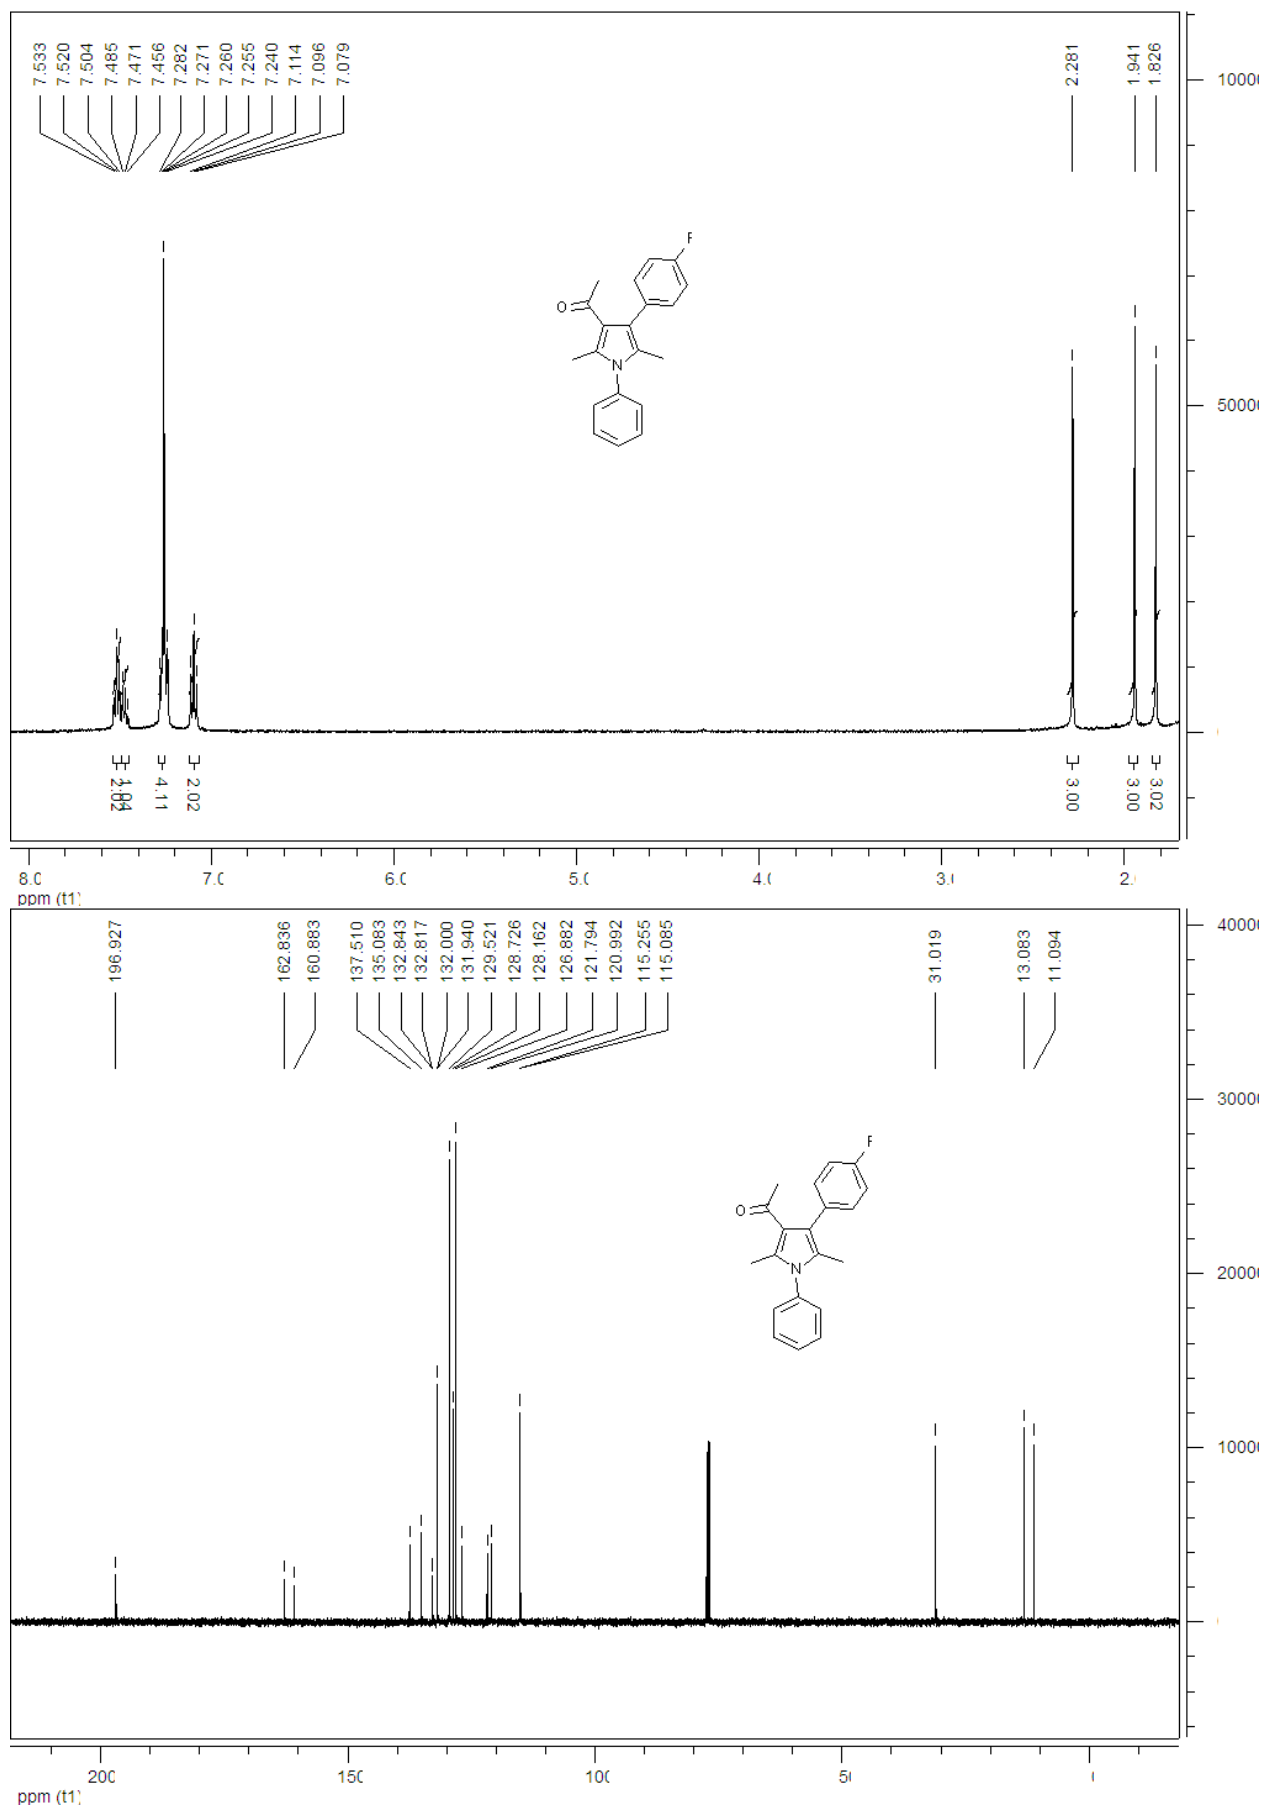

$^1\text{H}$  NMR and  $^{13}\text{C}$  NMR of compound **4e**

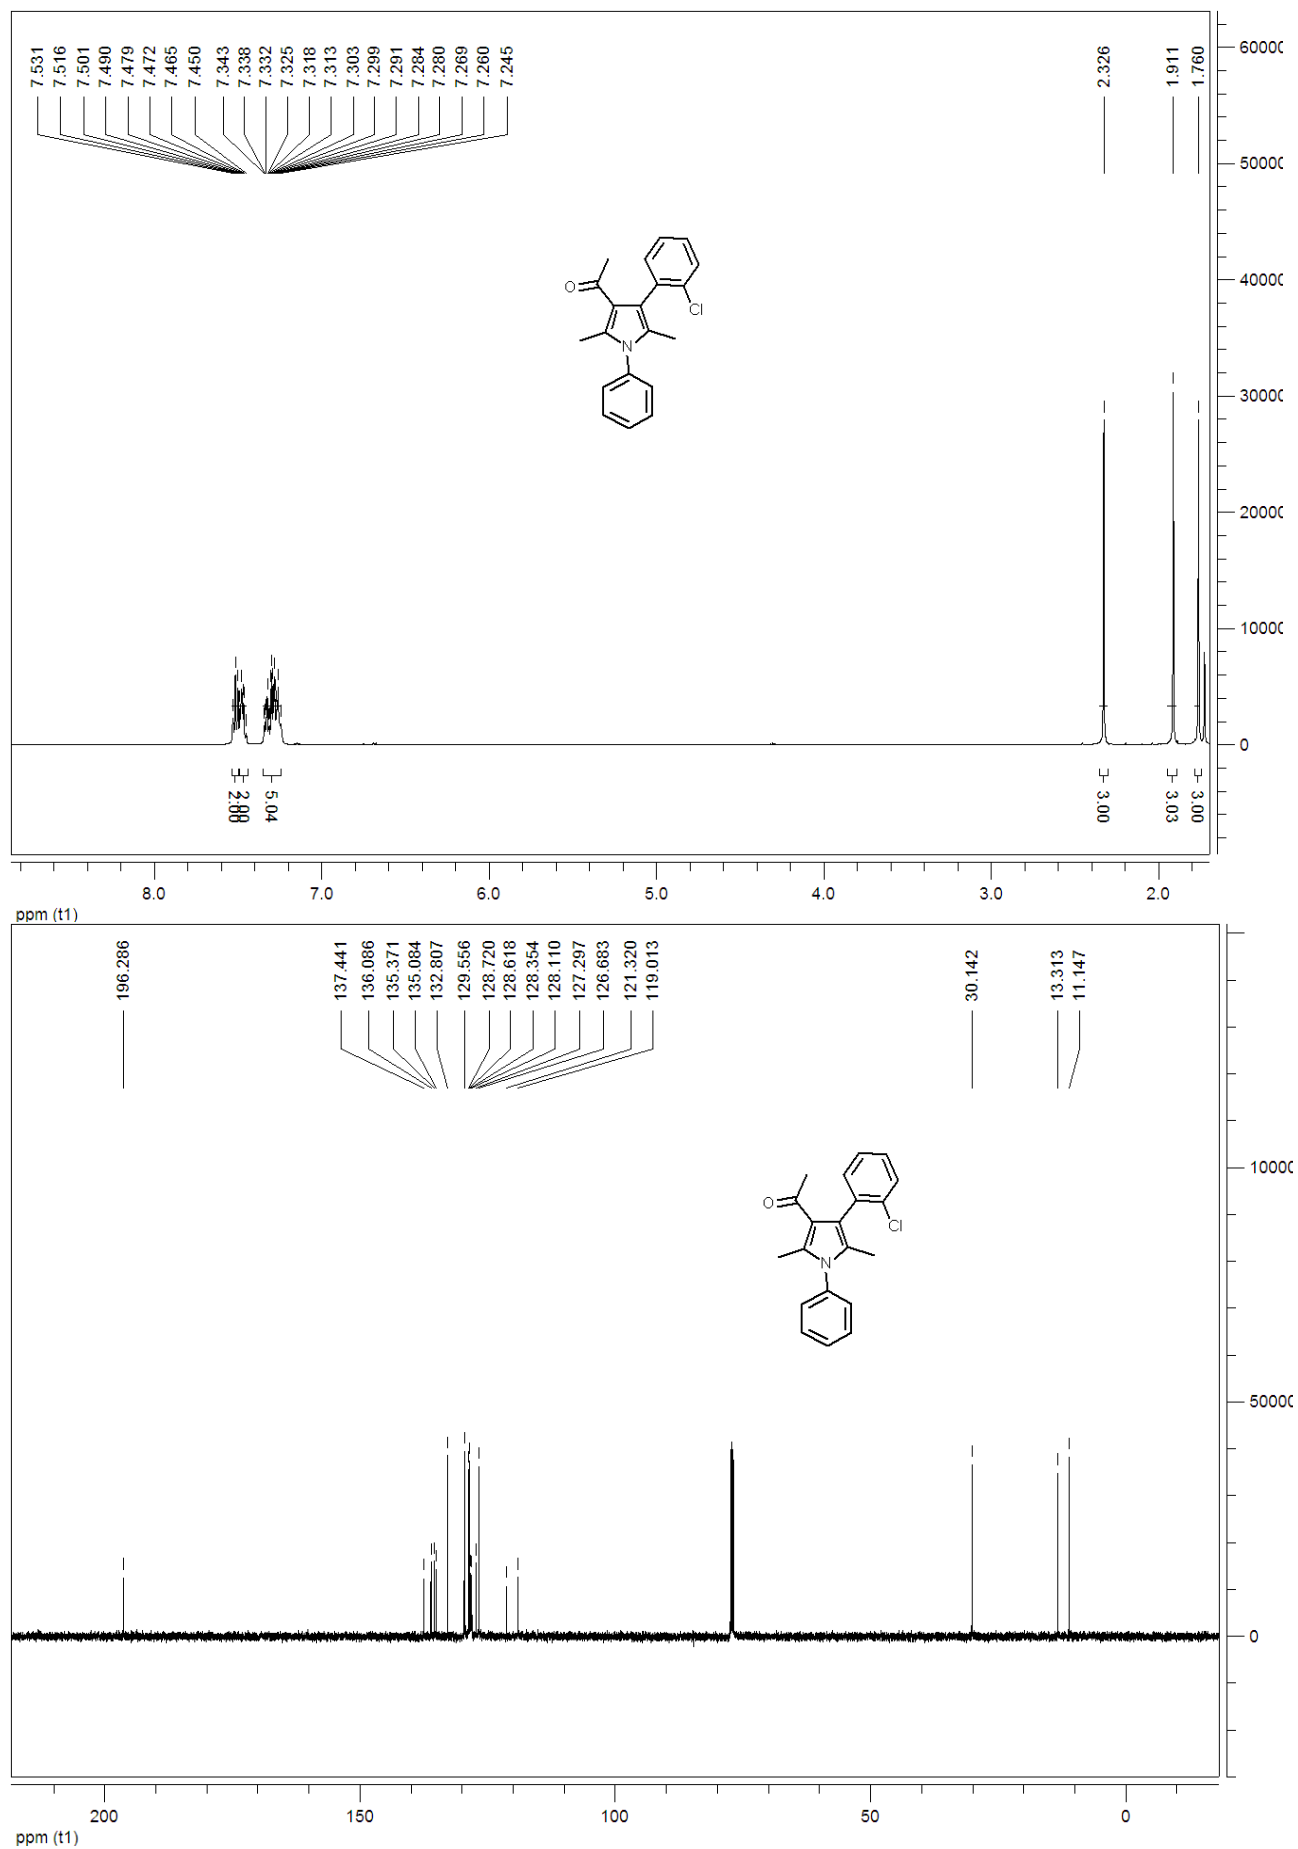

$^1\text{H}$  NMR and  $^{13}\text{C}$  NMR of compound **4f**

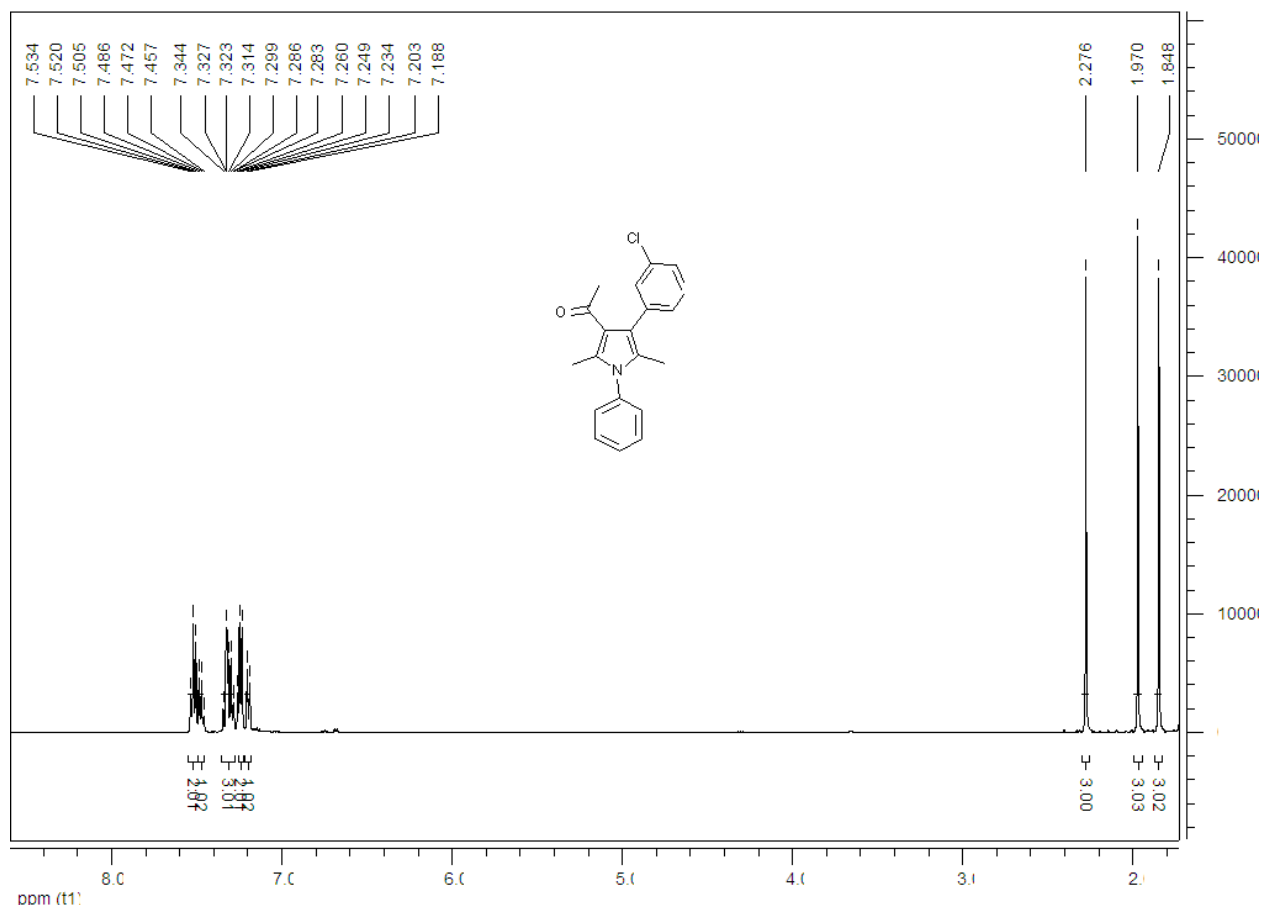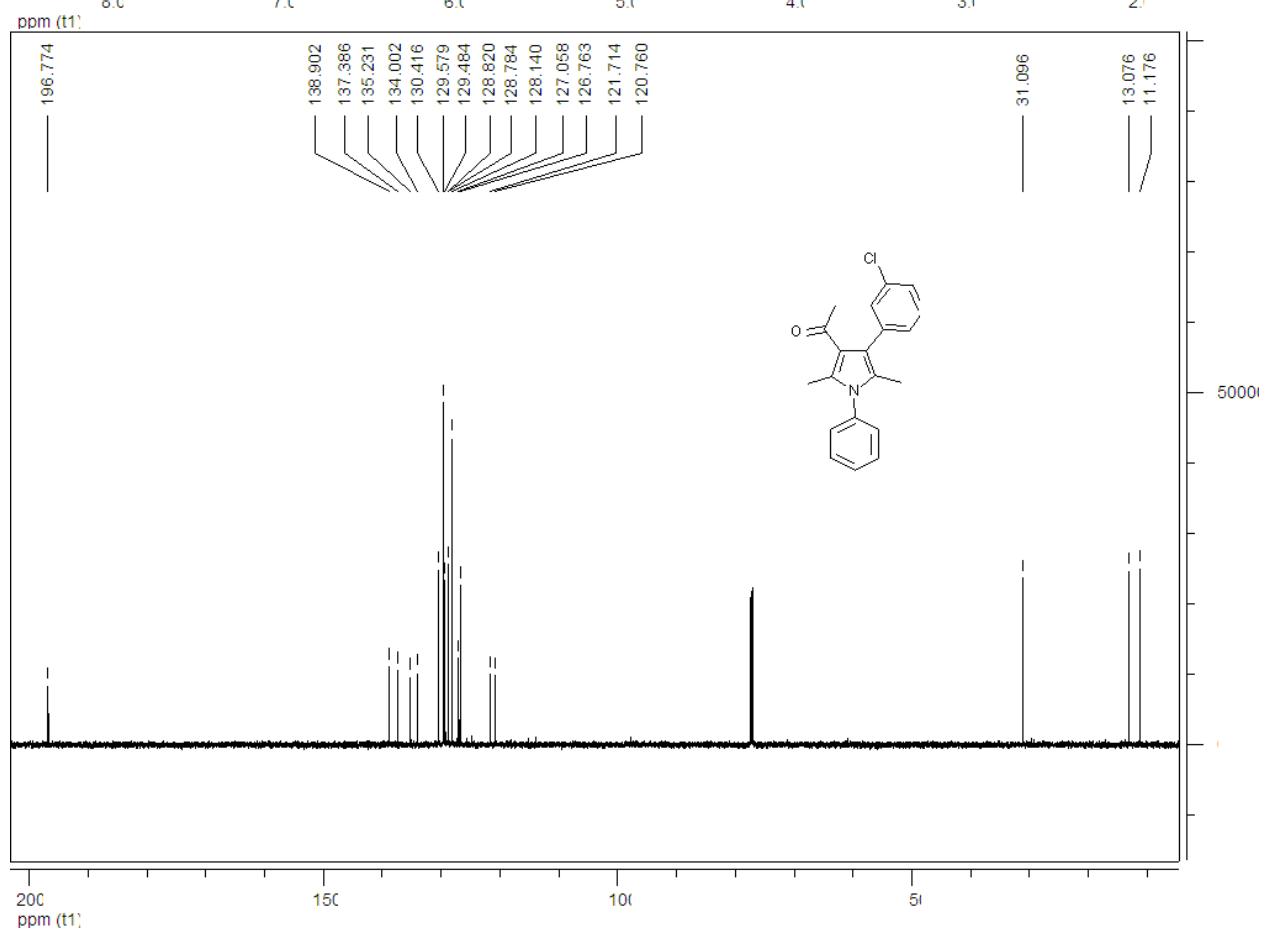

$^1\text{H}$  NMR and  $^{13}\text{C}$  NMR of compound **4g**

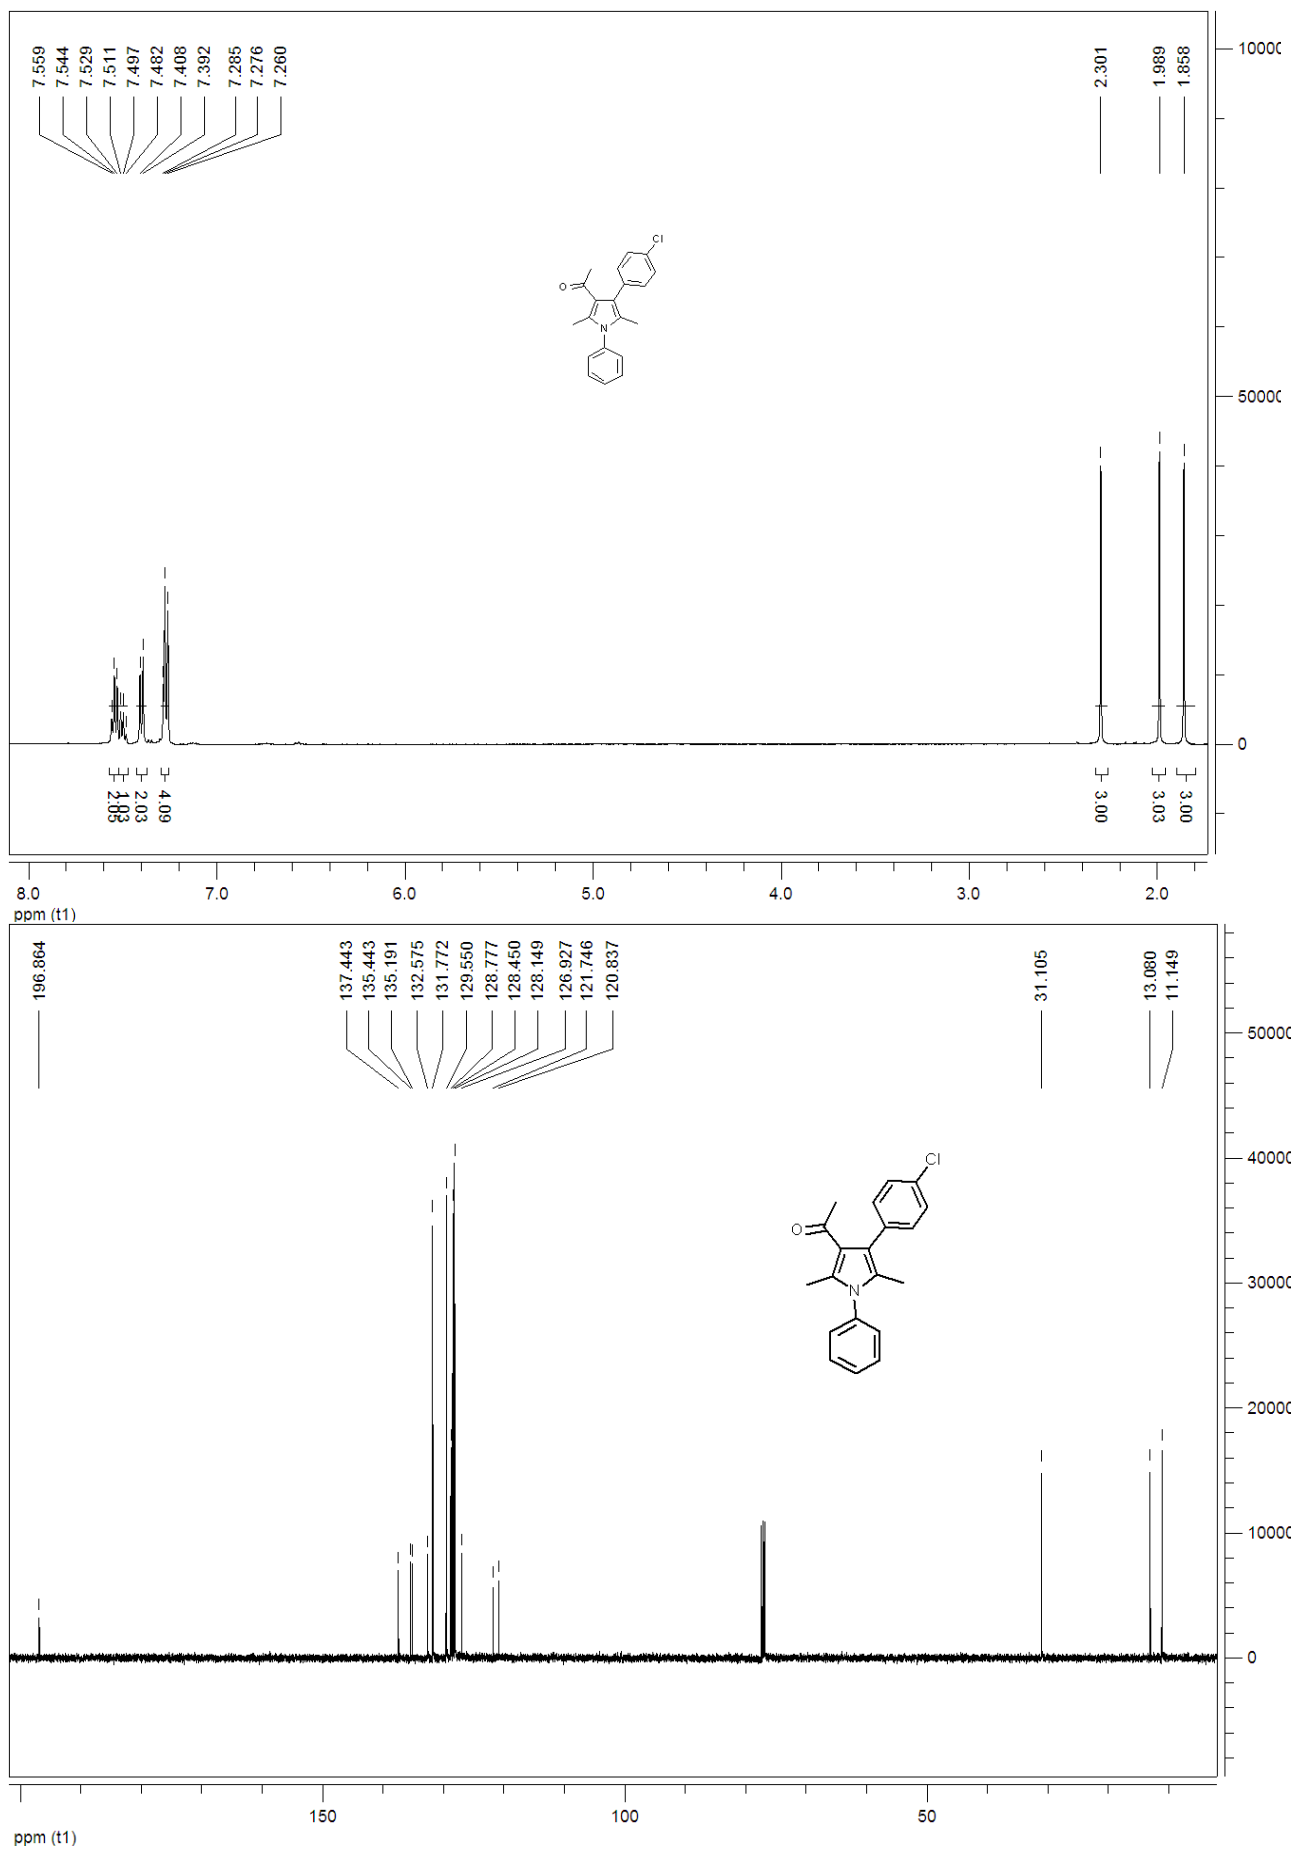

$^1\text{H}$  NMR and  $^{13}\text{C}$  NMR of compound **4h**

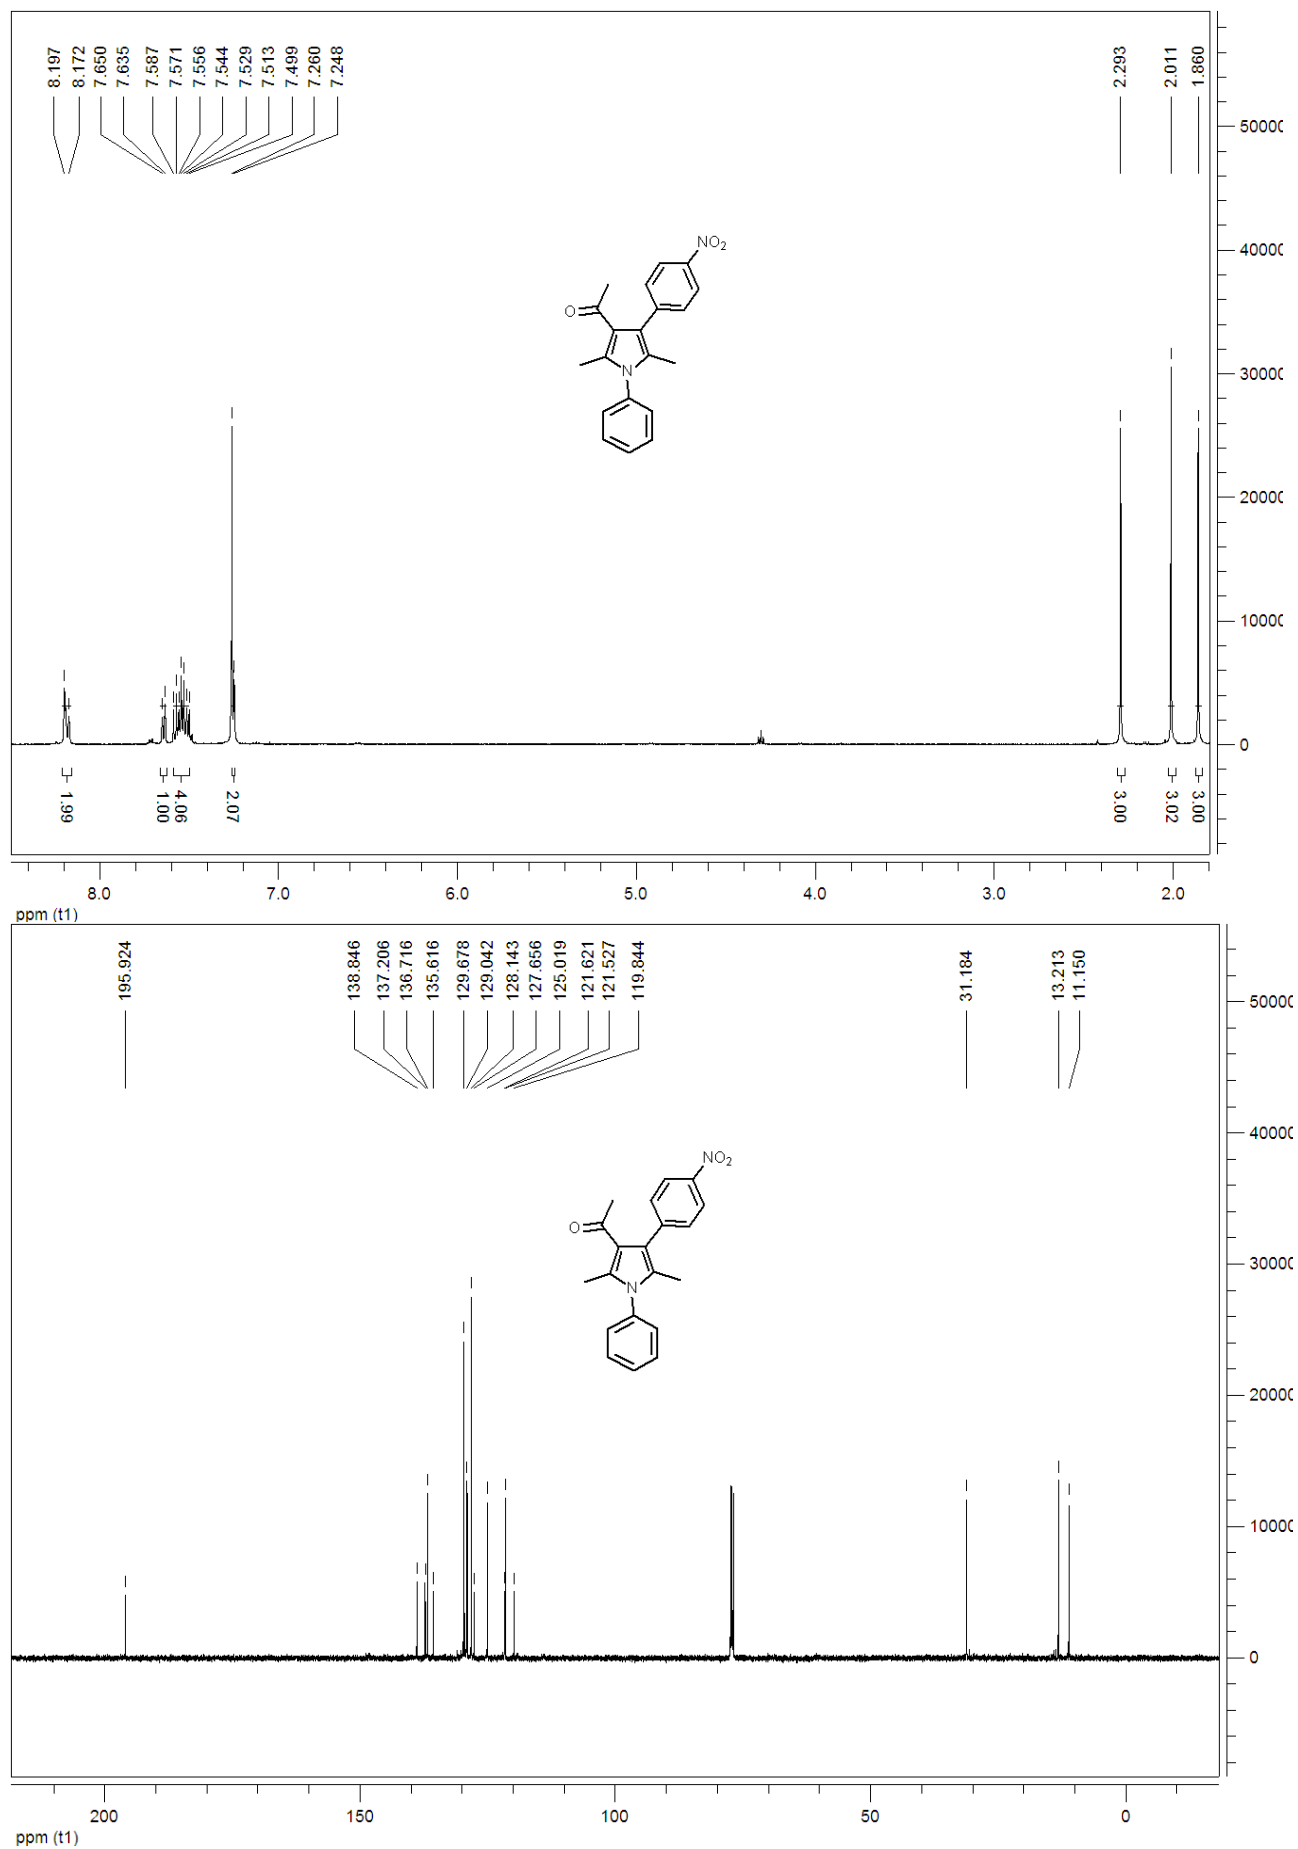

$^1\text{H}$  NMR and  $^{13}\text{C}$  NMR of compound **4i**

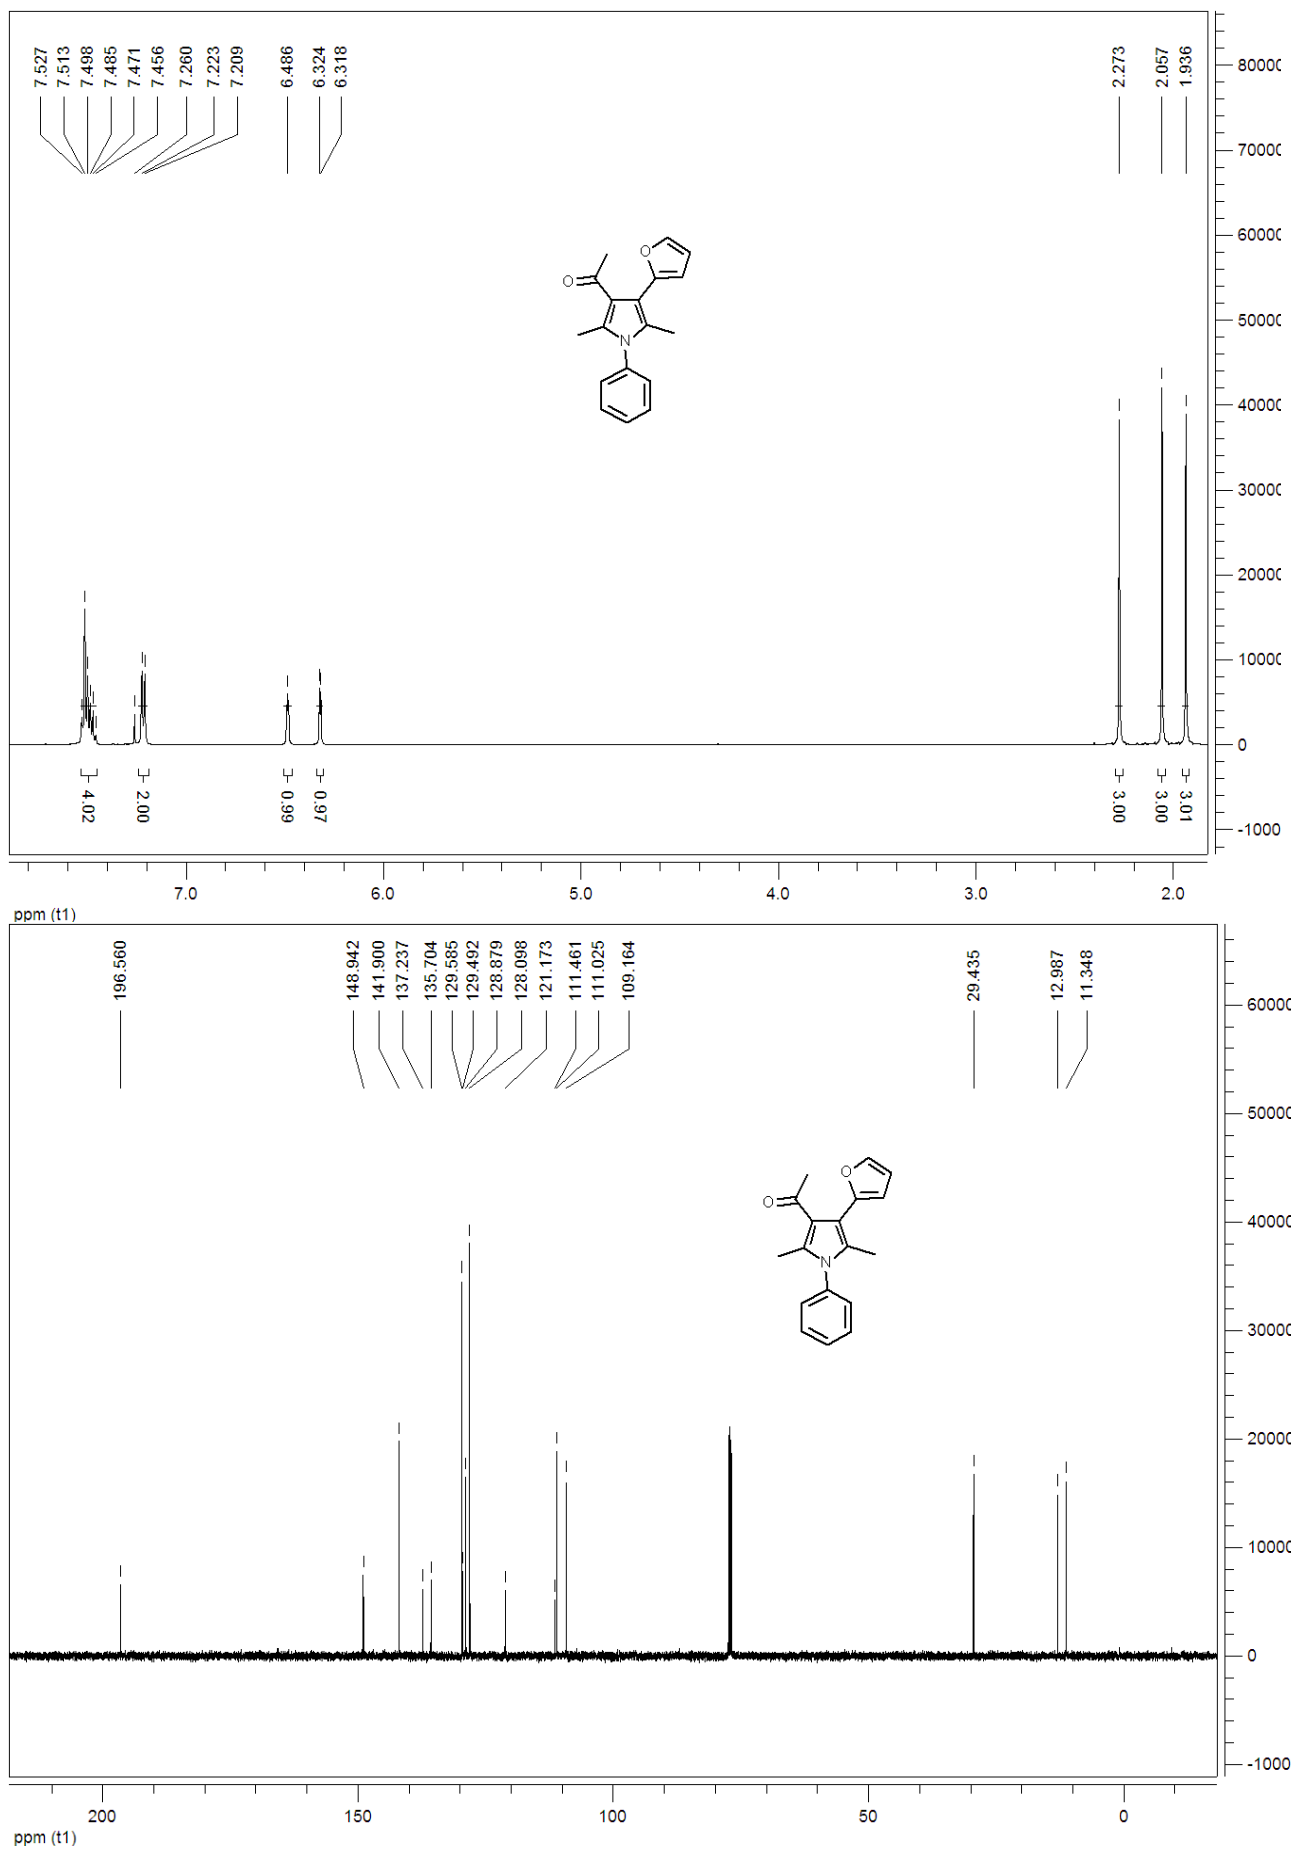

$^1\text{H}$  NMR and  $^{13}\text{C}$  NMR of compound **4j**

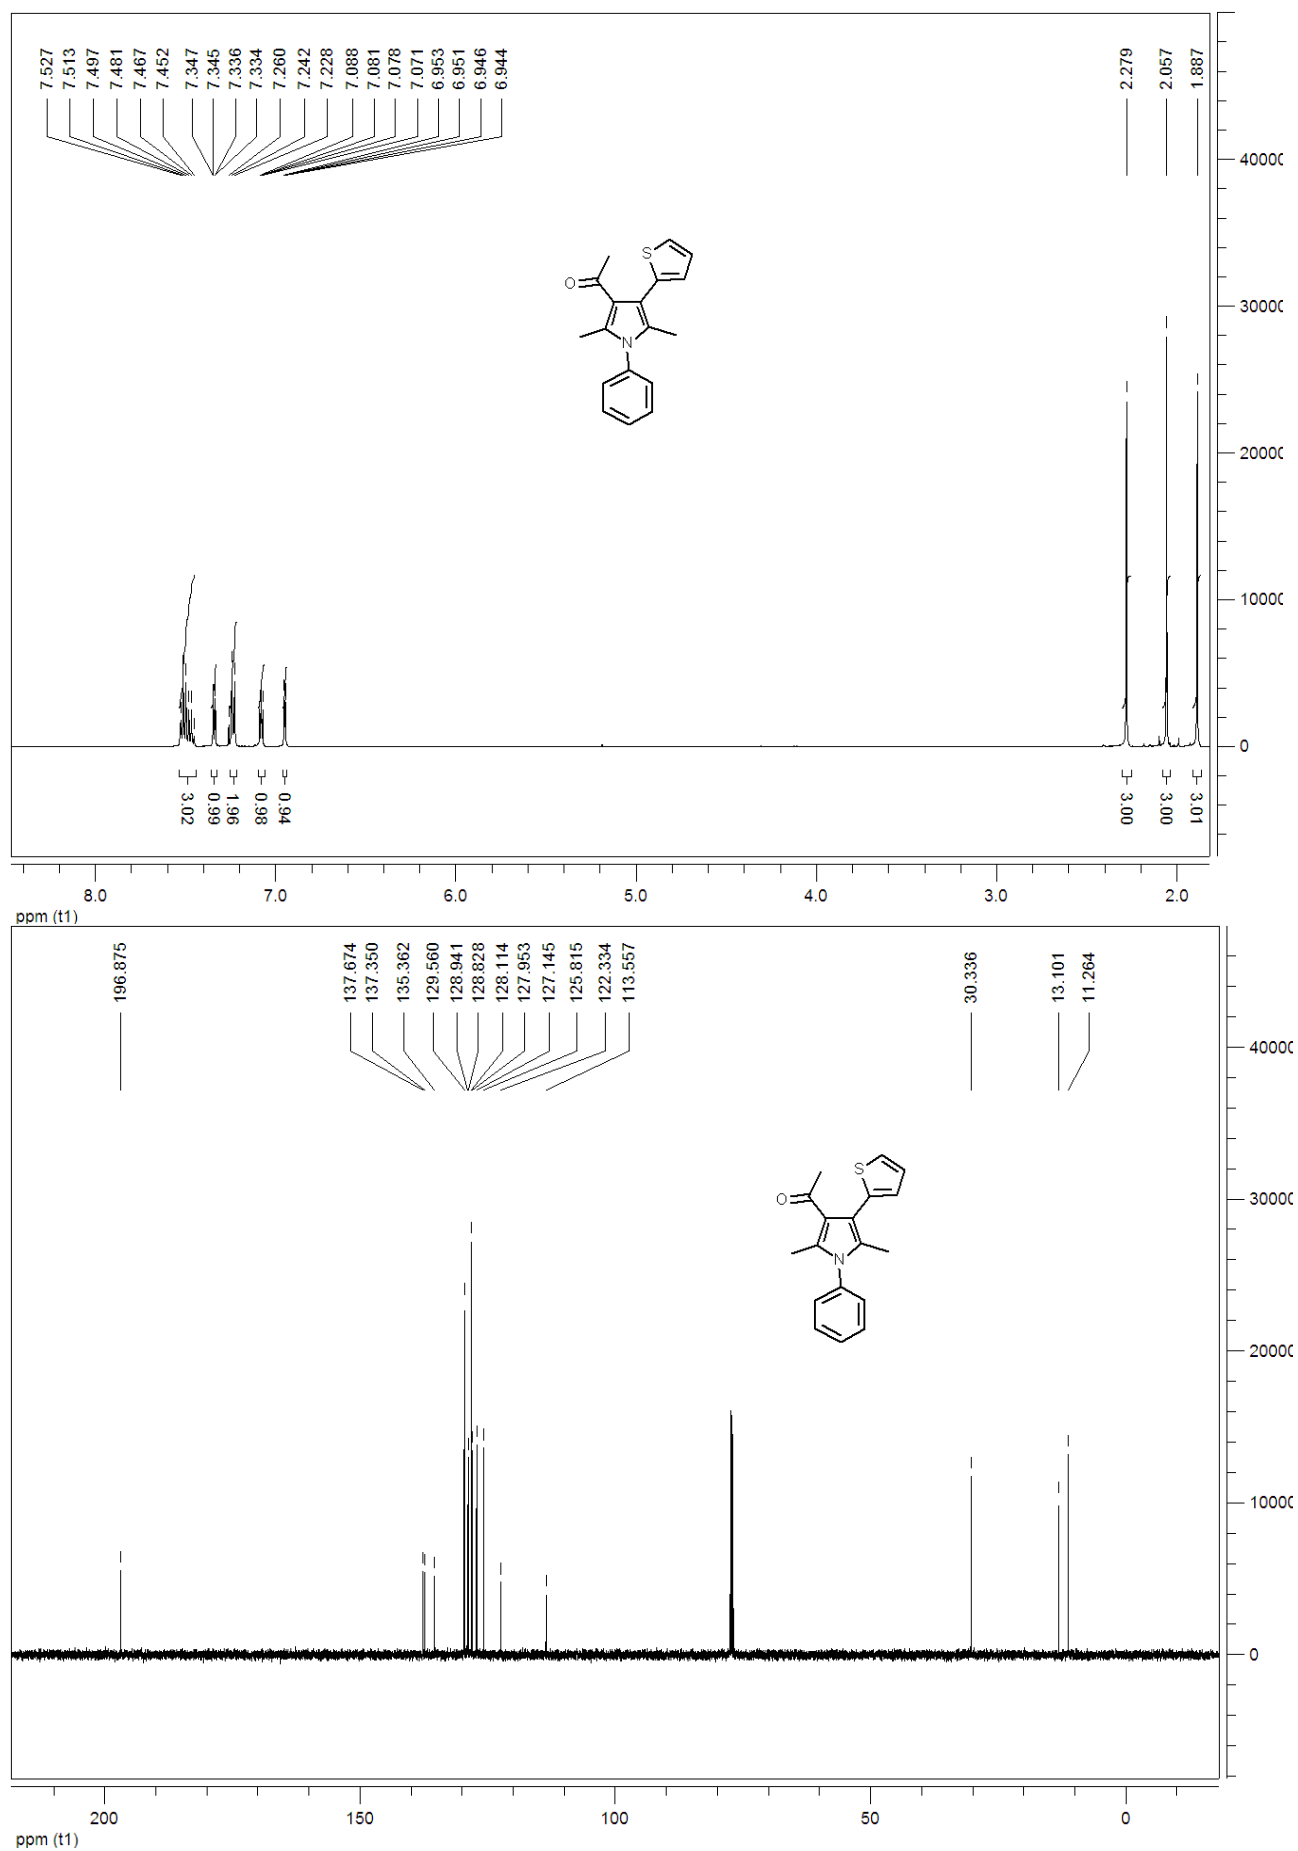

$^1\text{H}$  NMR and  $^{13}\text{C}$  NMR of compound **4k**

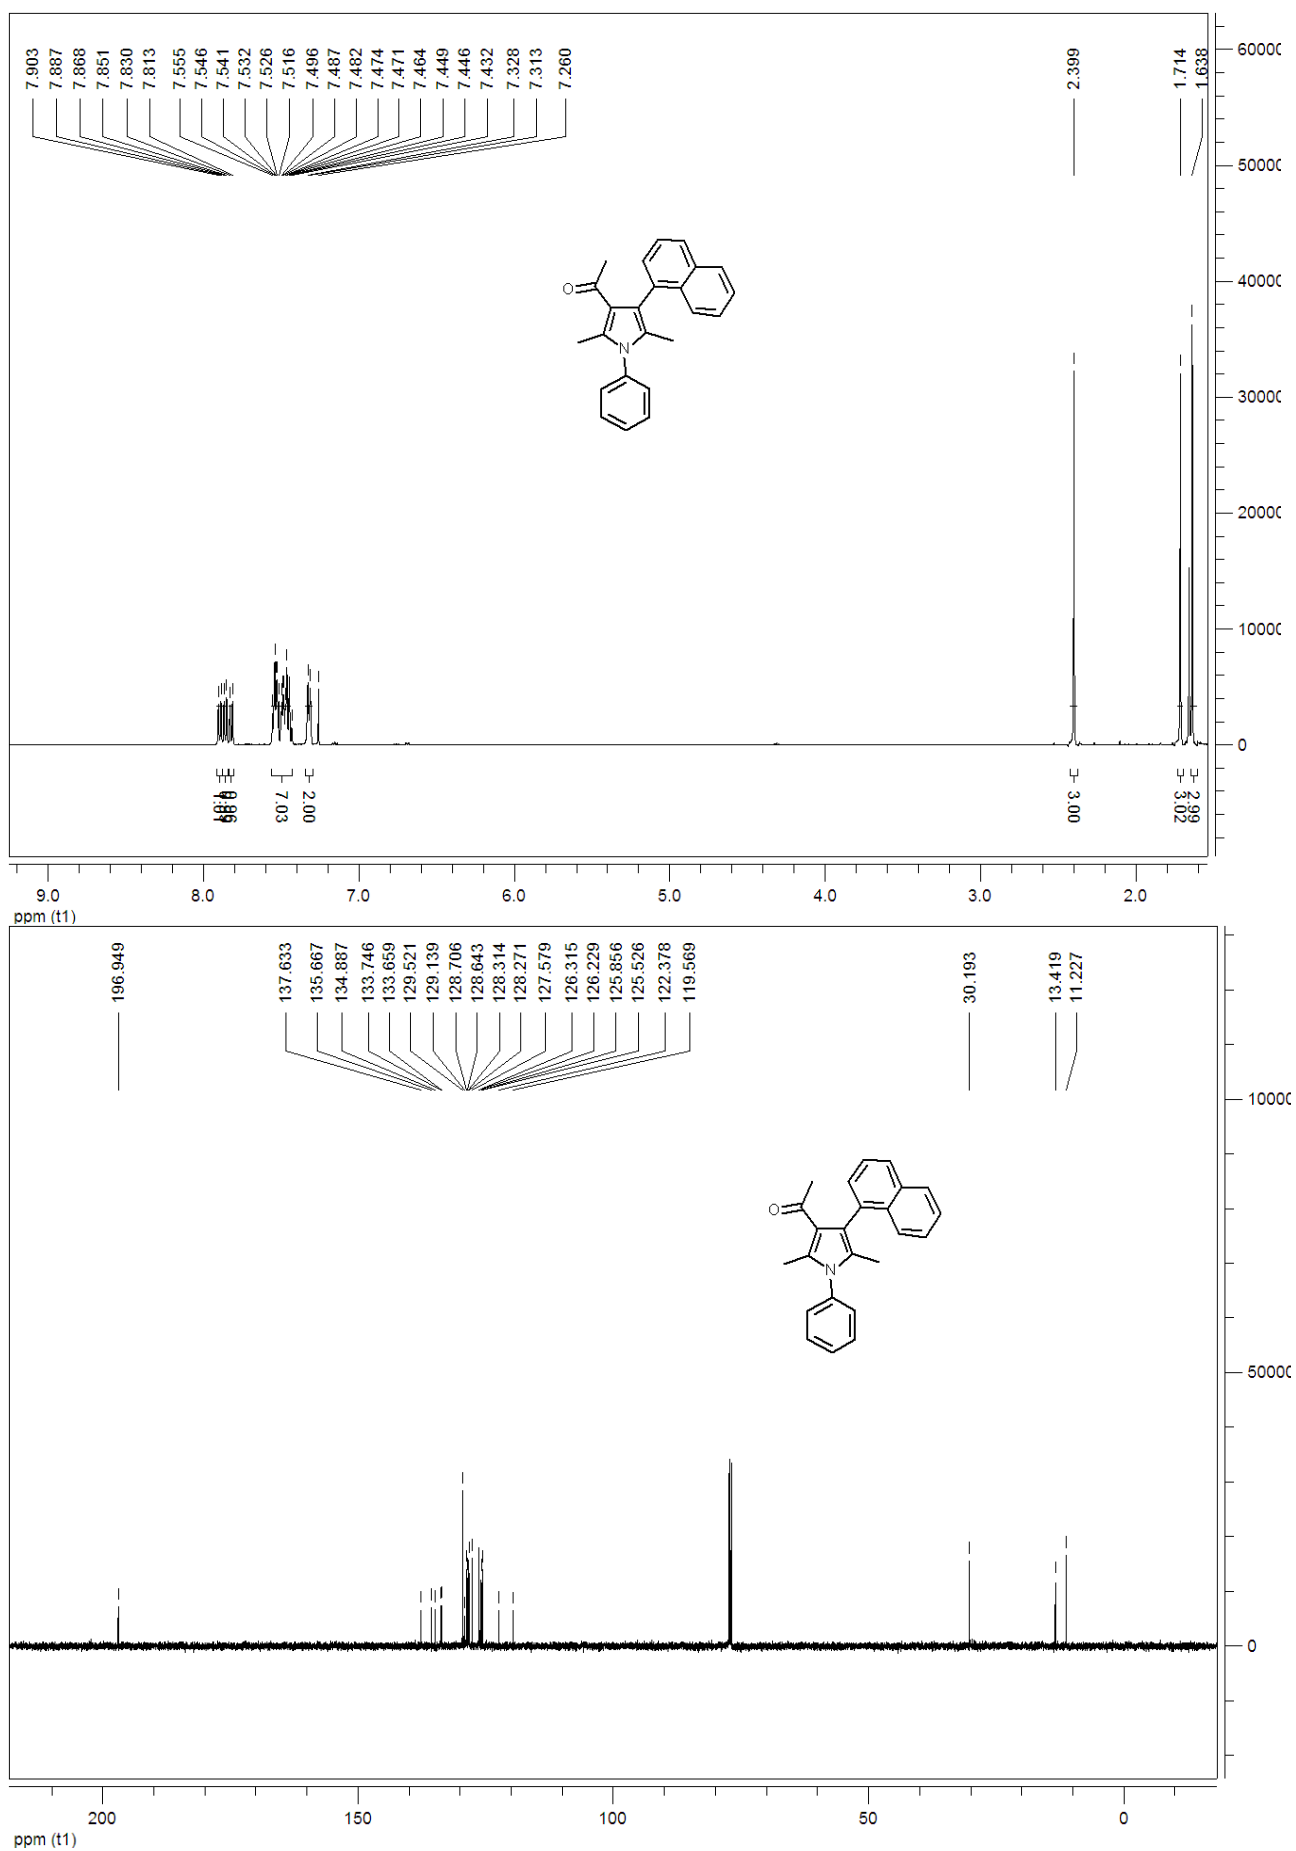

$^1\text{H}$  NMR and  $^{13}\text{C}$  NMR of compound **4l**

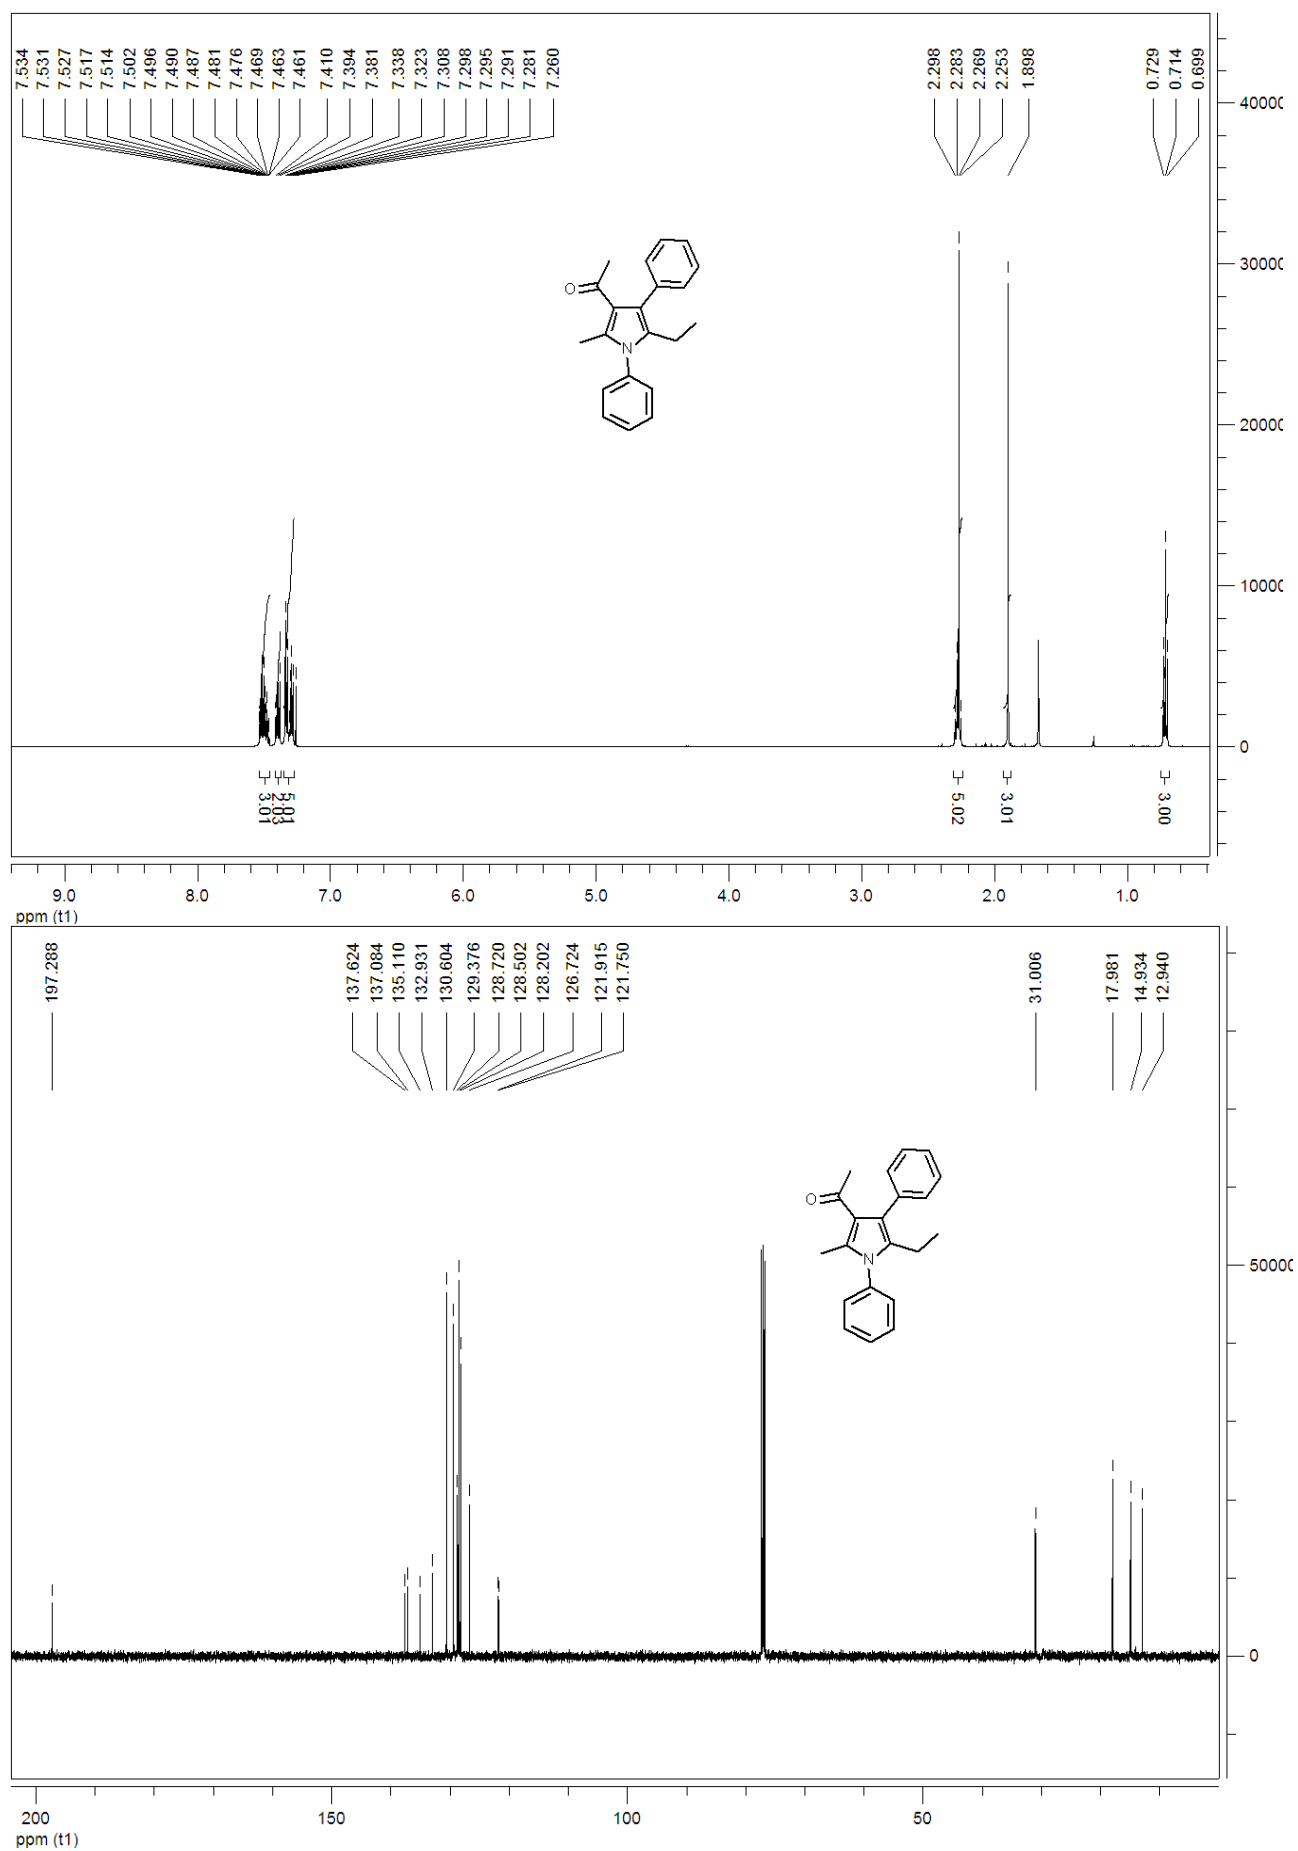

$^1\text{H}$  NMR and  $^{13}\text{C}$  NMR of compound **4m**

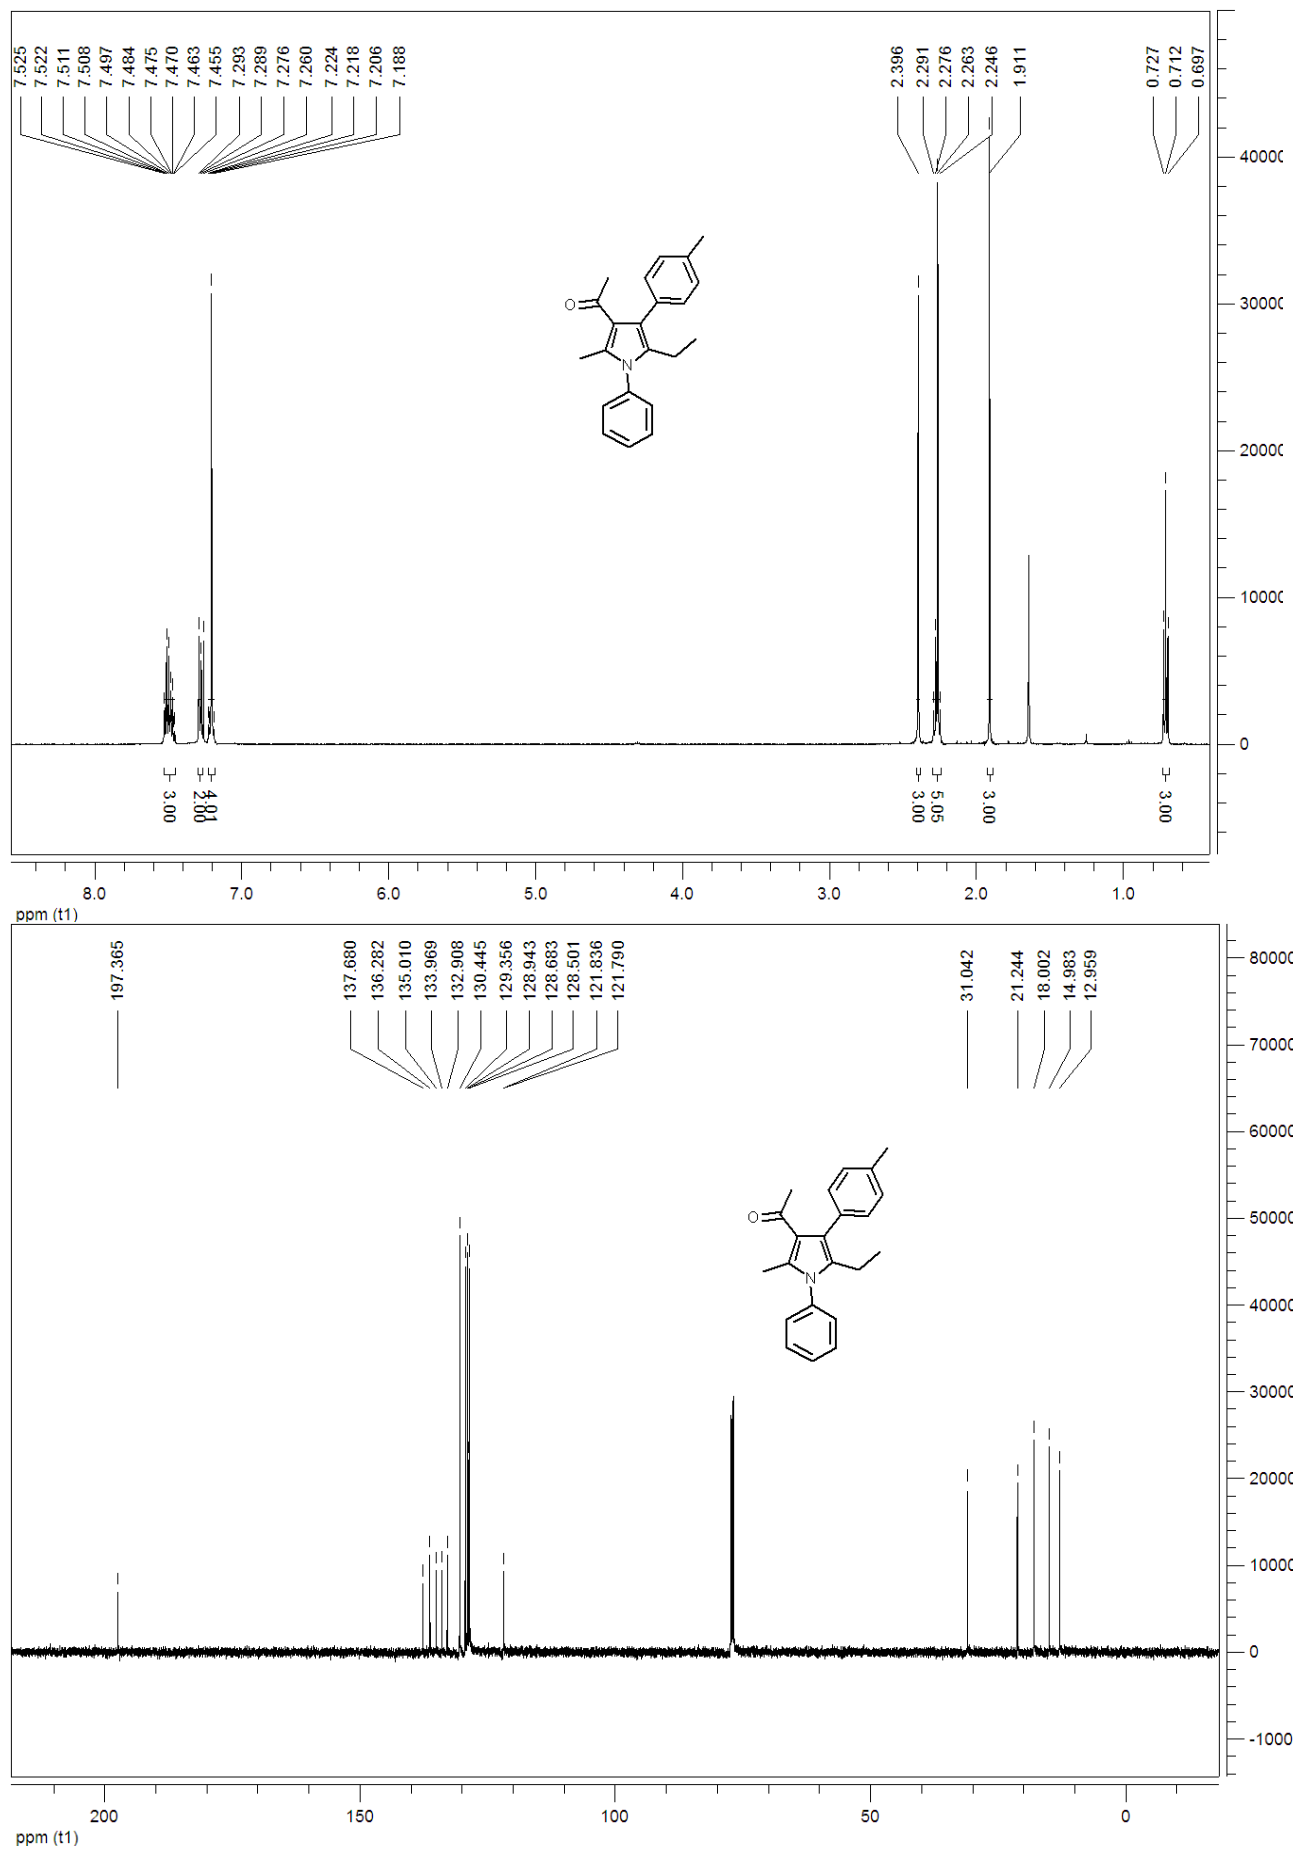

$^1\text{H}$  NMR and  $^{13}\text{C}$  NMR of compound **4n**

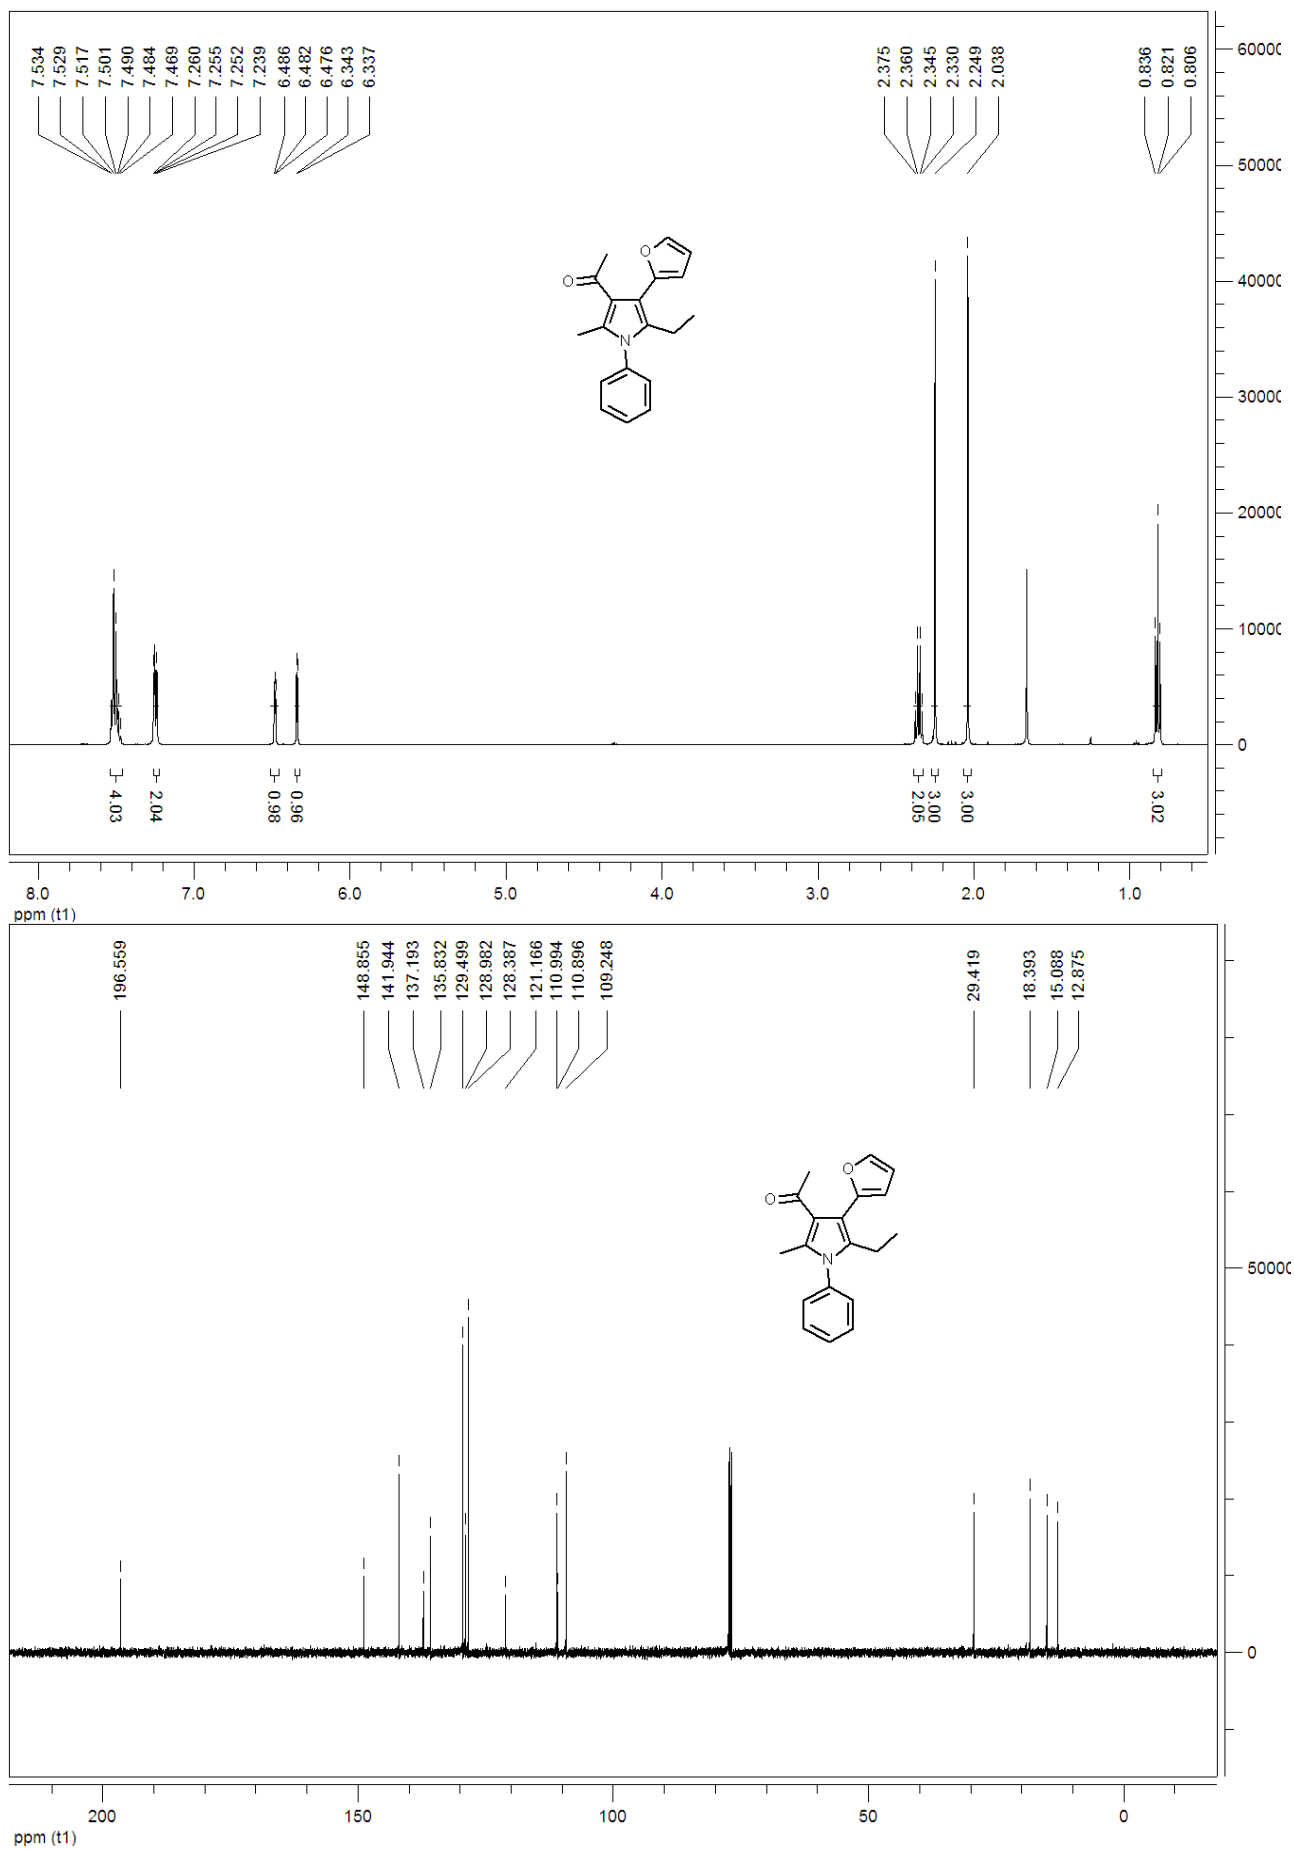

$^1\text{H}$  NMR and  $^{13}\text{C}$  NMR of compound **4o**

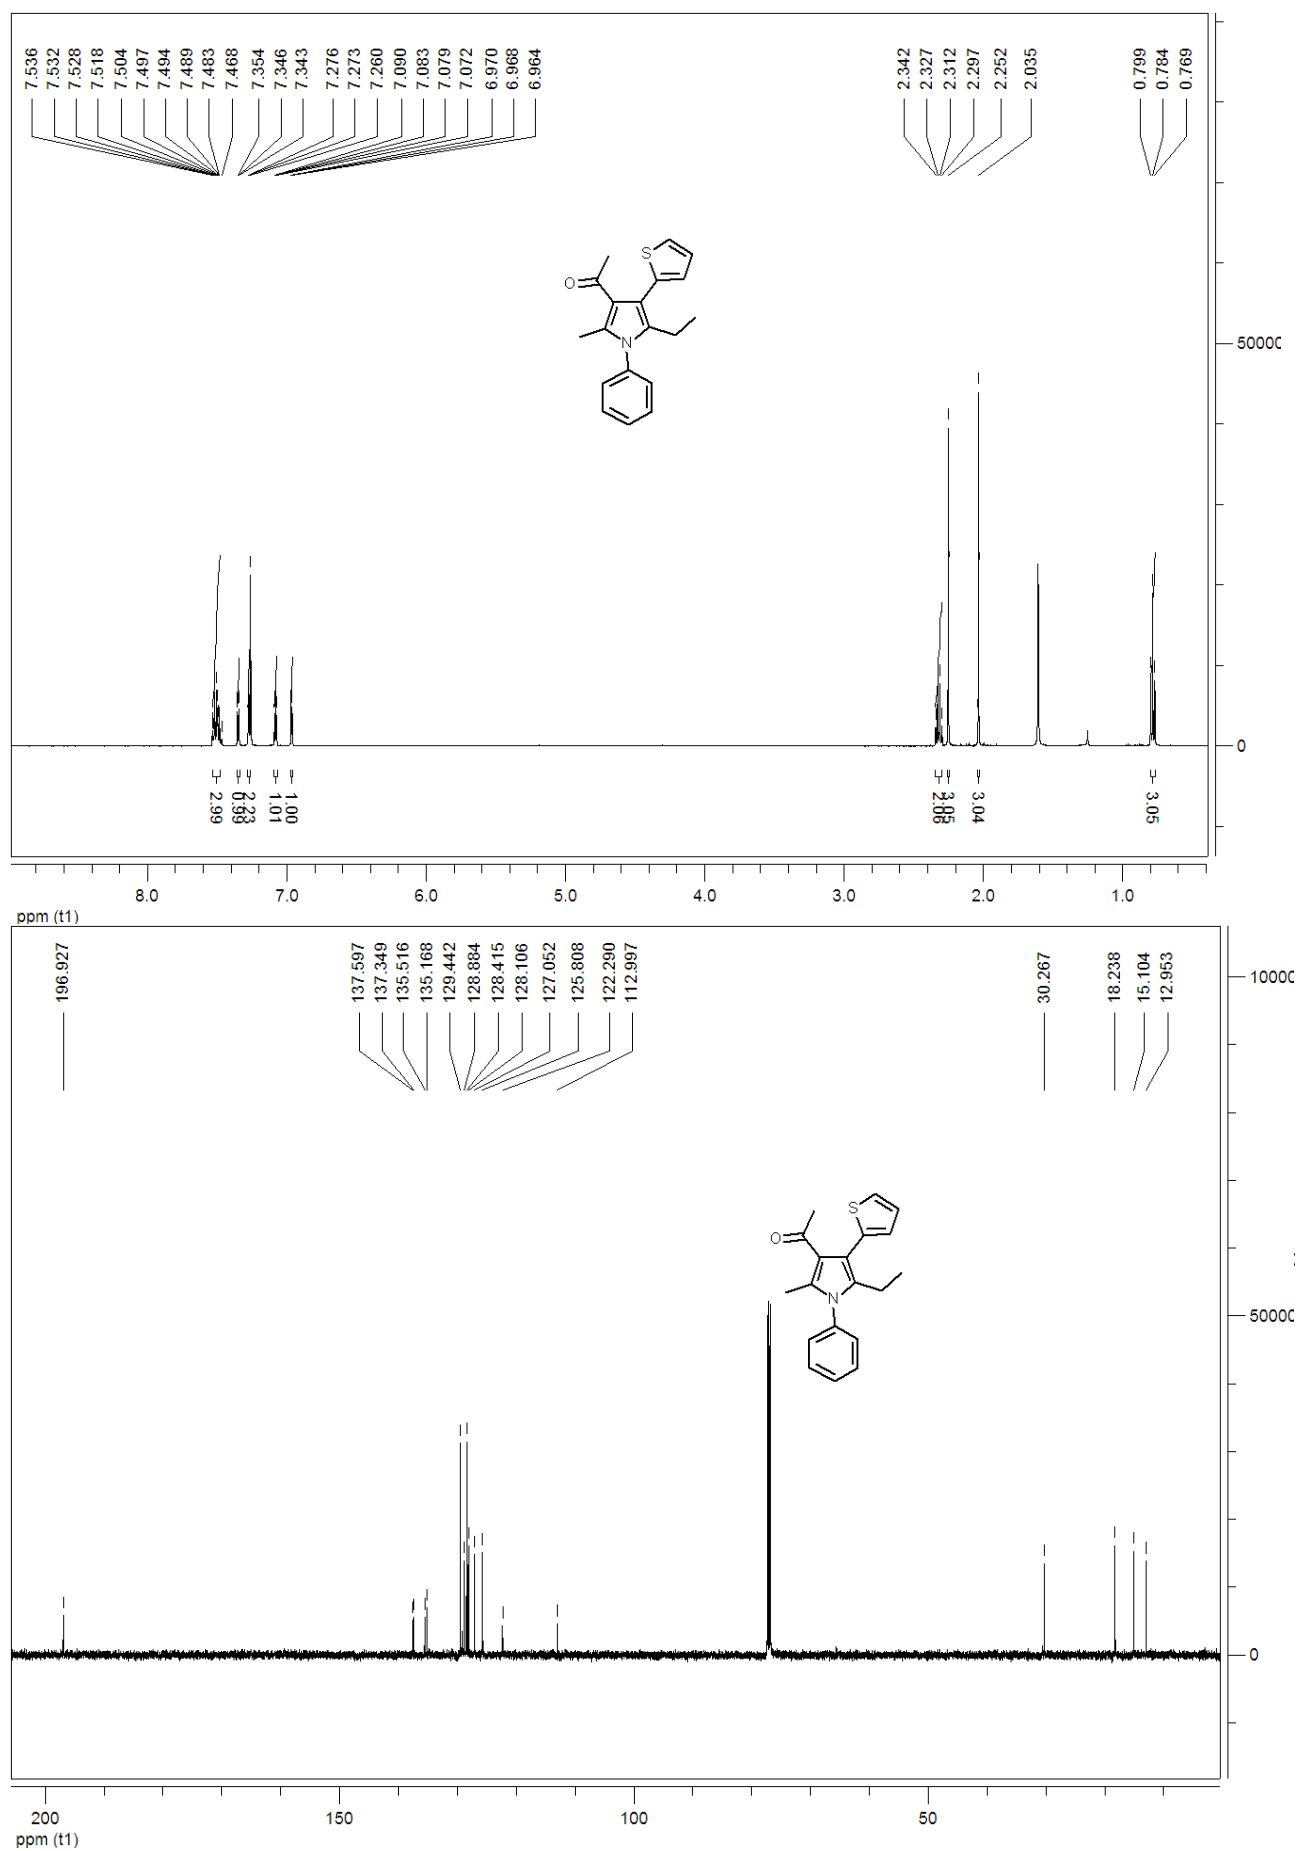

$^1\text{H}$  NMR and  $^{13}\text{C}$  NMR of compound **4p**

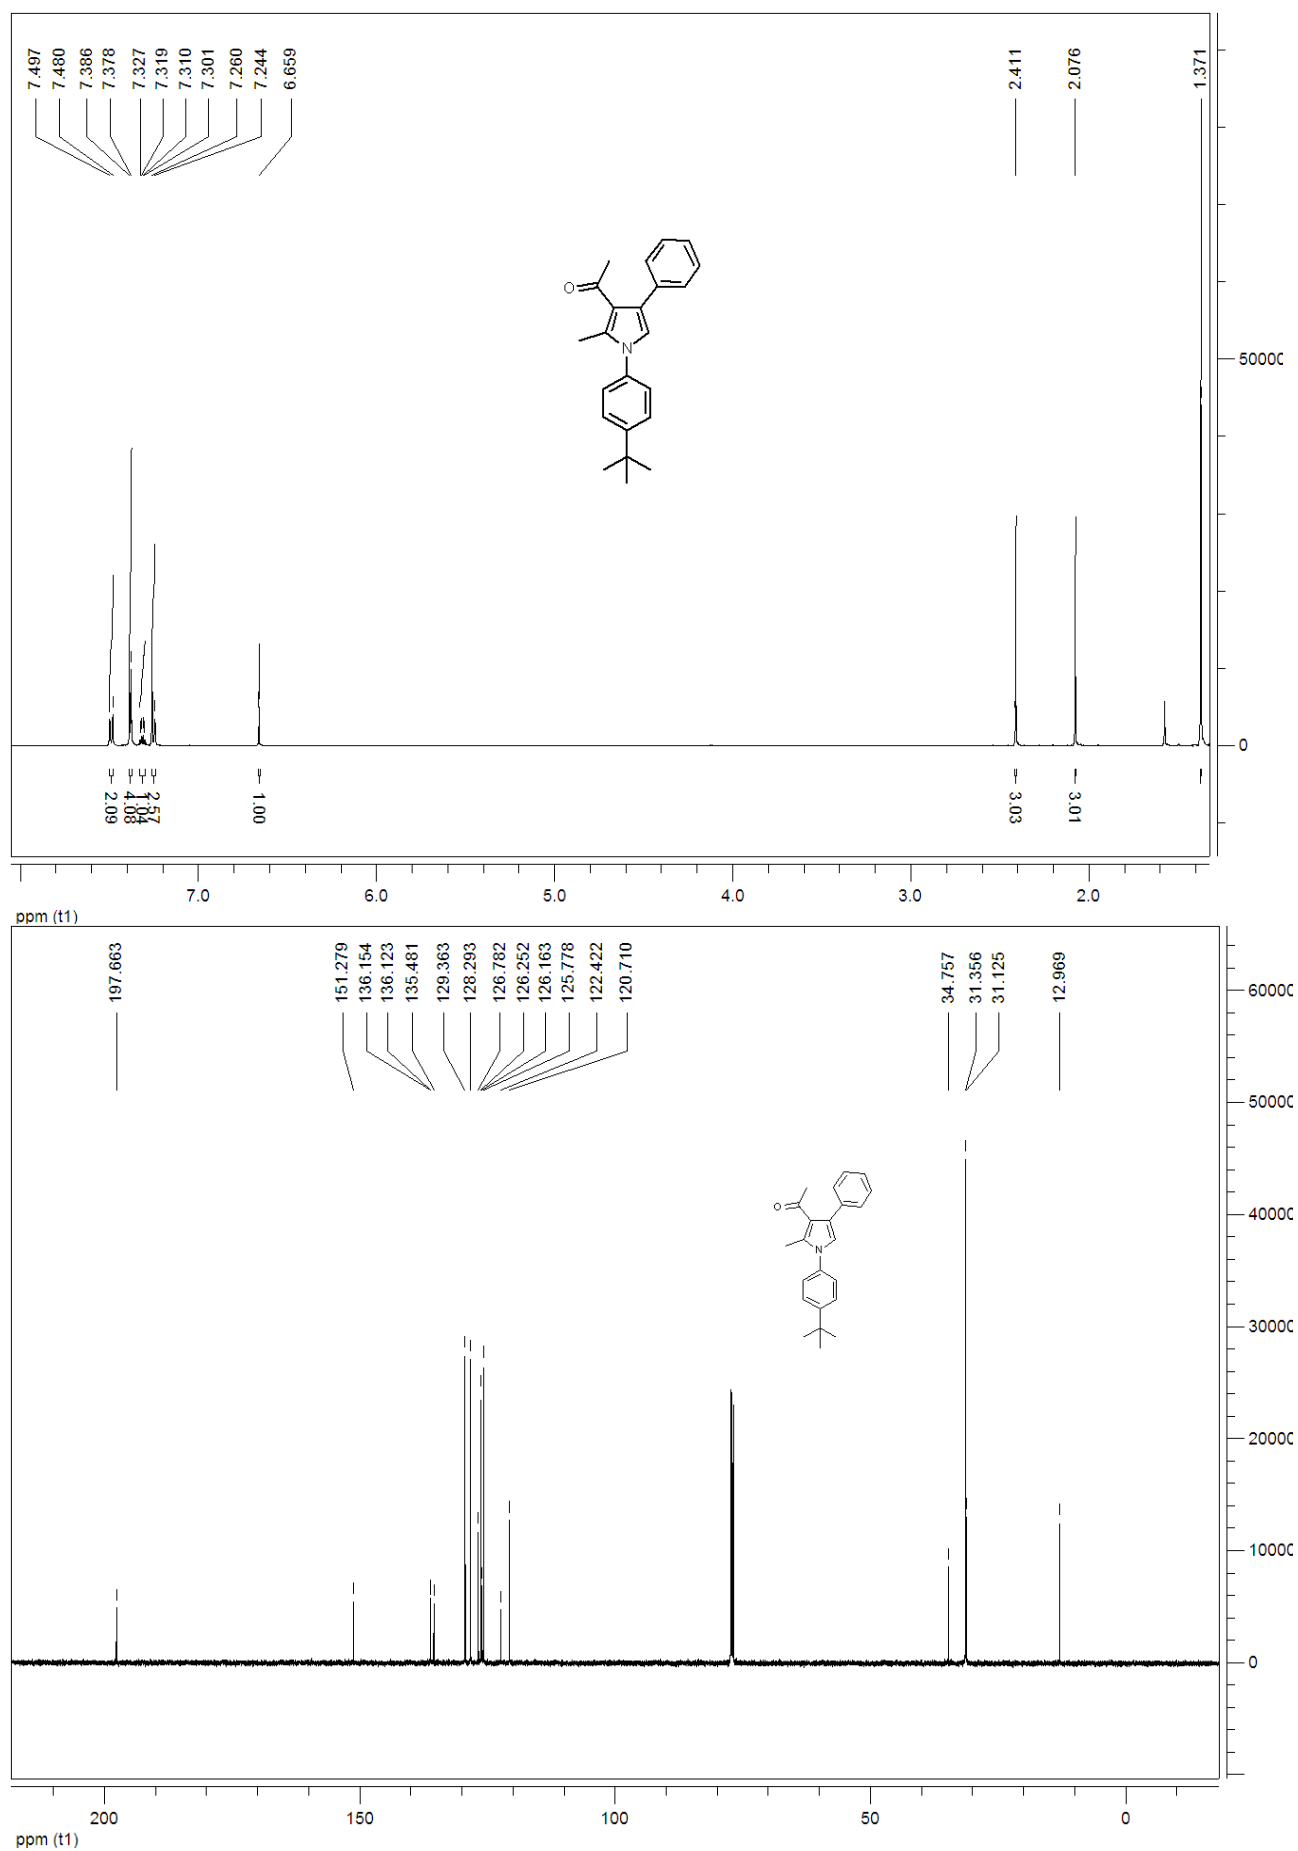

$^1\text{H}$  NMR and  $^{13}\text{C}$  NMR of compound **4q**

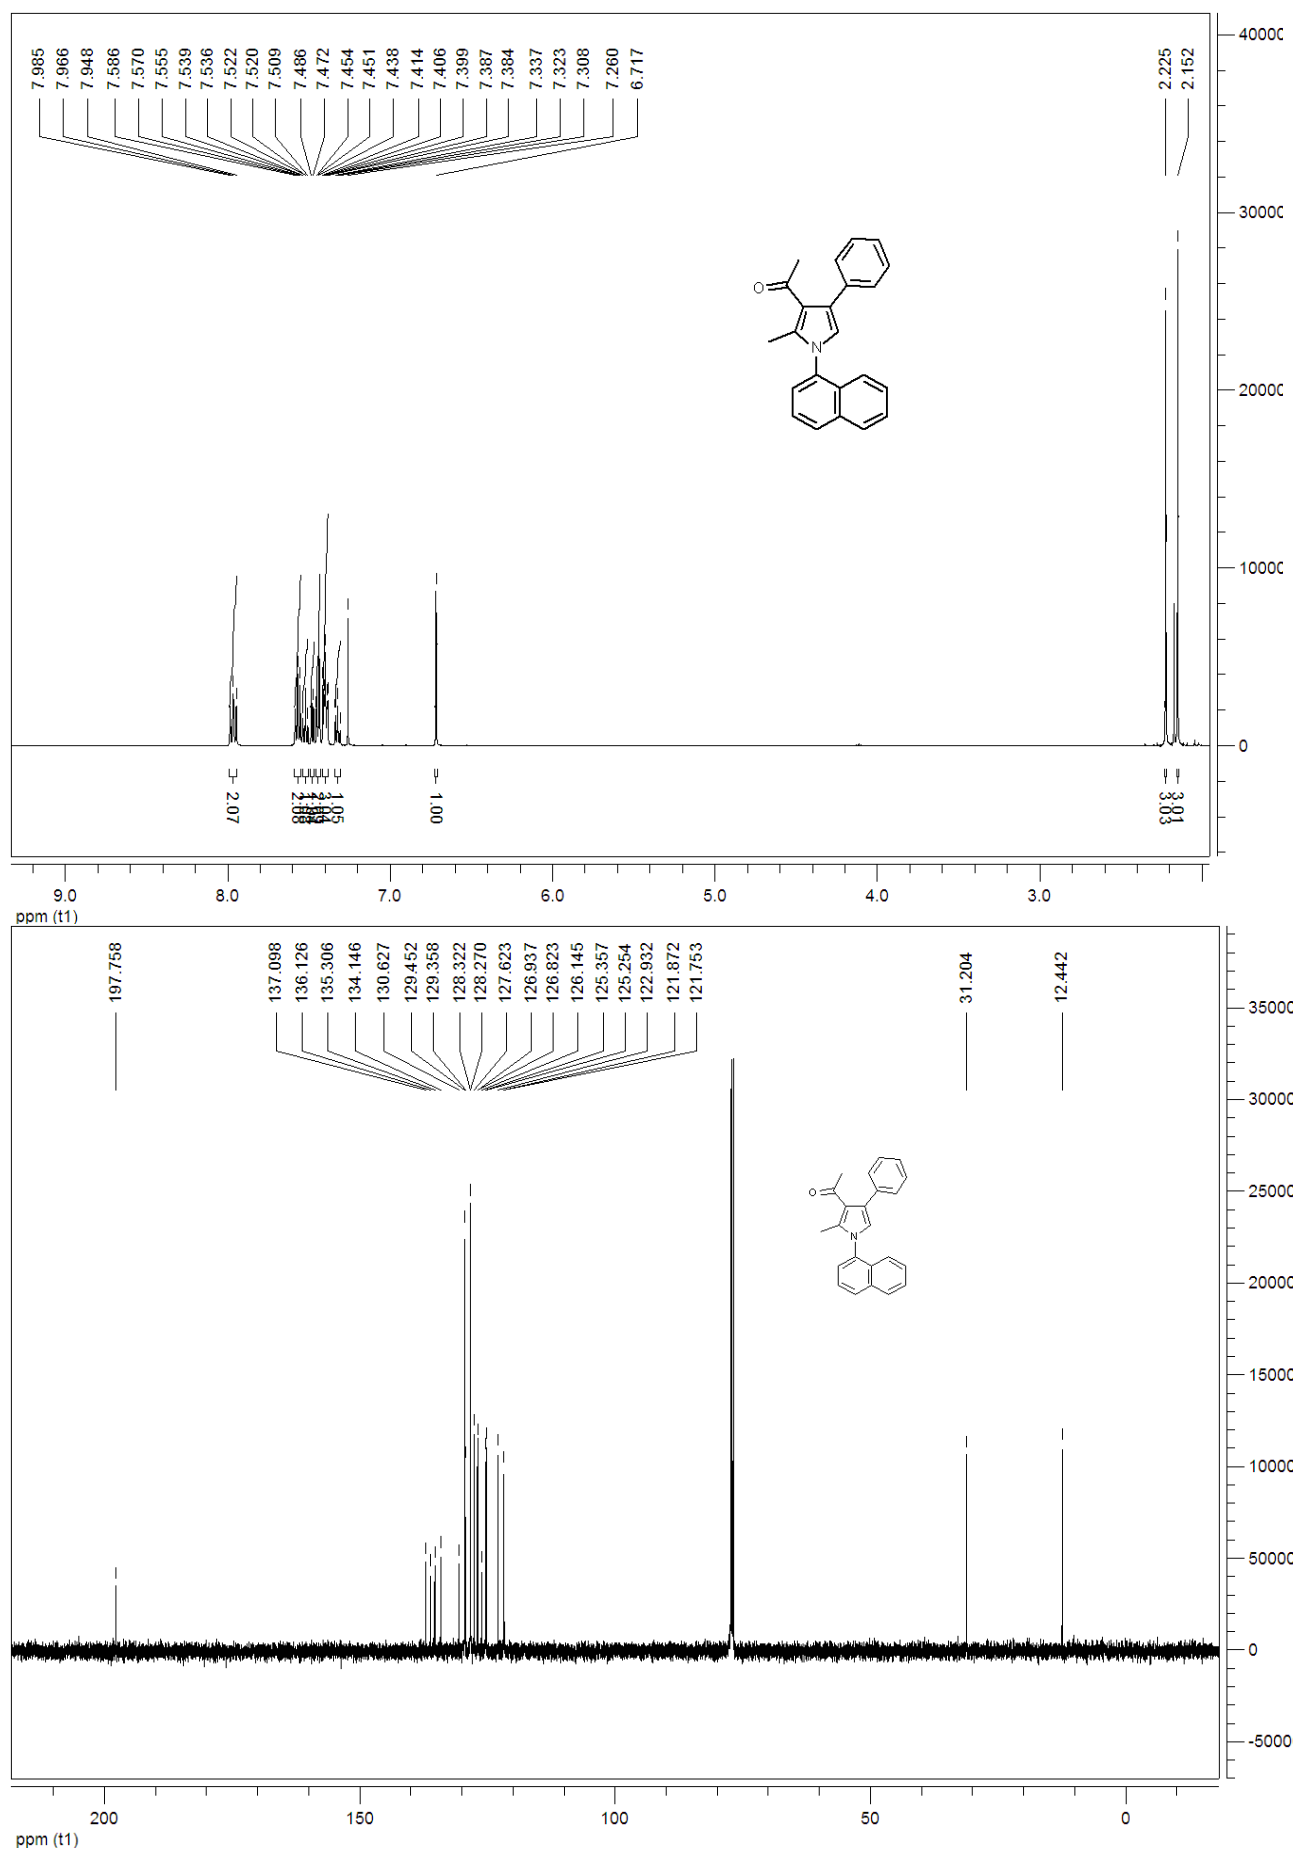

$^1\text{H}$  NMR and  $^{13}\text{C}$  NMR of compound **4r**

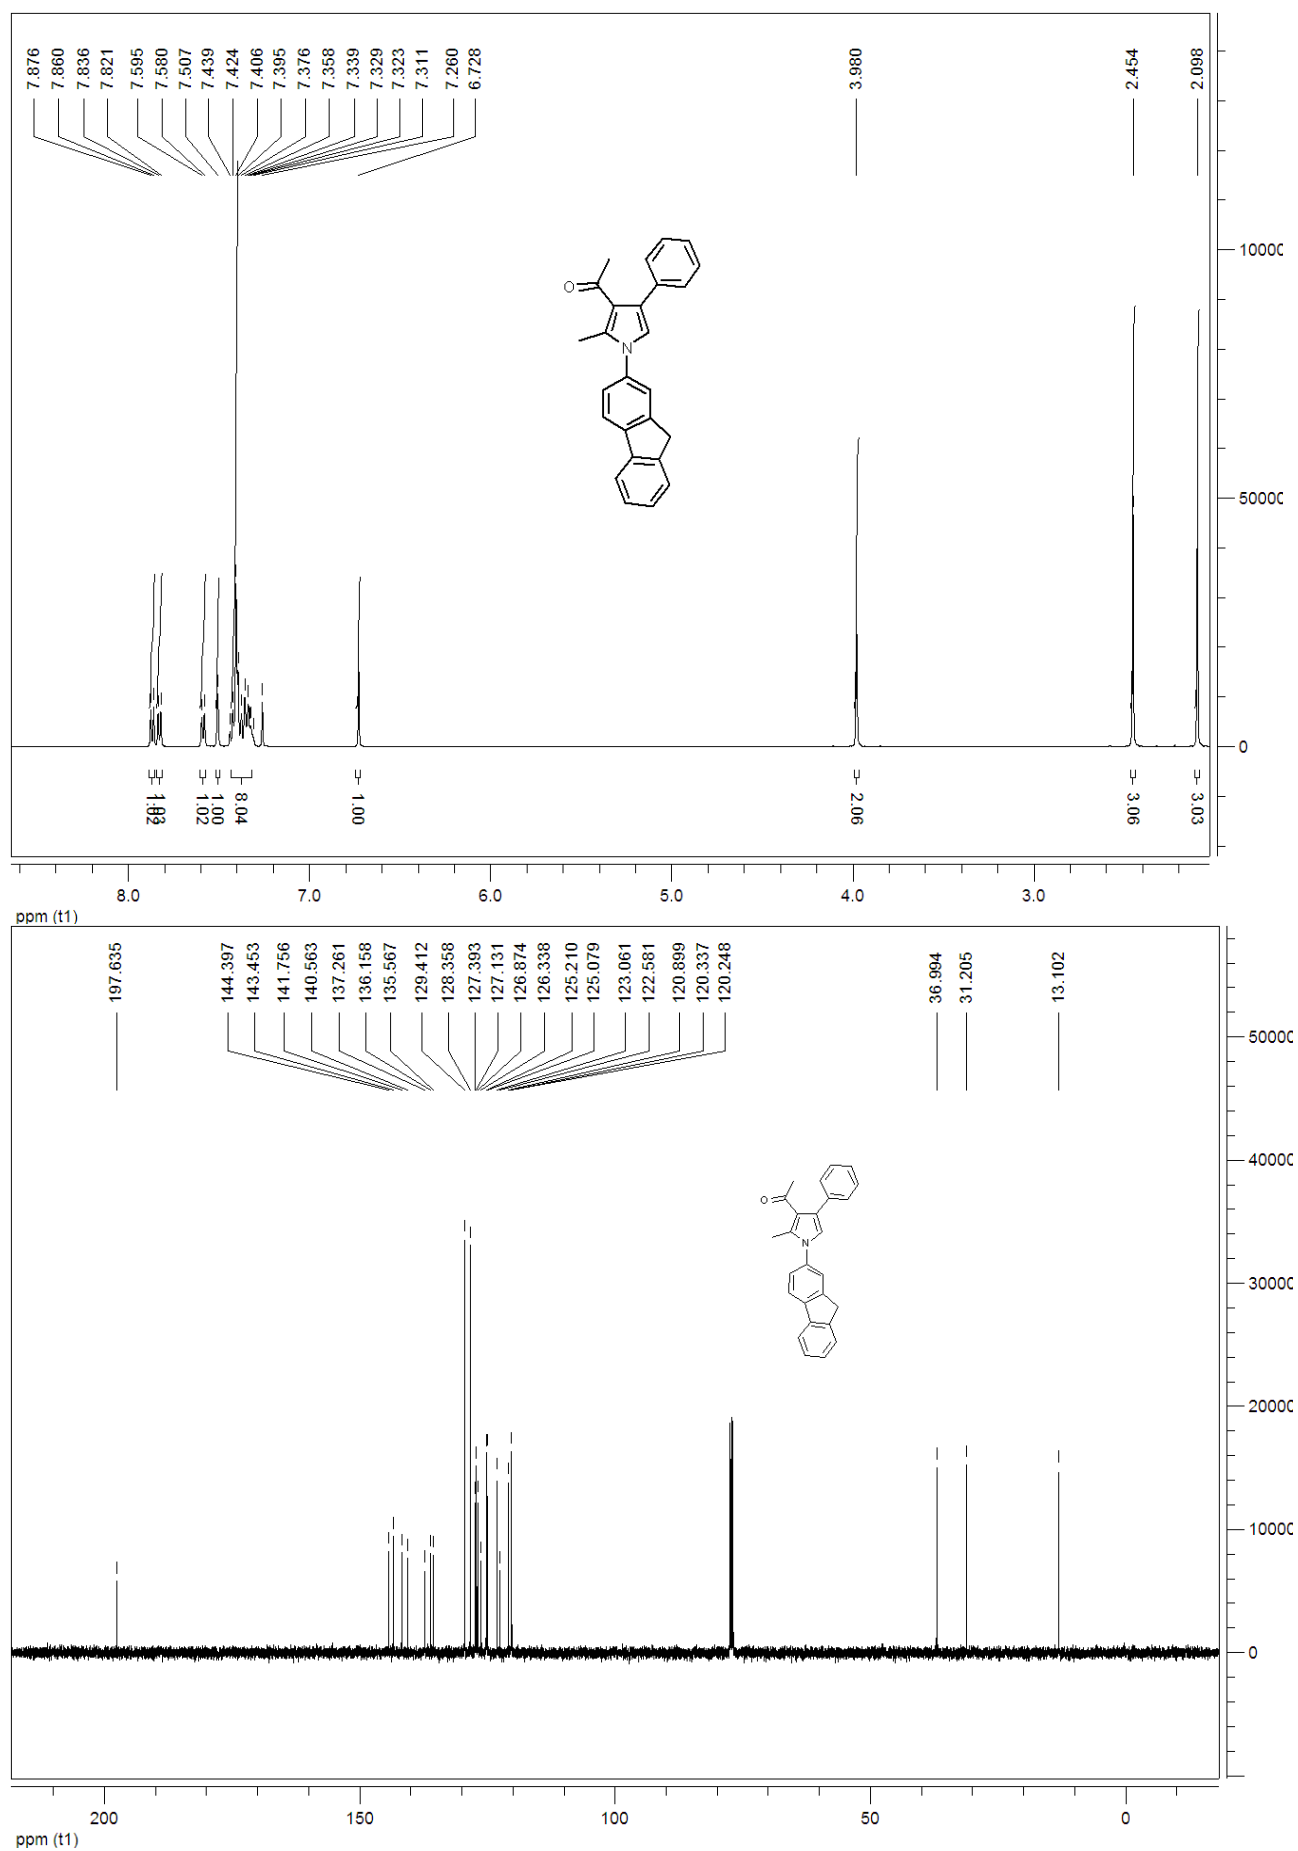

$^1\text{H}$  NMR and  $^{13}\text{C}$  NMR of compound **4s**

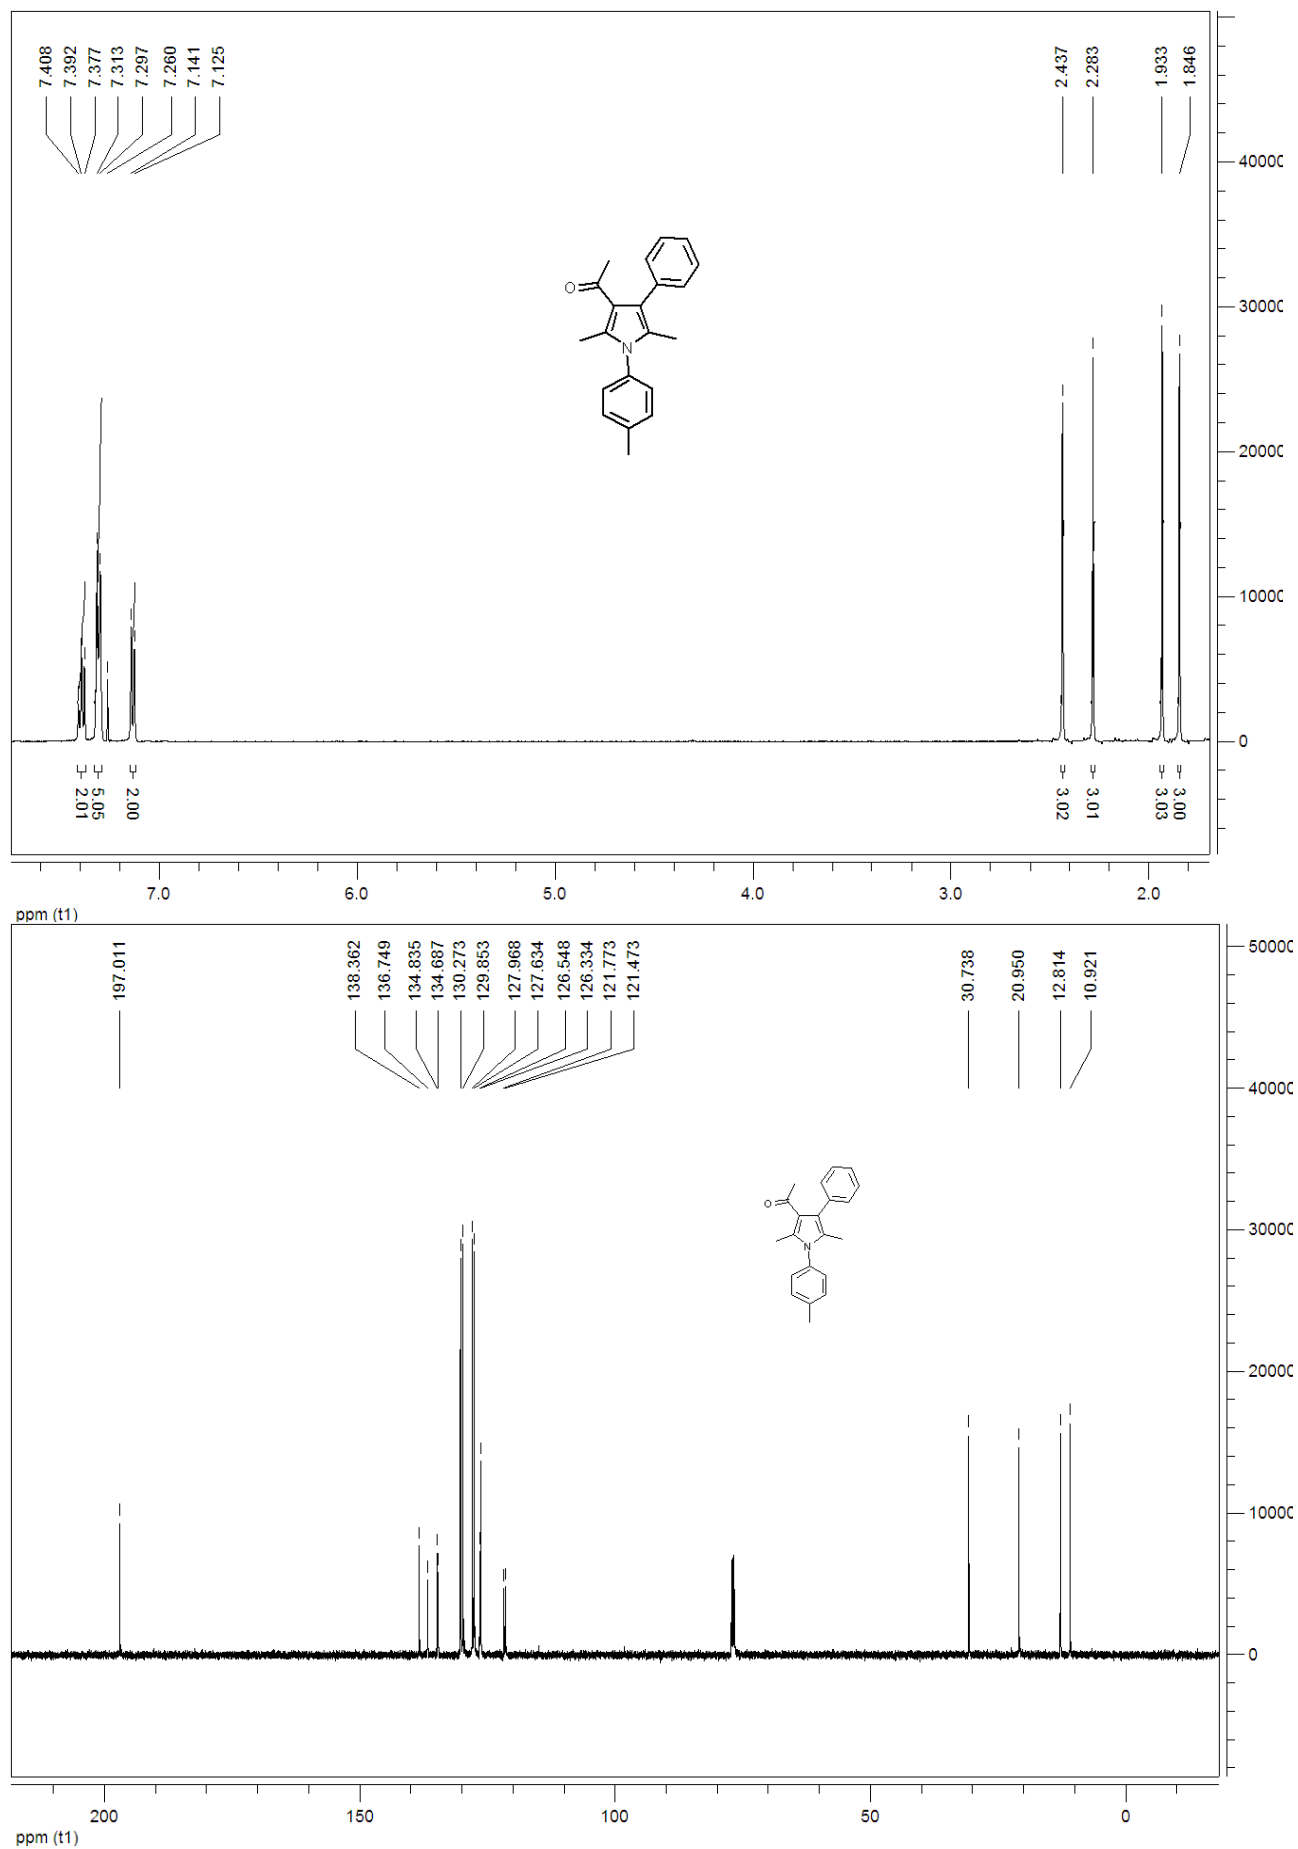

<sup>1</sup>H NMR and <sup>13</sup>C NMR of compound **4t**

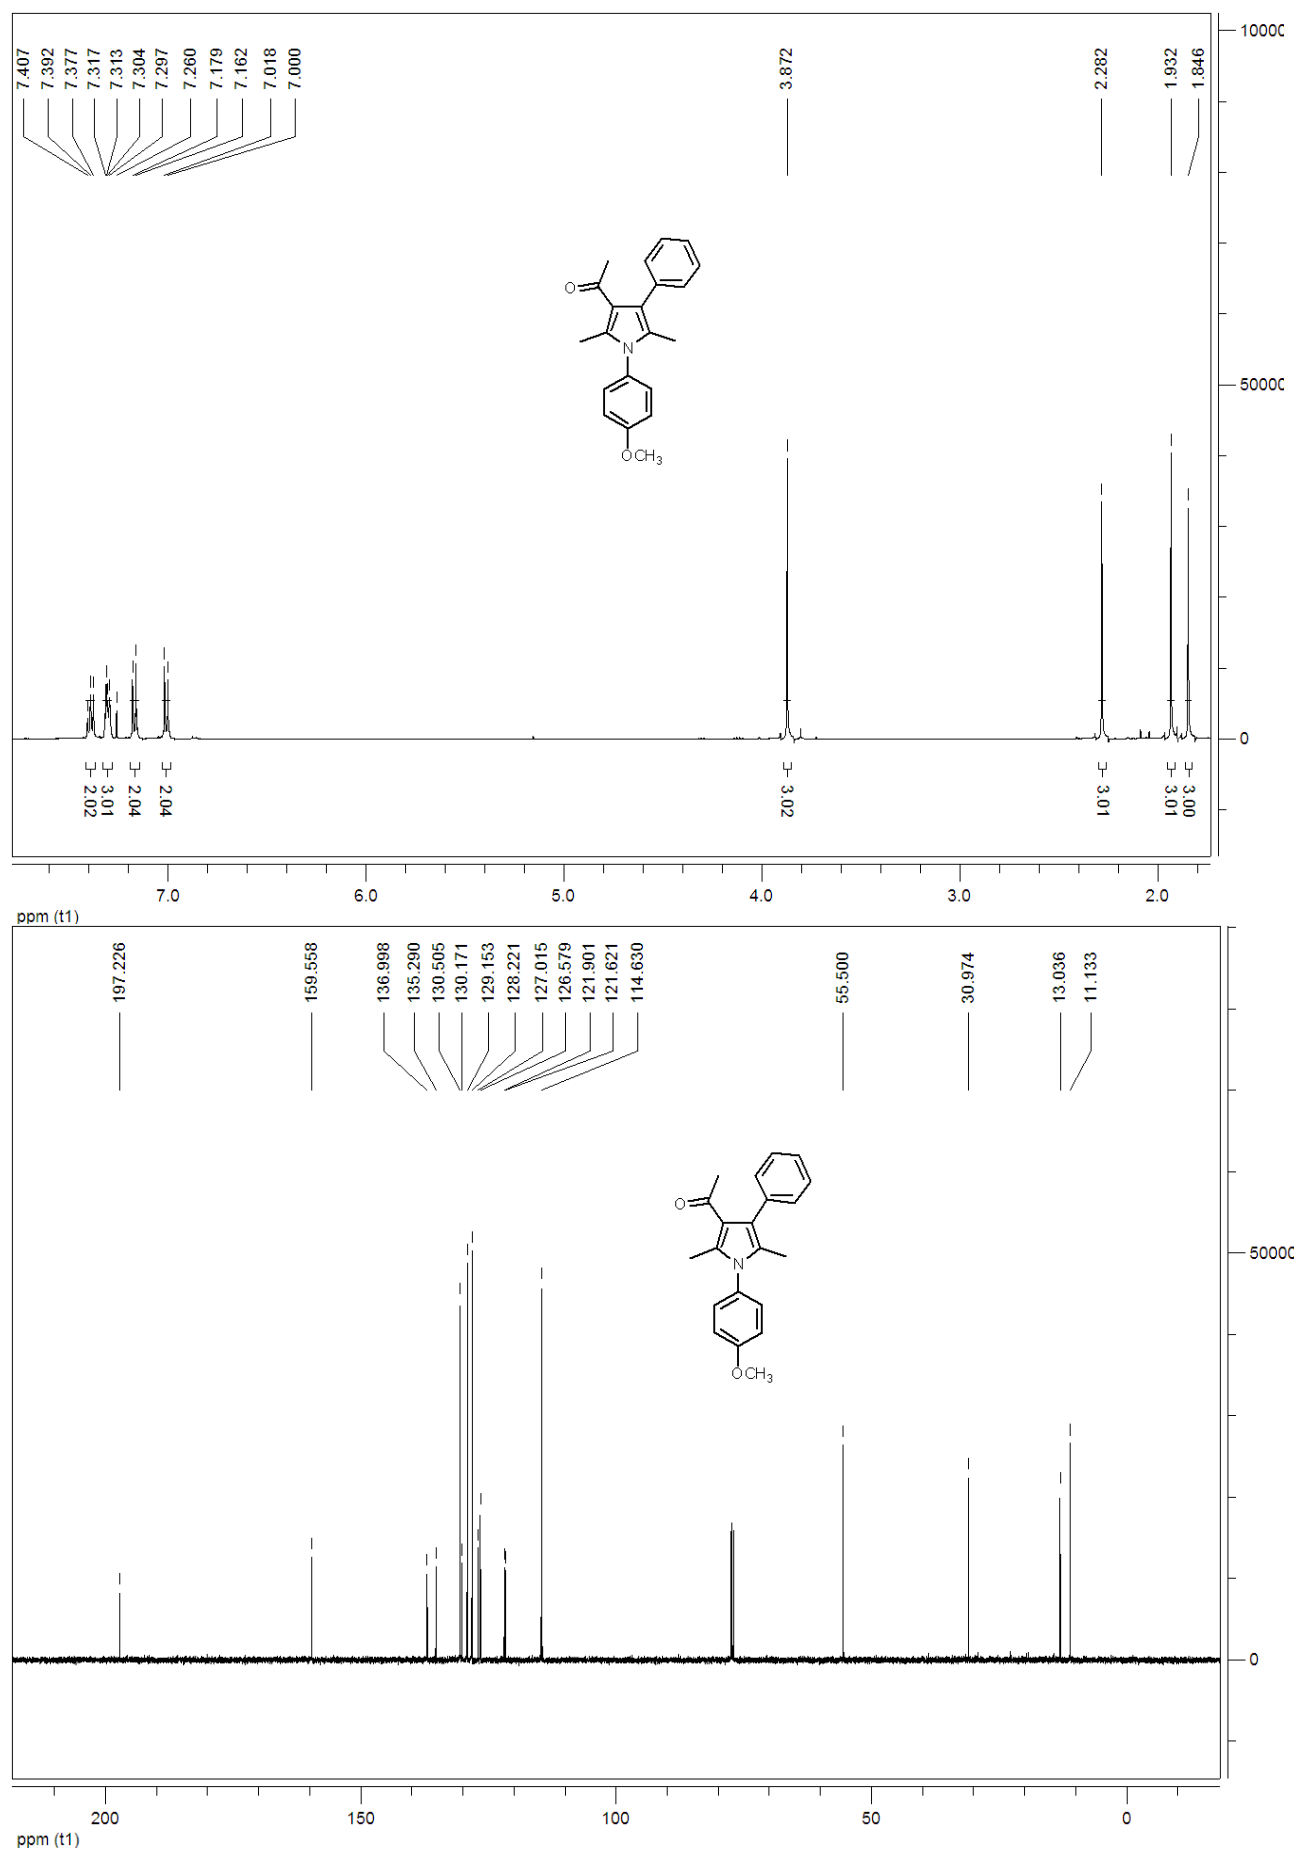

$^1\text{H}$  NMR and  $^{13}\text{C}$  NMR of compound **4u**

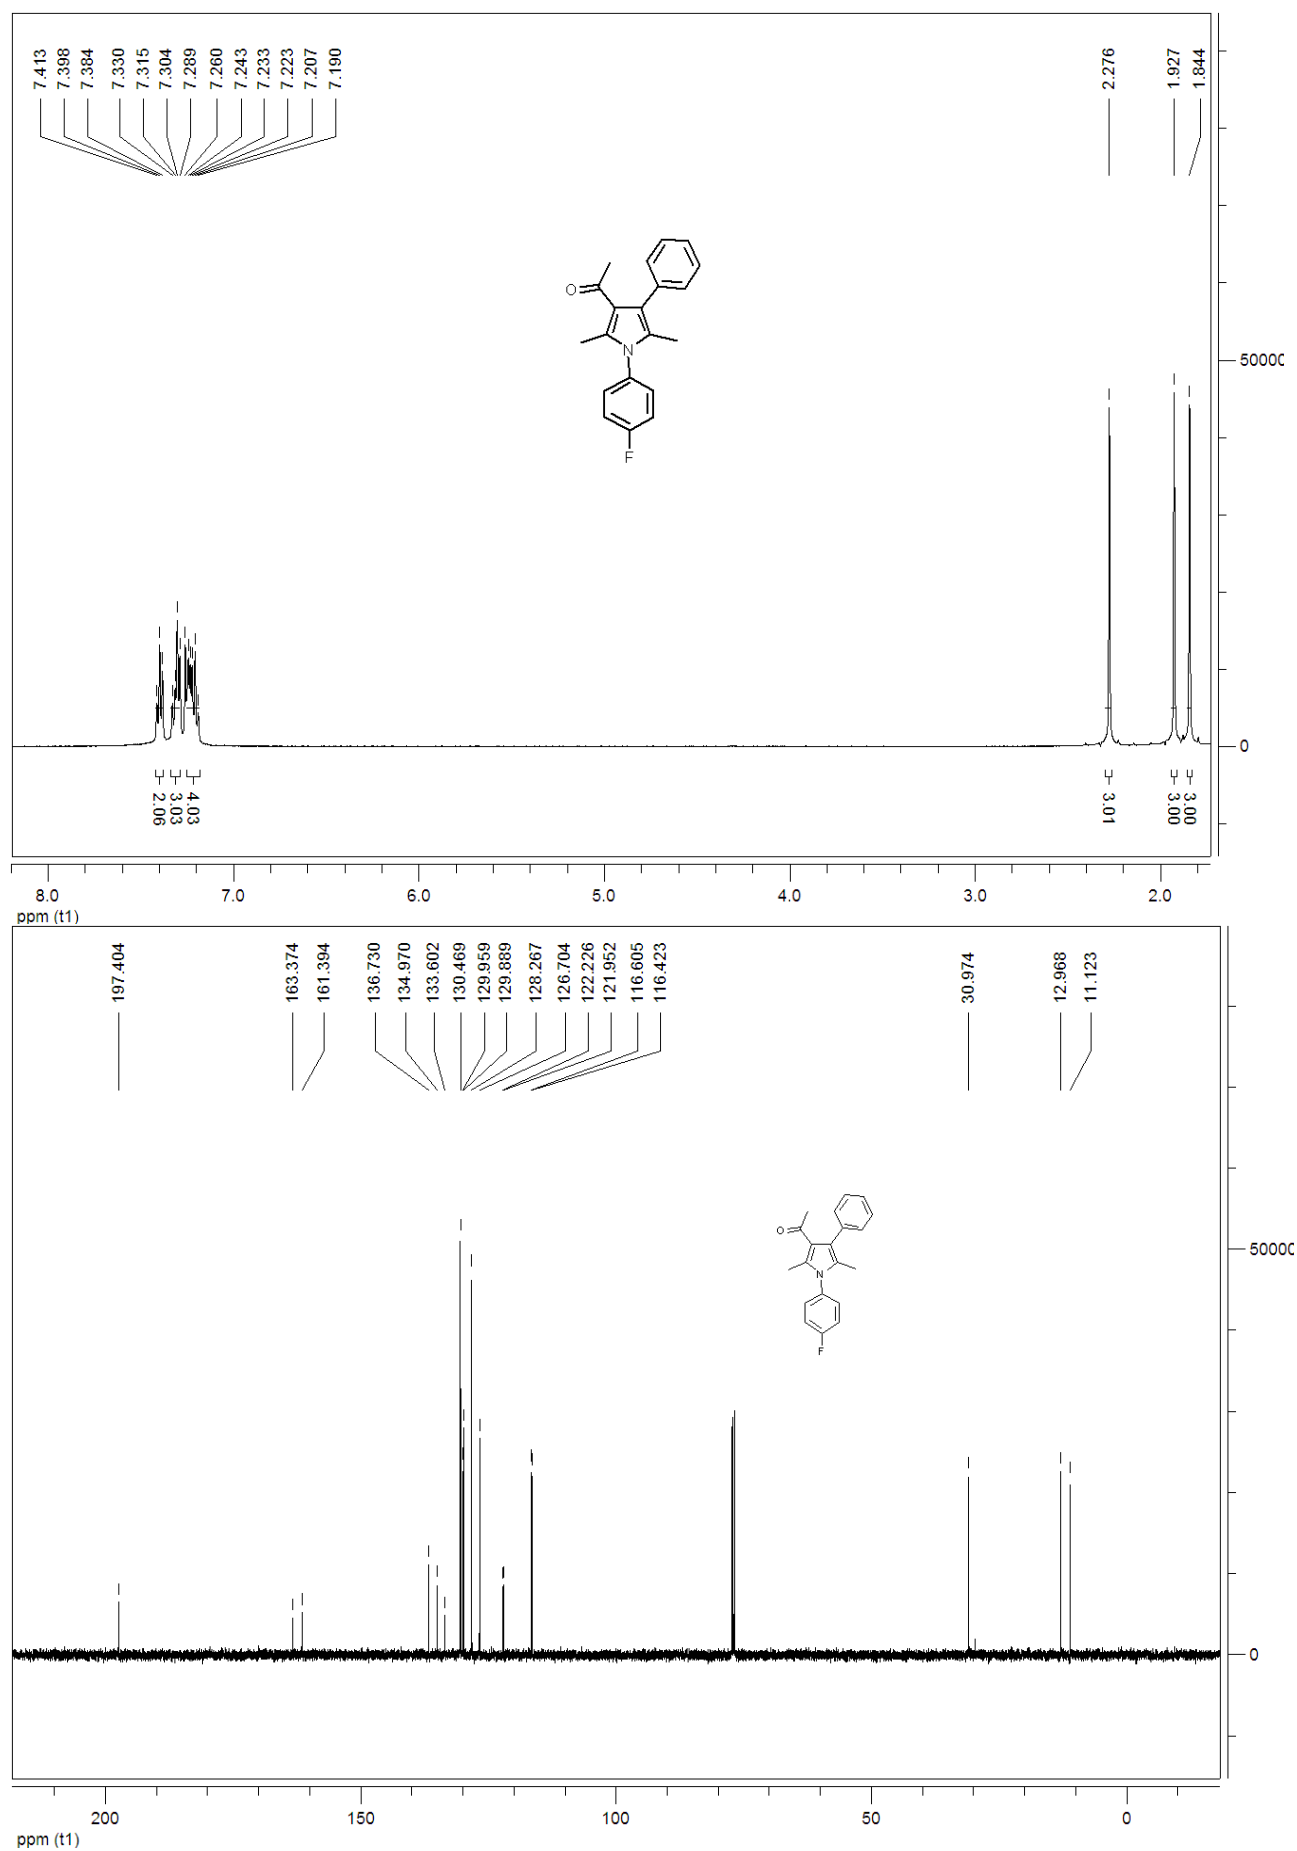

$^1\text{H}$  NMR and  $^{13}\text{C}$  NMR of compound **4v**

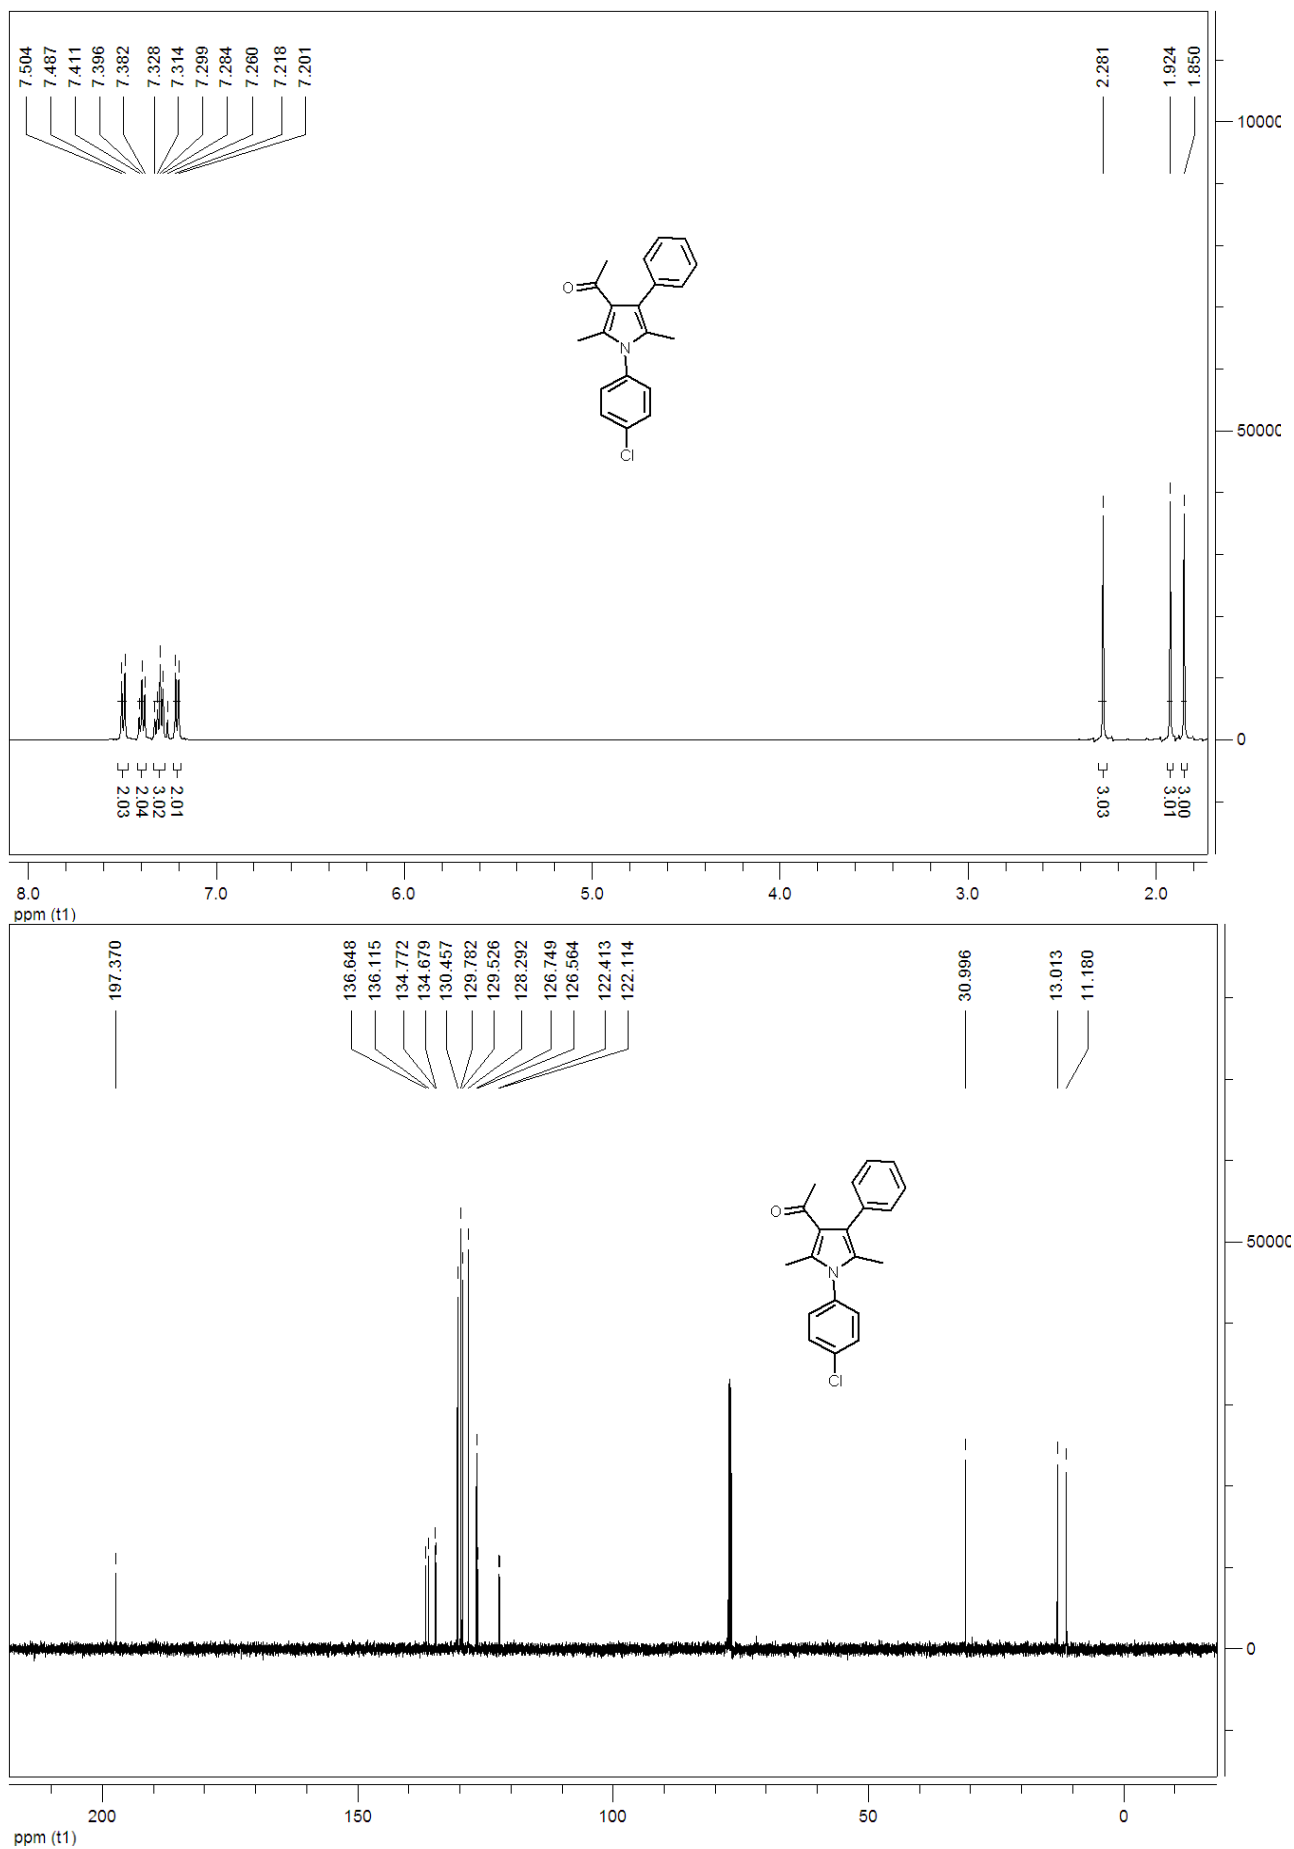

$^1\text{H}$  NMR and  $^{13}\text{C}$  NMR of compound **4w**

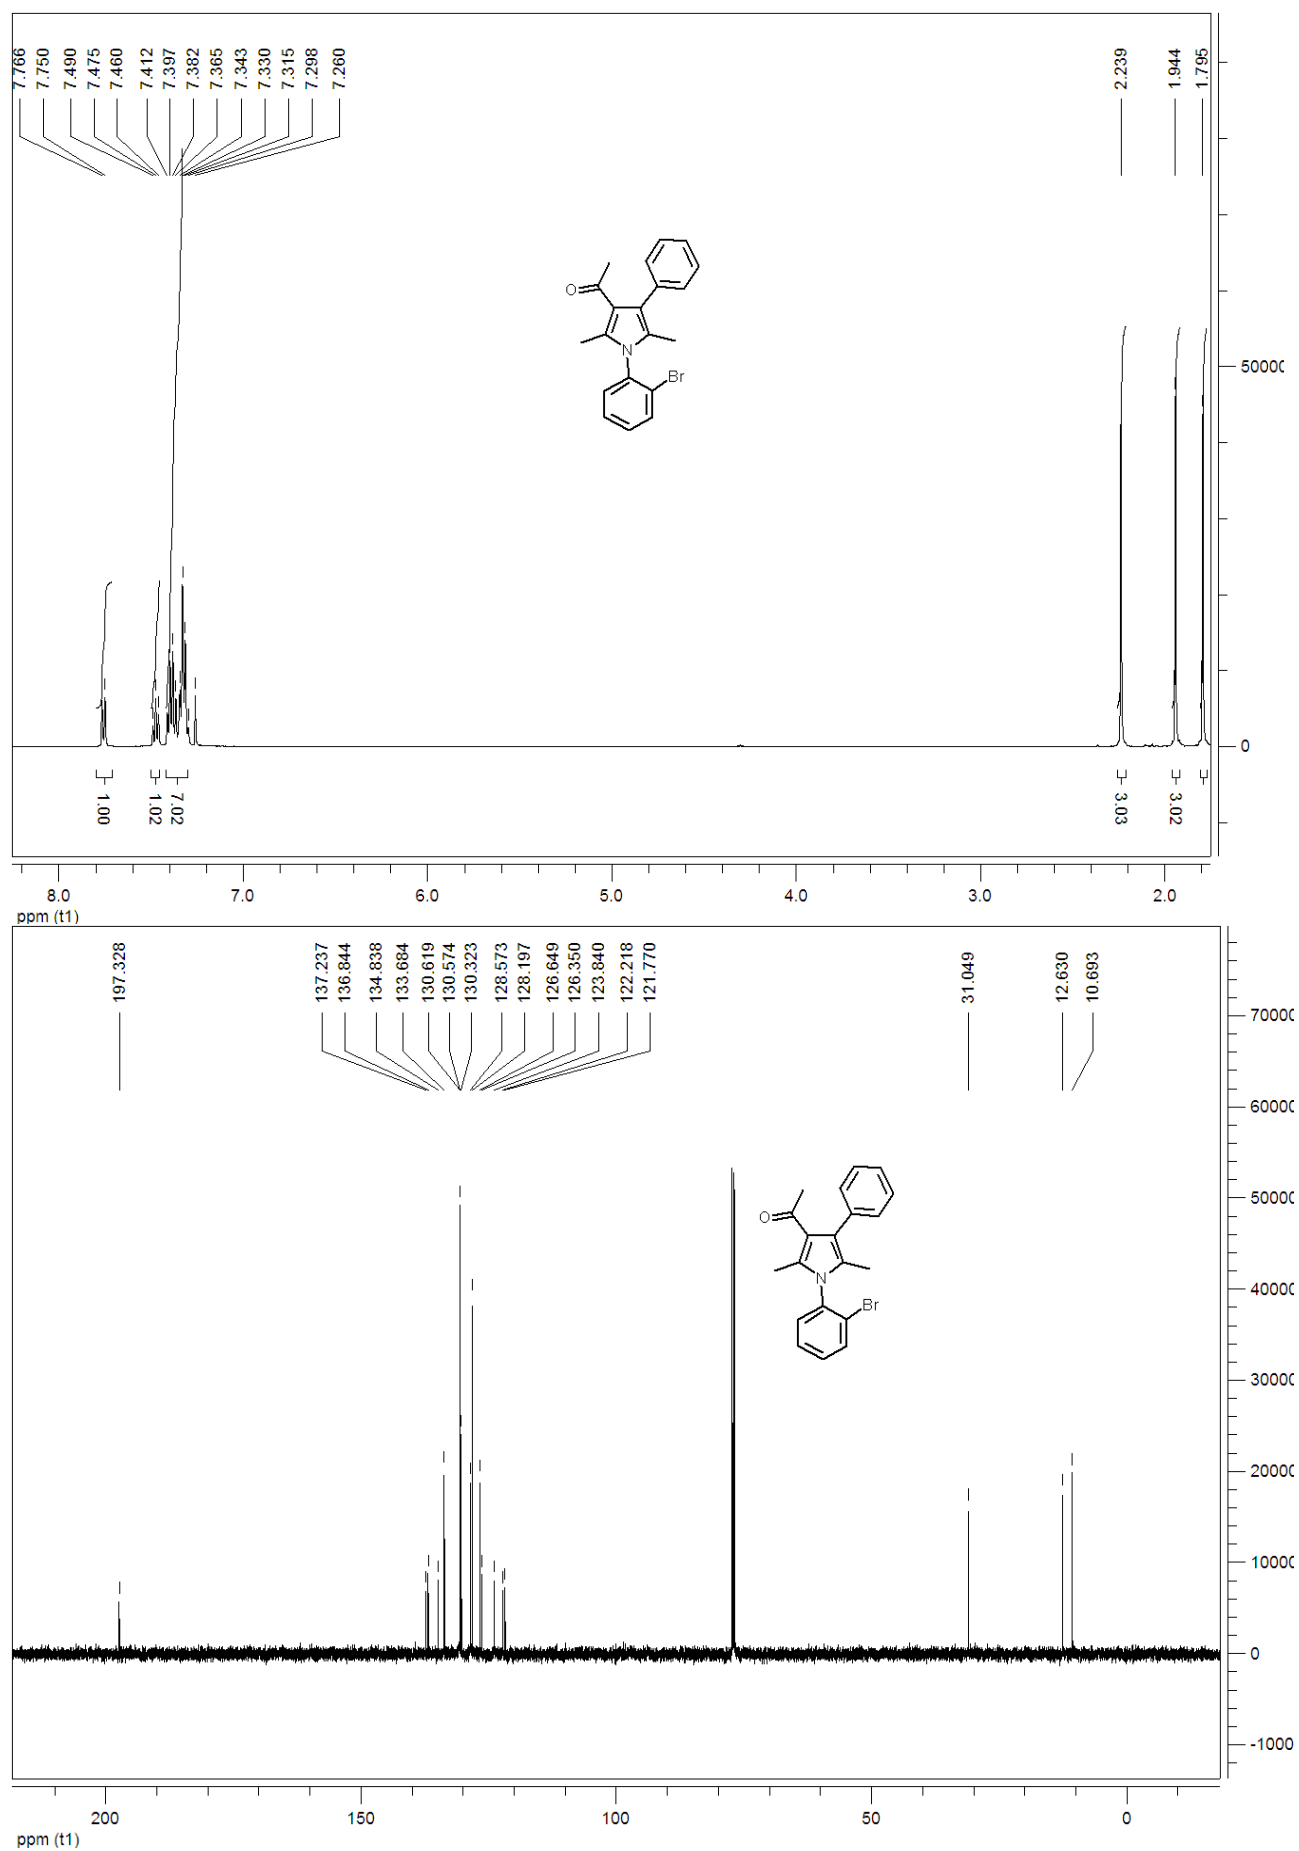

$^1\text{H}$  NMR and  $^{13}\text{C}$  NMR of compound **4x**

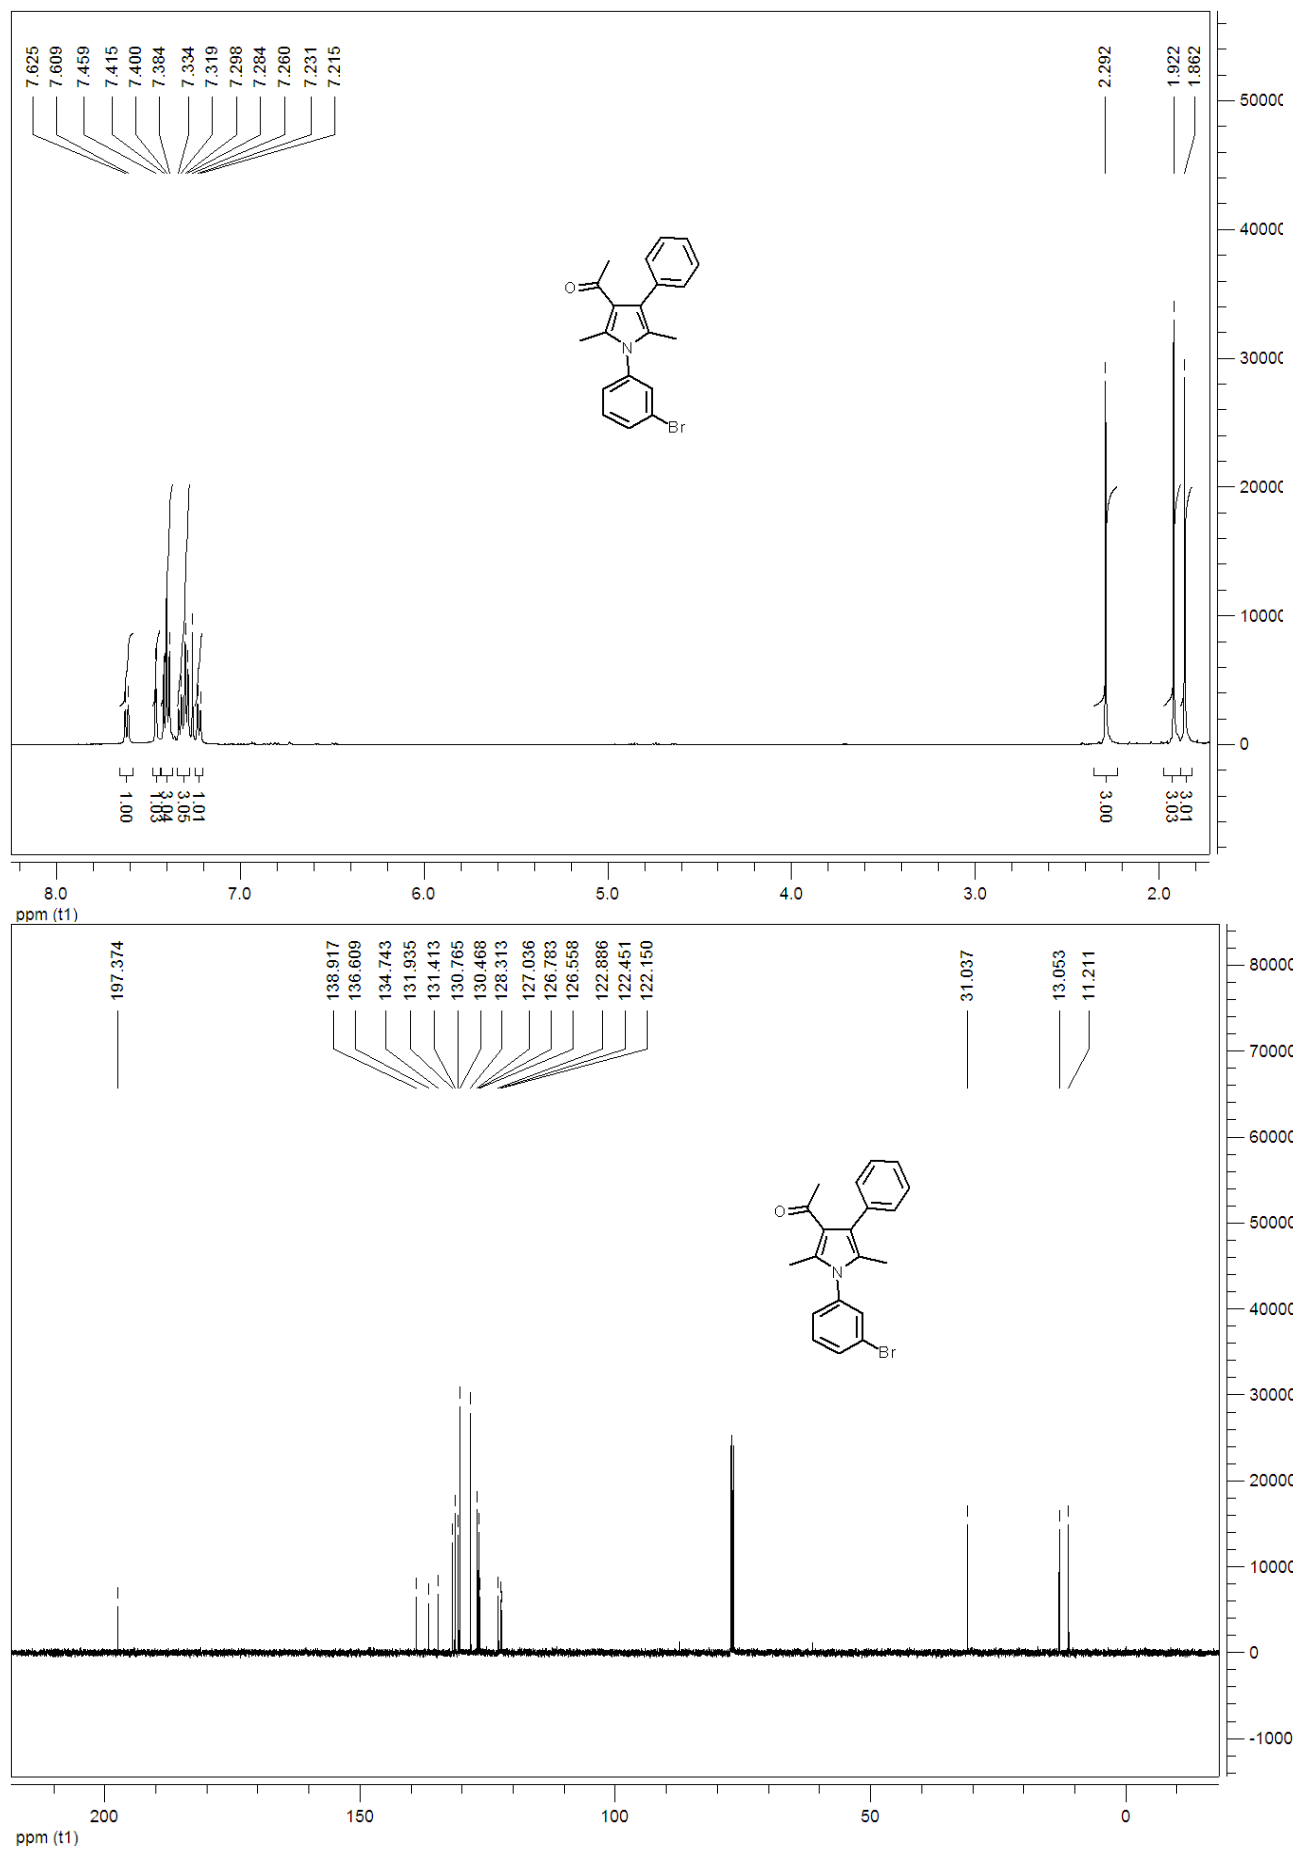

$^1\text{H}$  NMR and  $^{13}\text{C}$  NMR of compound **4y**

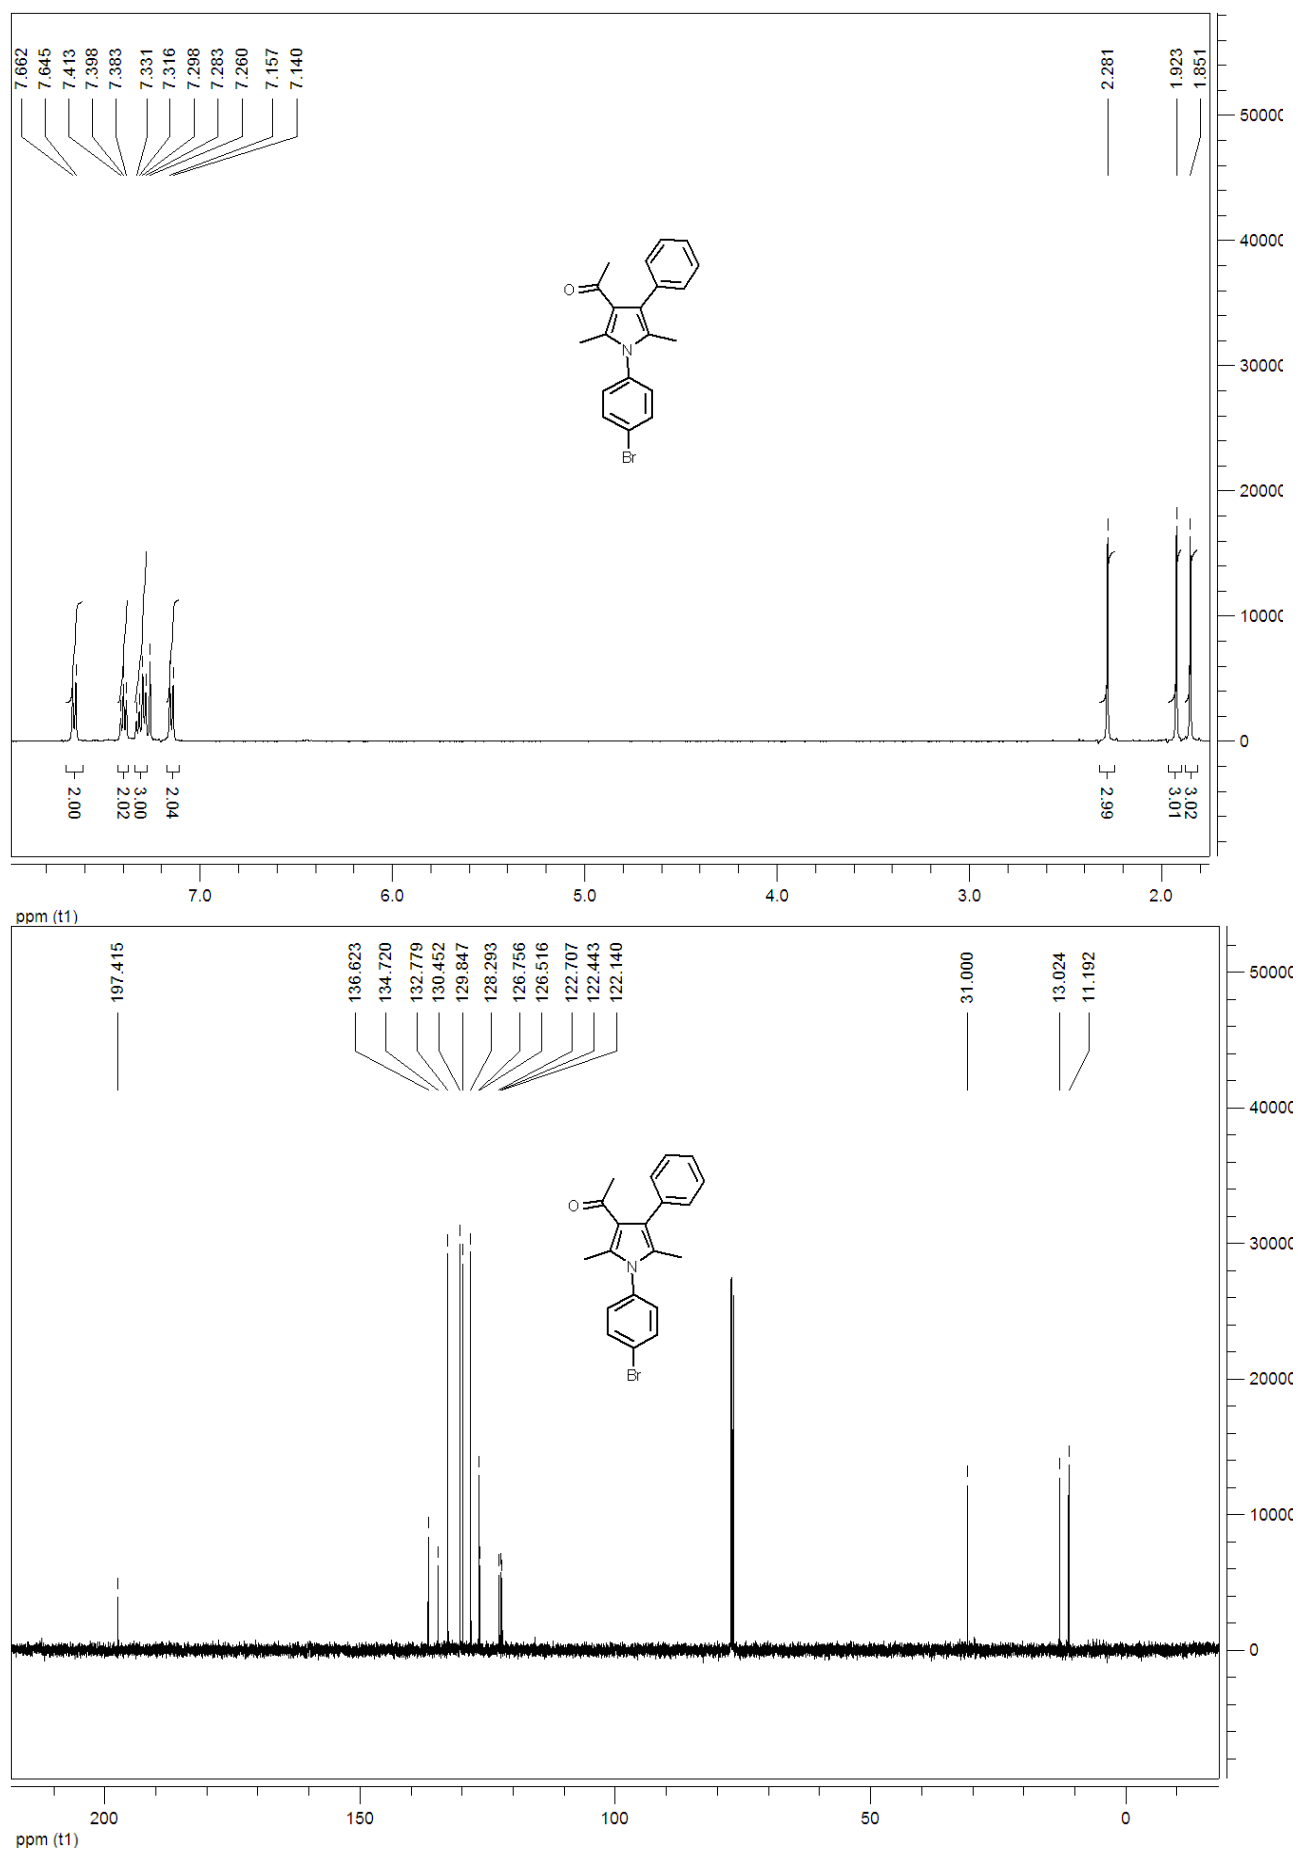

<sup>1</sup>H NMR and <sup>13</sup>C NMR of compound **4z**

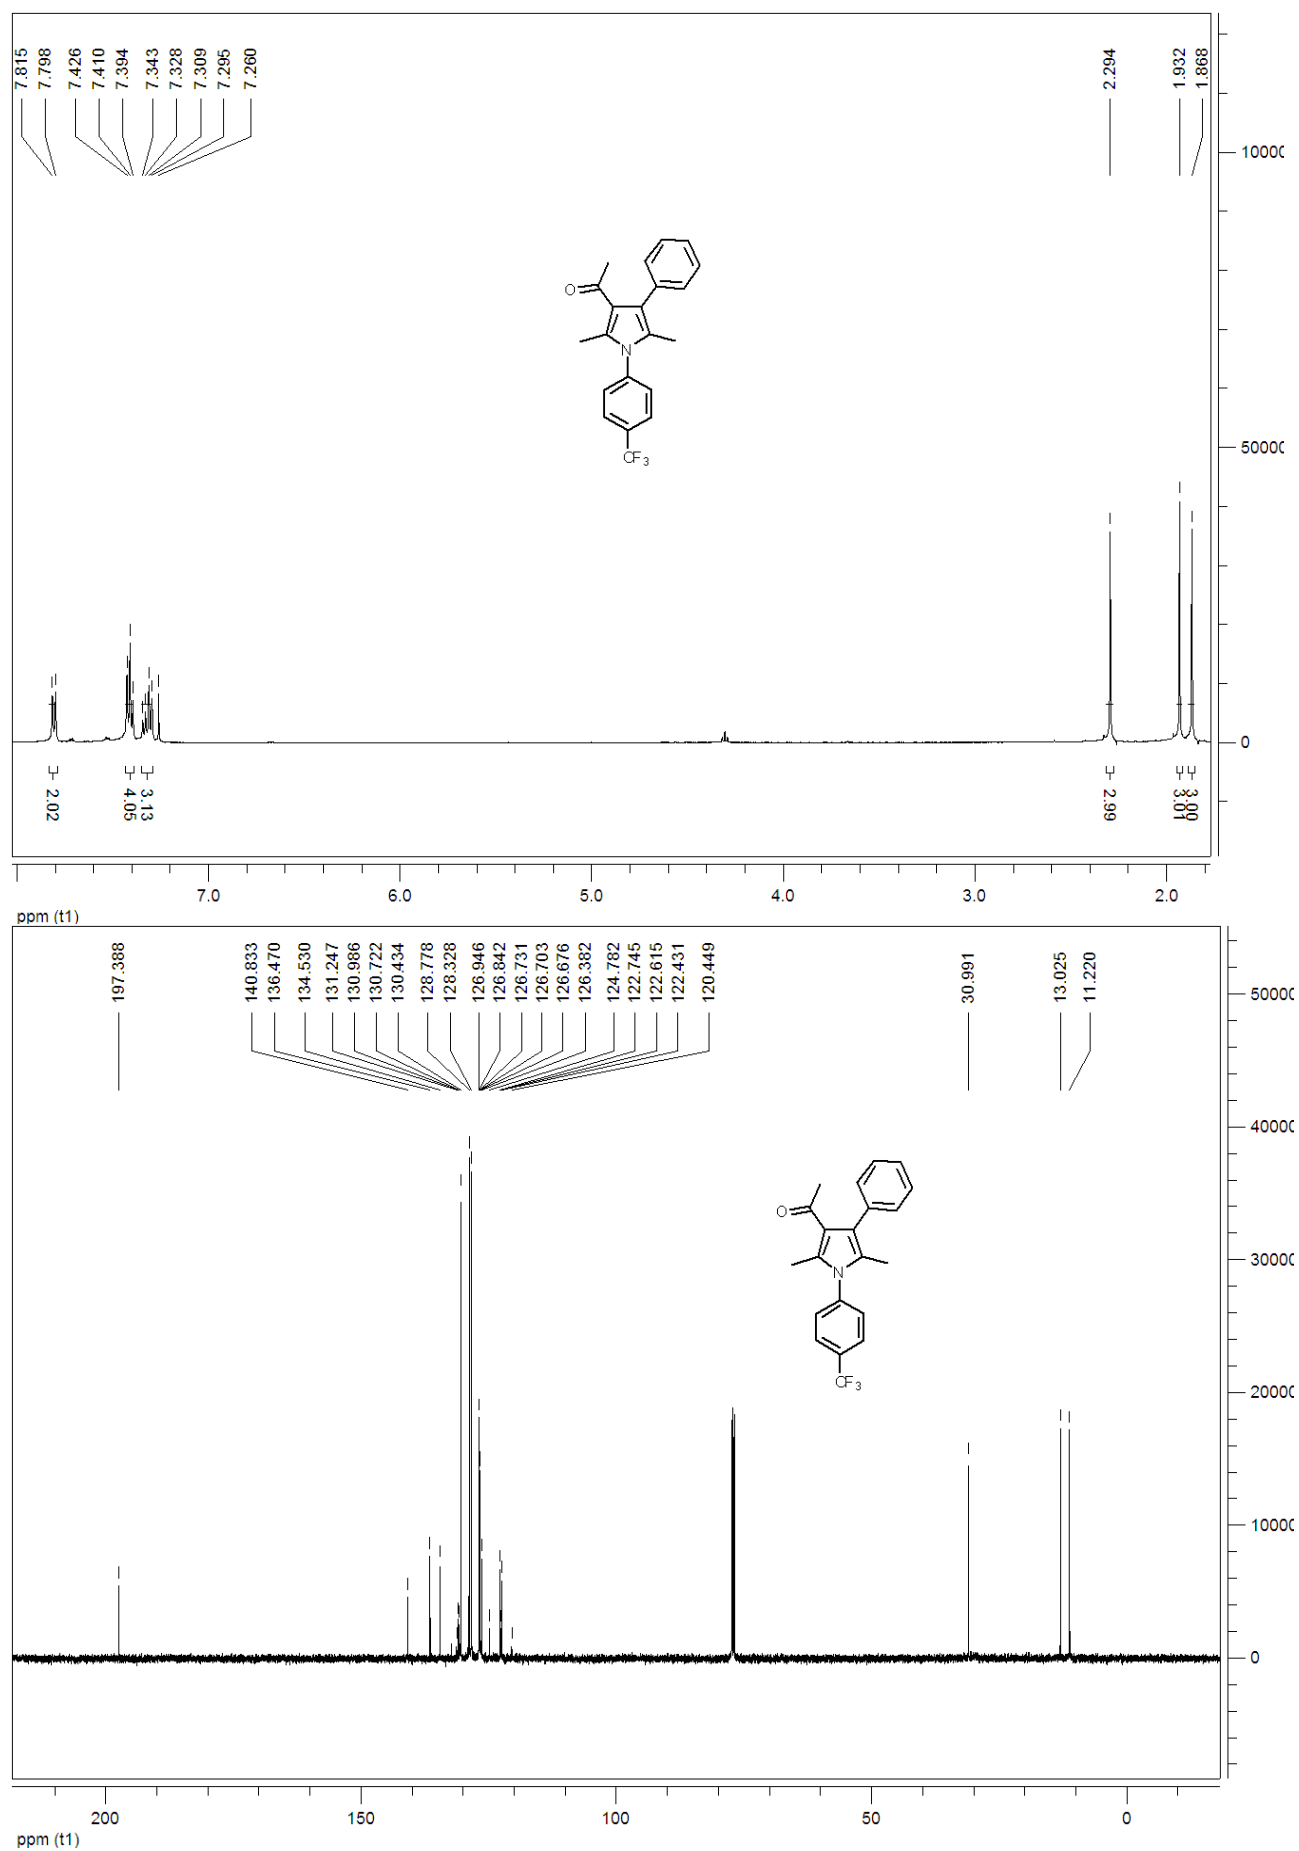

<sup>1</sup>H NMR and <sup>13</sup>C NMR of compound **4aa**

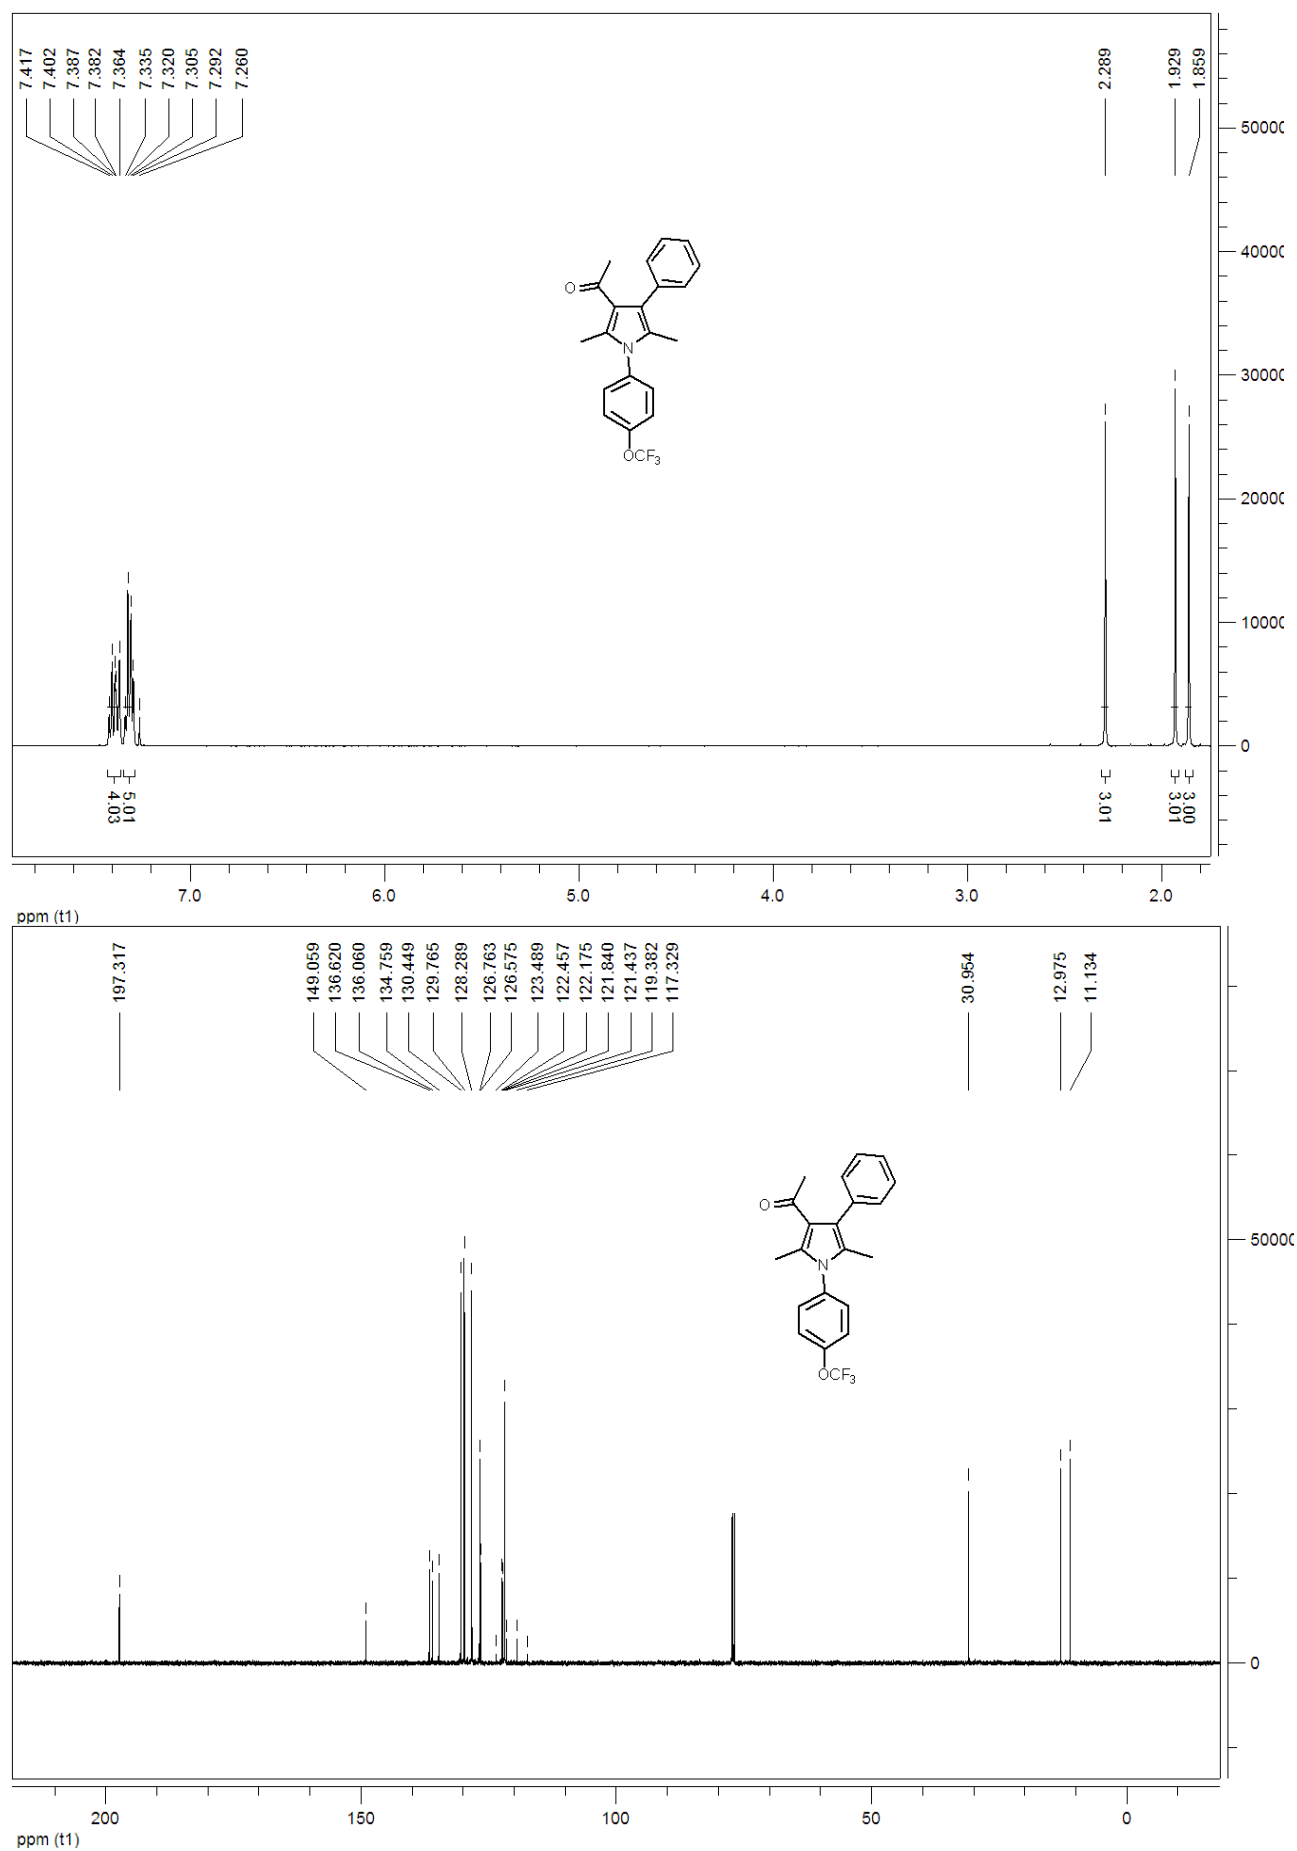

$^1\text{H}$  NMR and  $^{13}\text{C}$  NMR of compound **4ab**

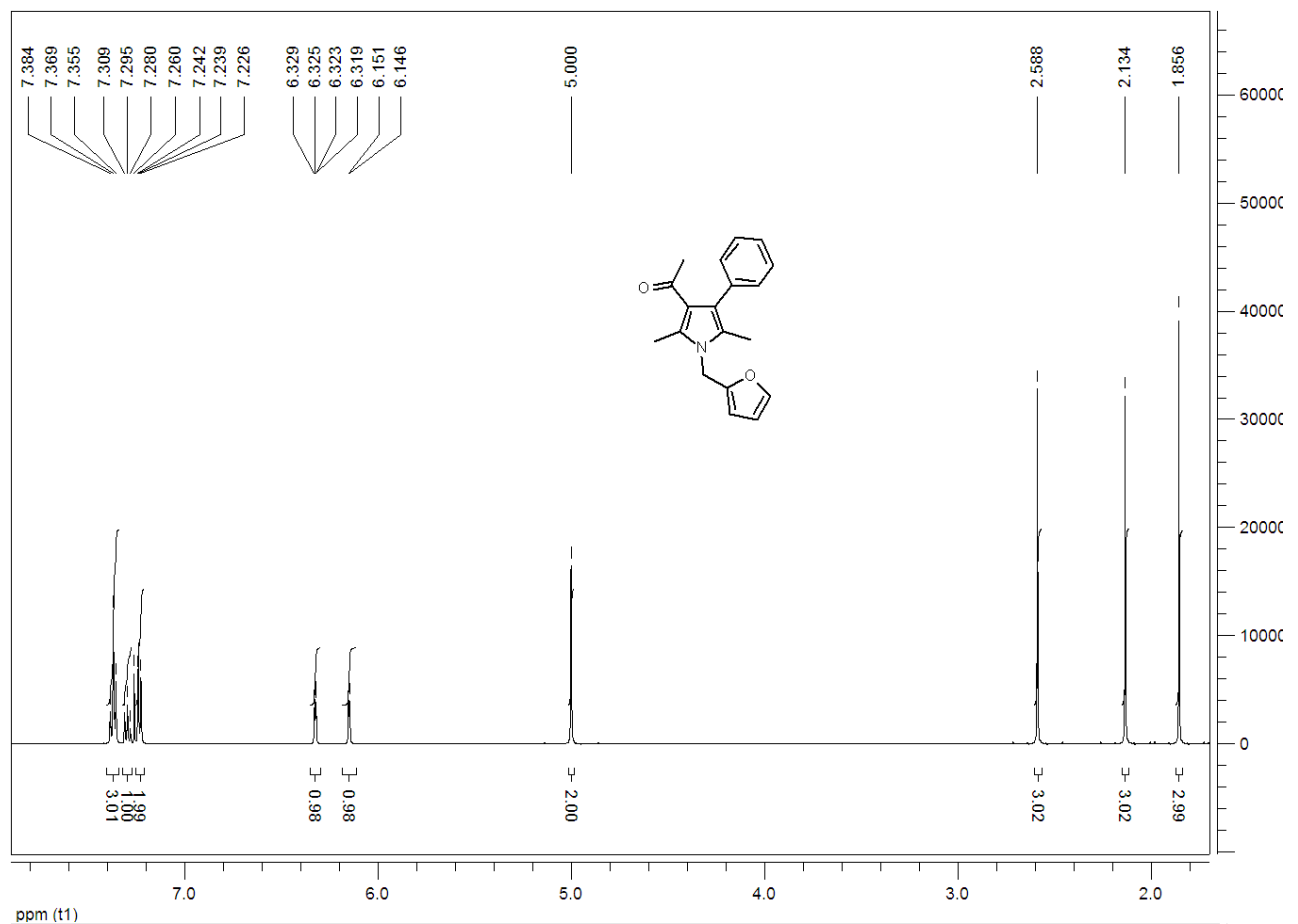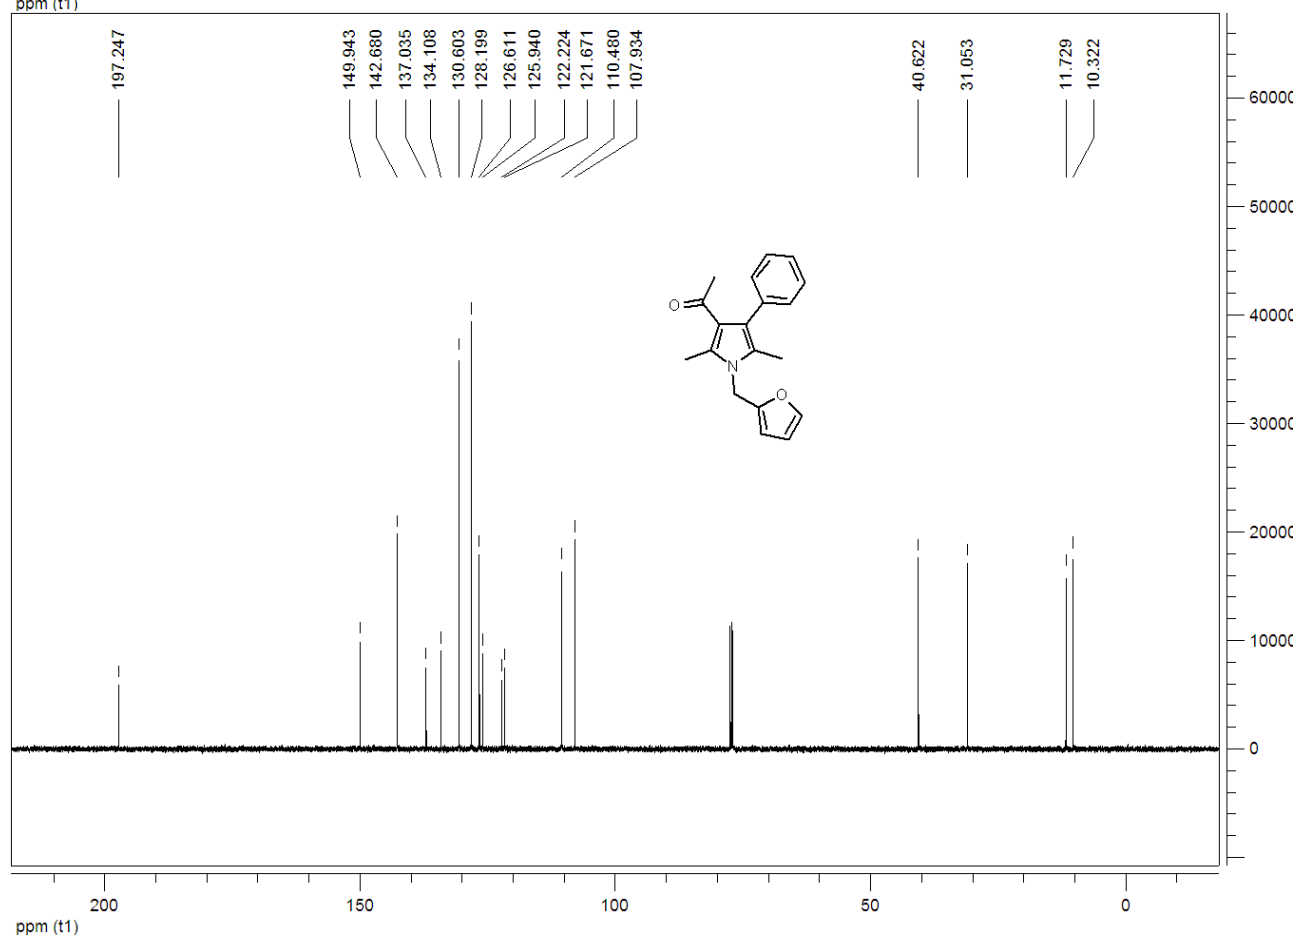

$^1\text{H}$  NMR and  $^{13}\text{C}$  NMR of compound **4ac**

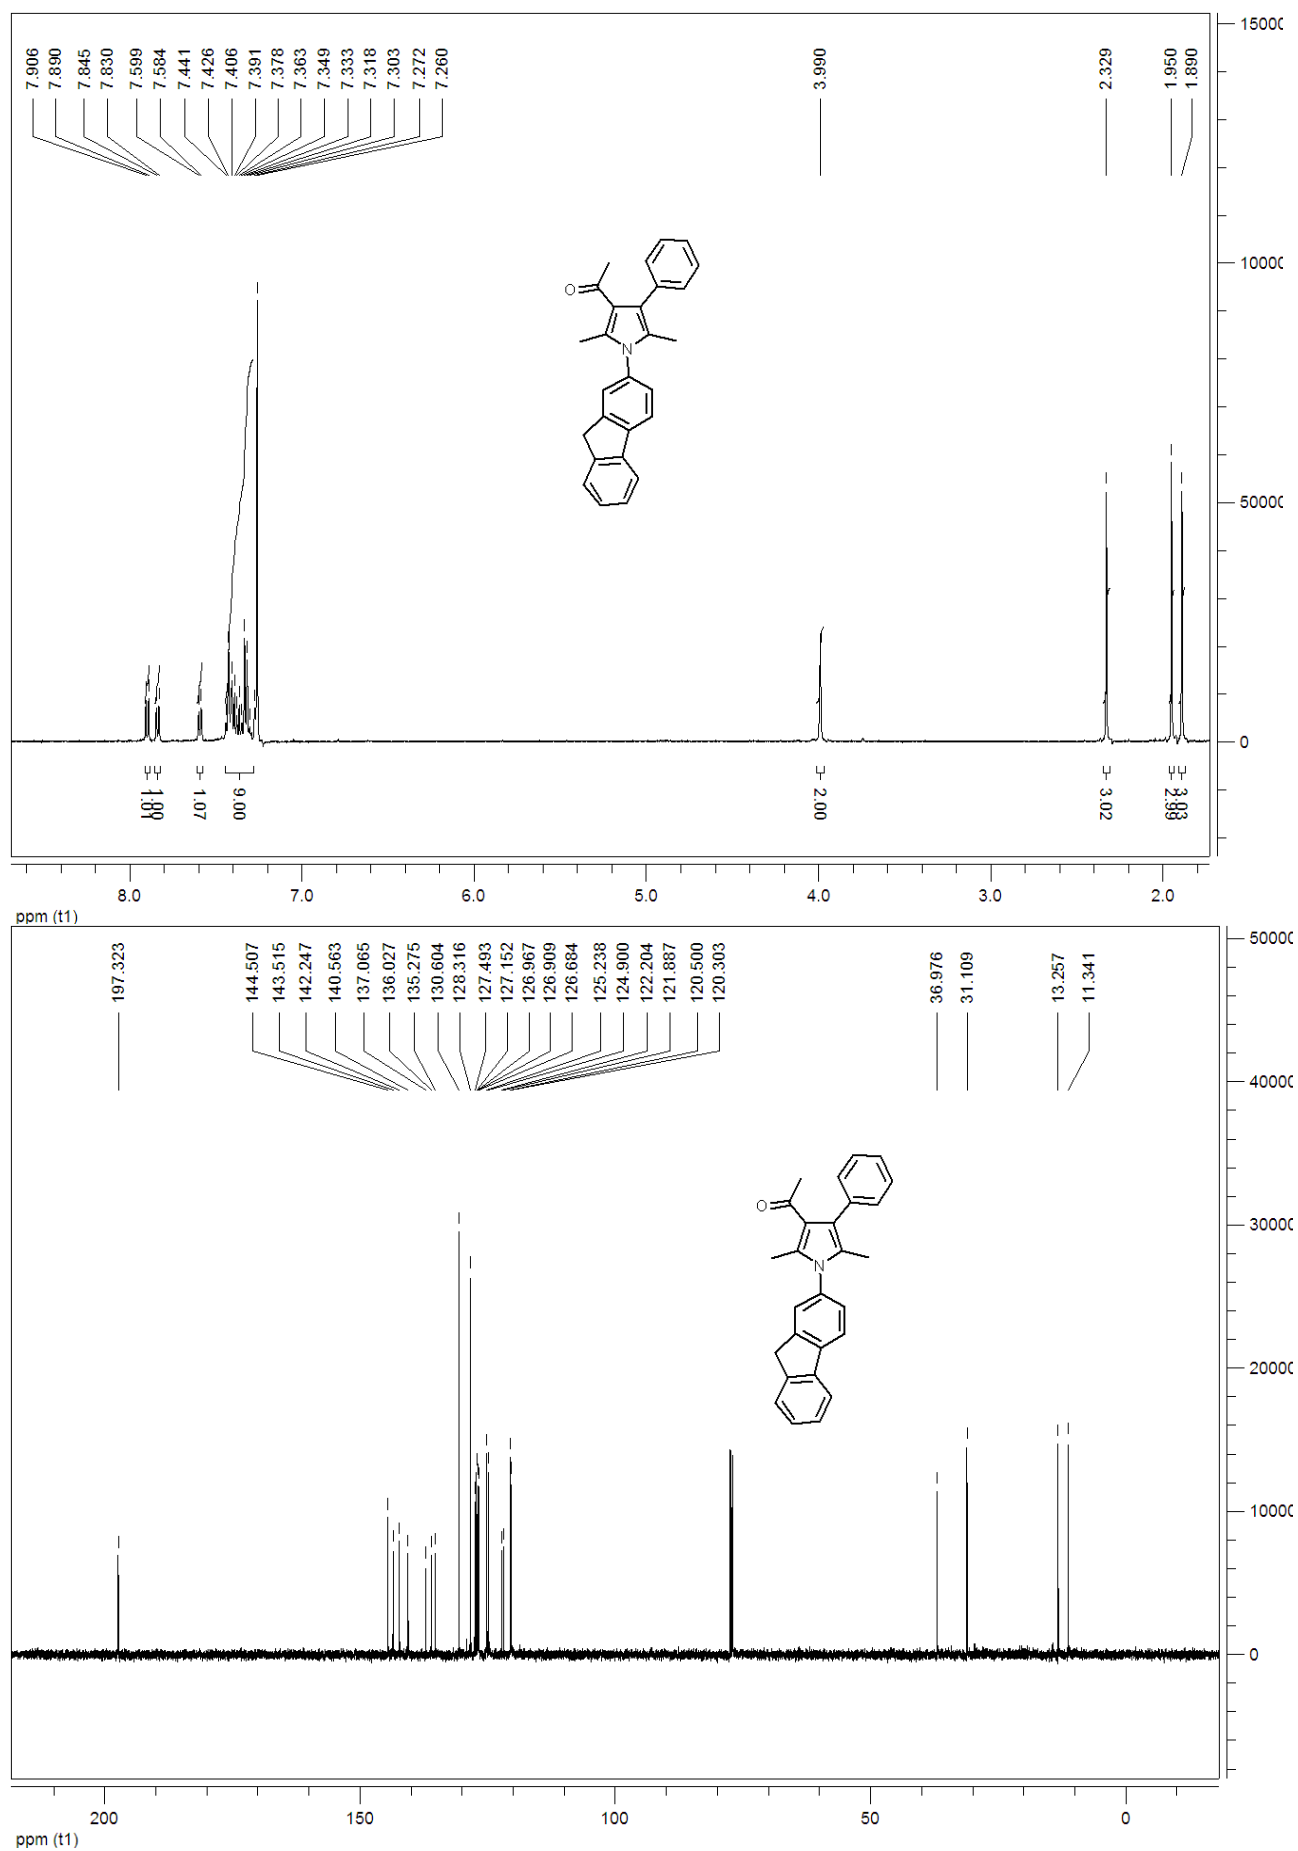

$^1\text{H}$  NMR and  $^{13}\text{C}$  NMR of compound **4ad**

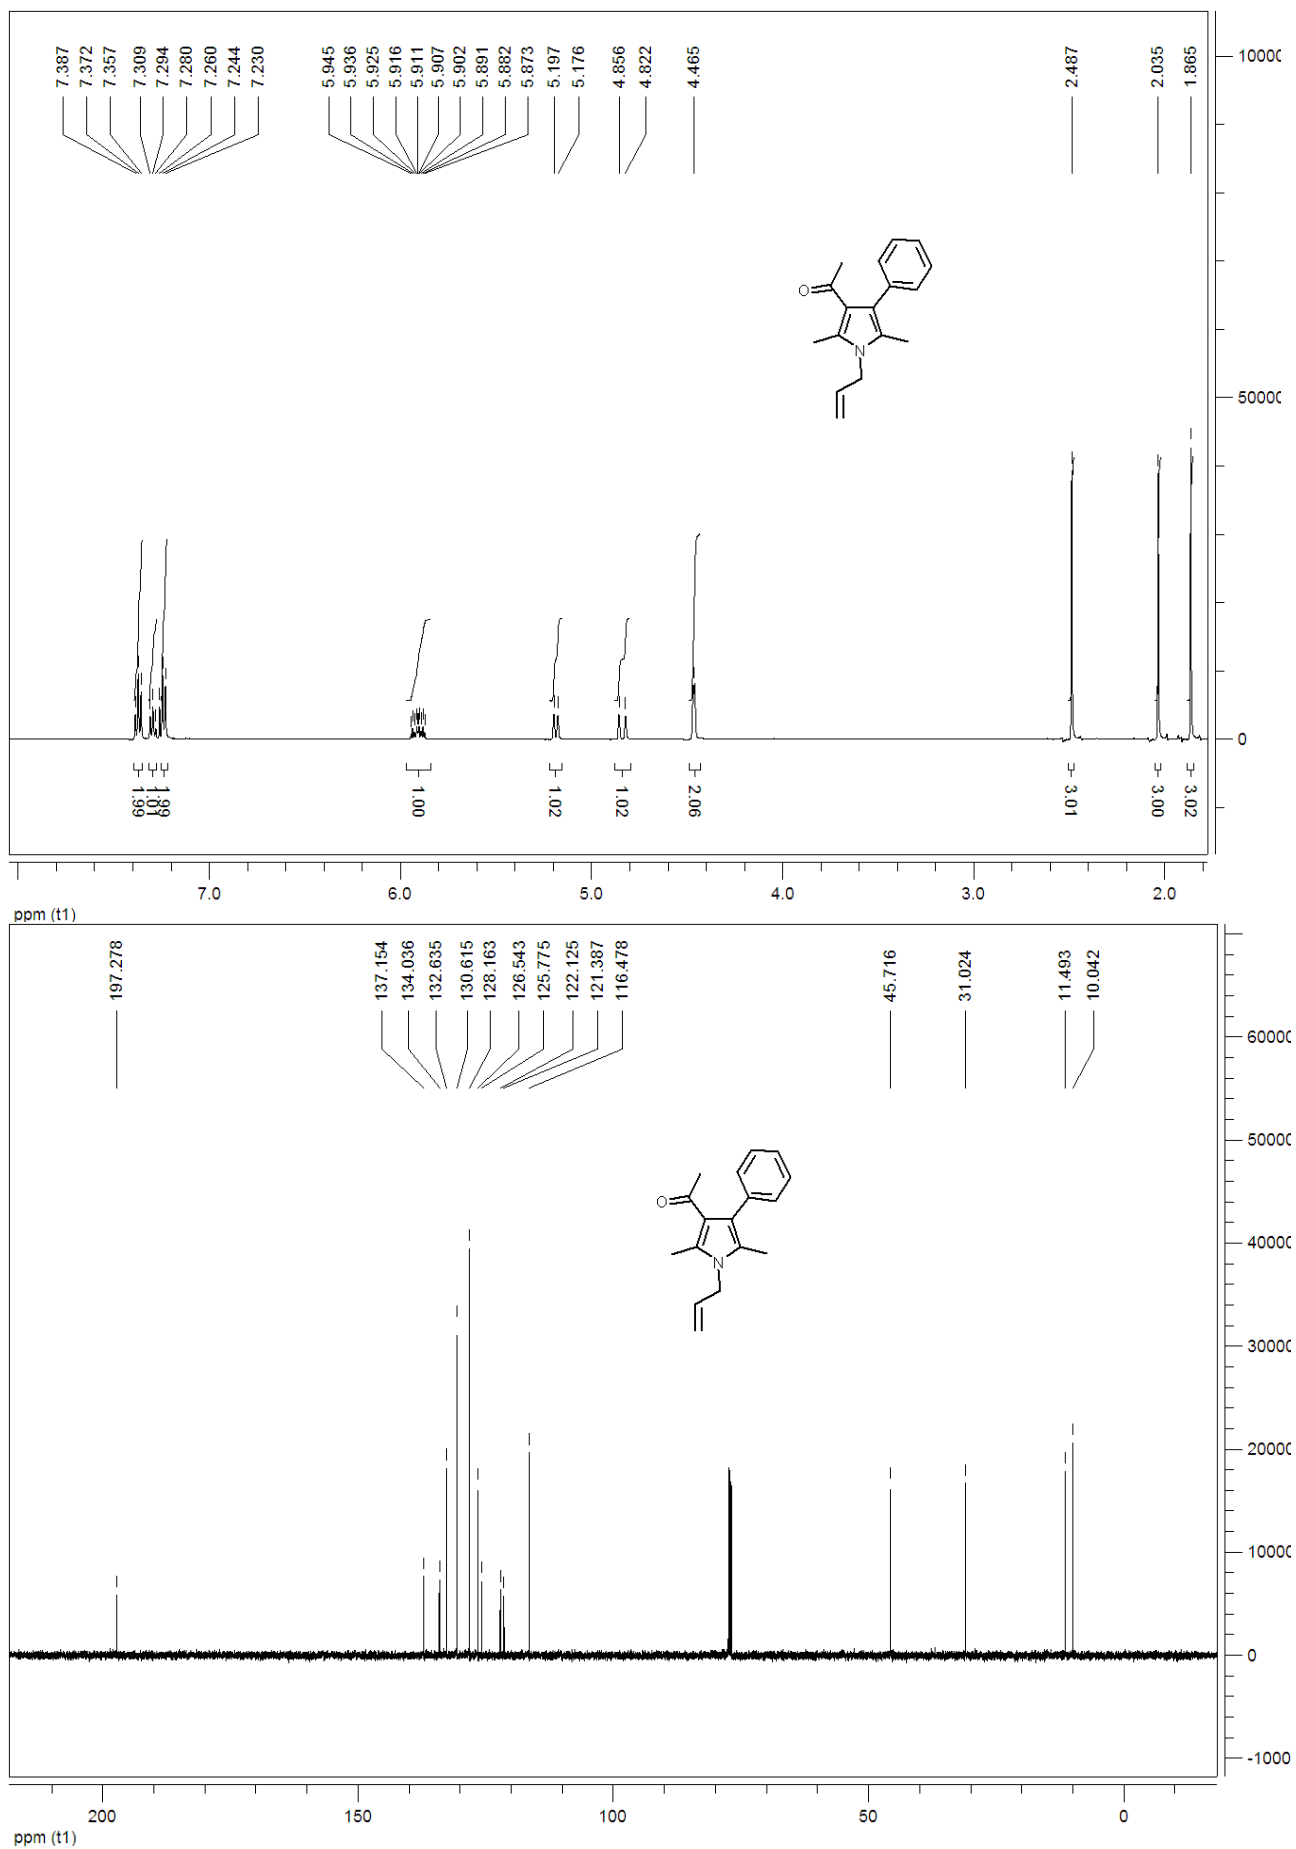

$^1\text{H}$  NMR and  $^{13}\text{C}$  NMR of compound **4ae**

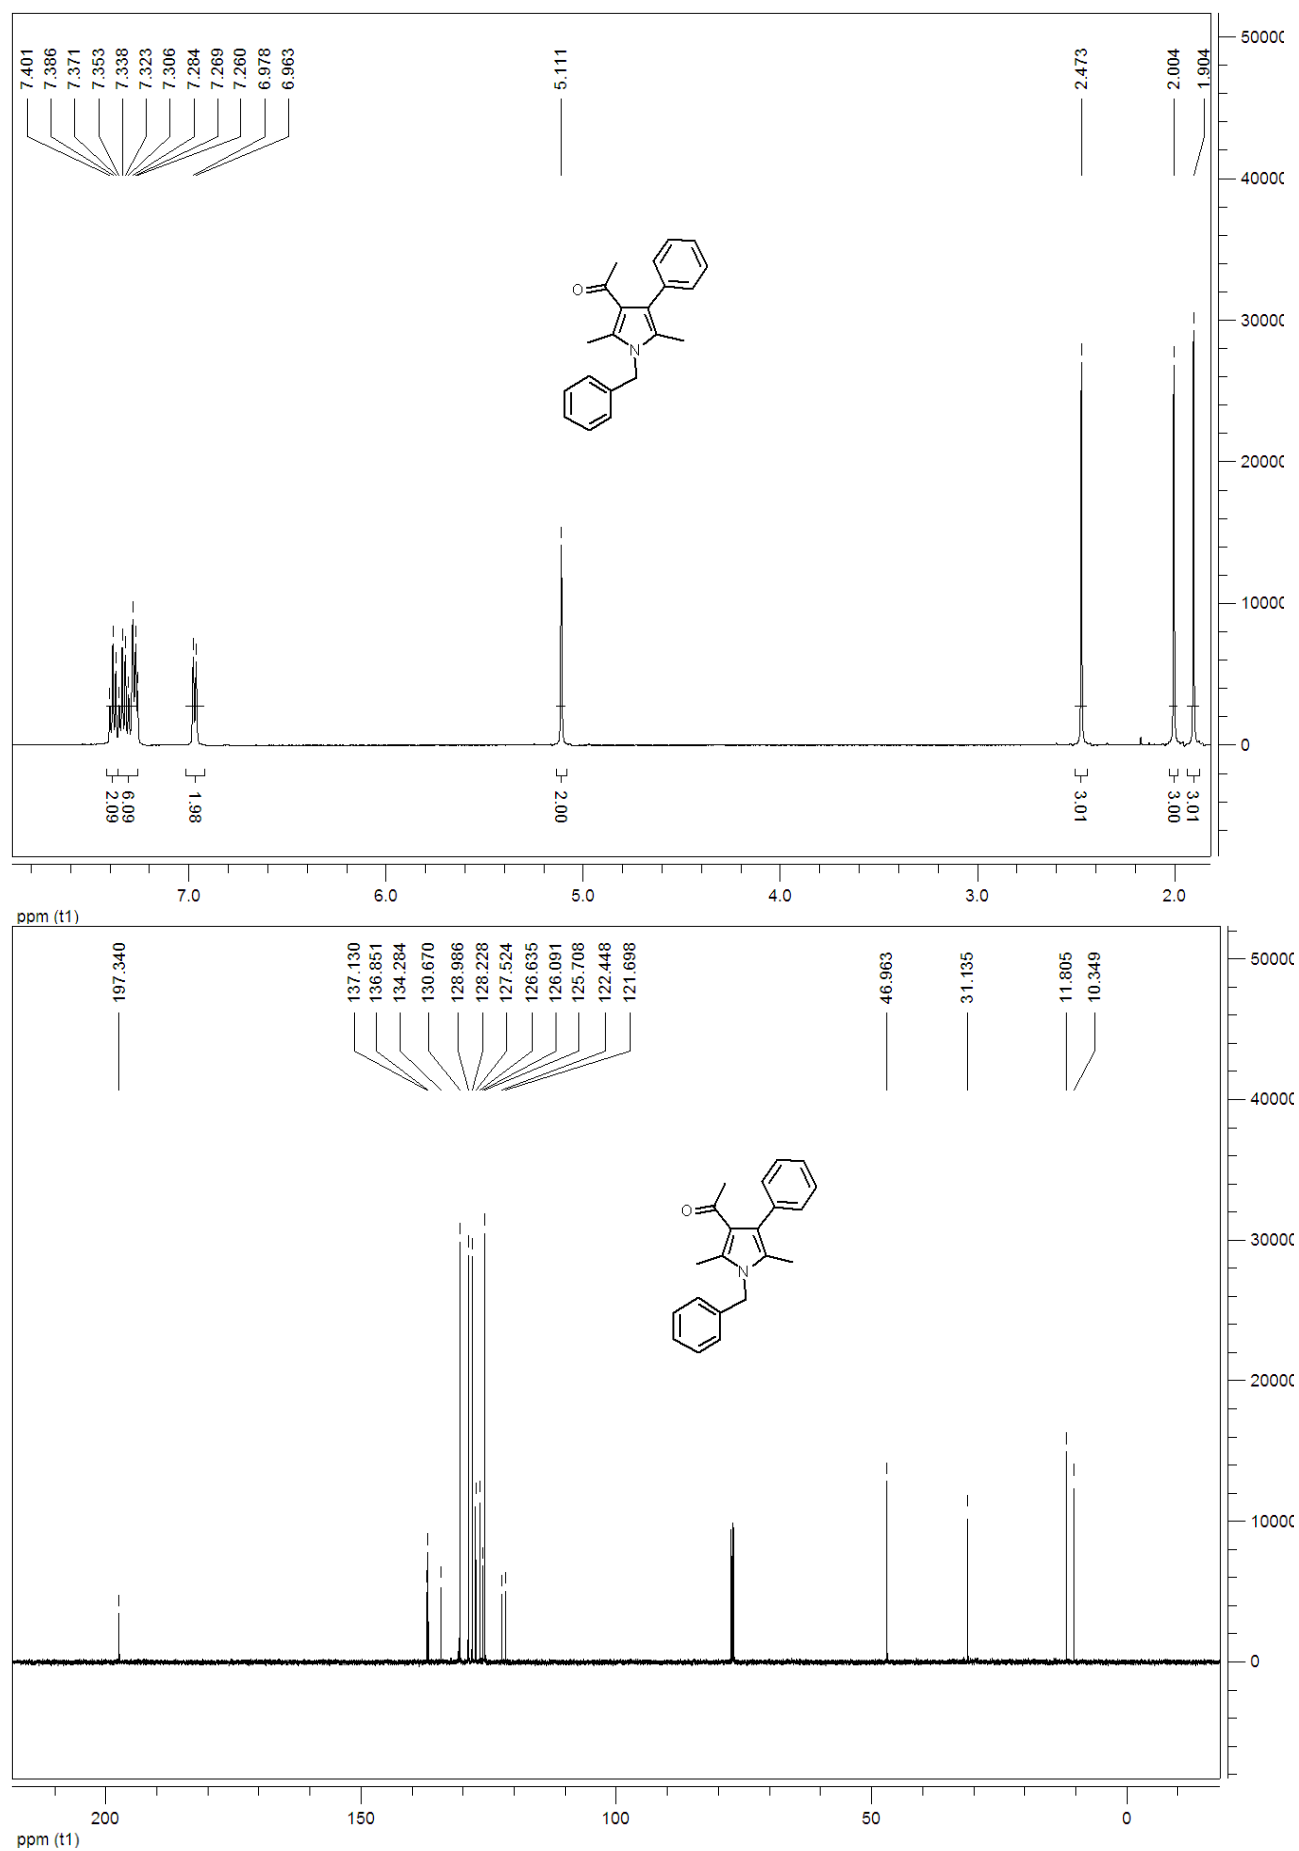

$^1\text{H}$  NMR and  $^{13}\text{C}$  NMR of compound **4af**

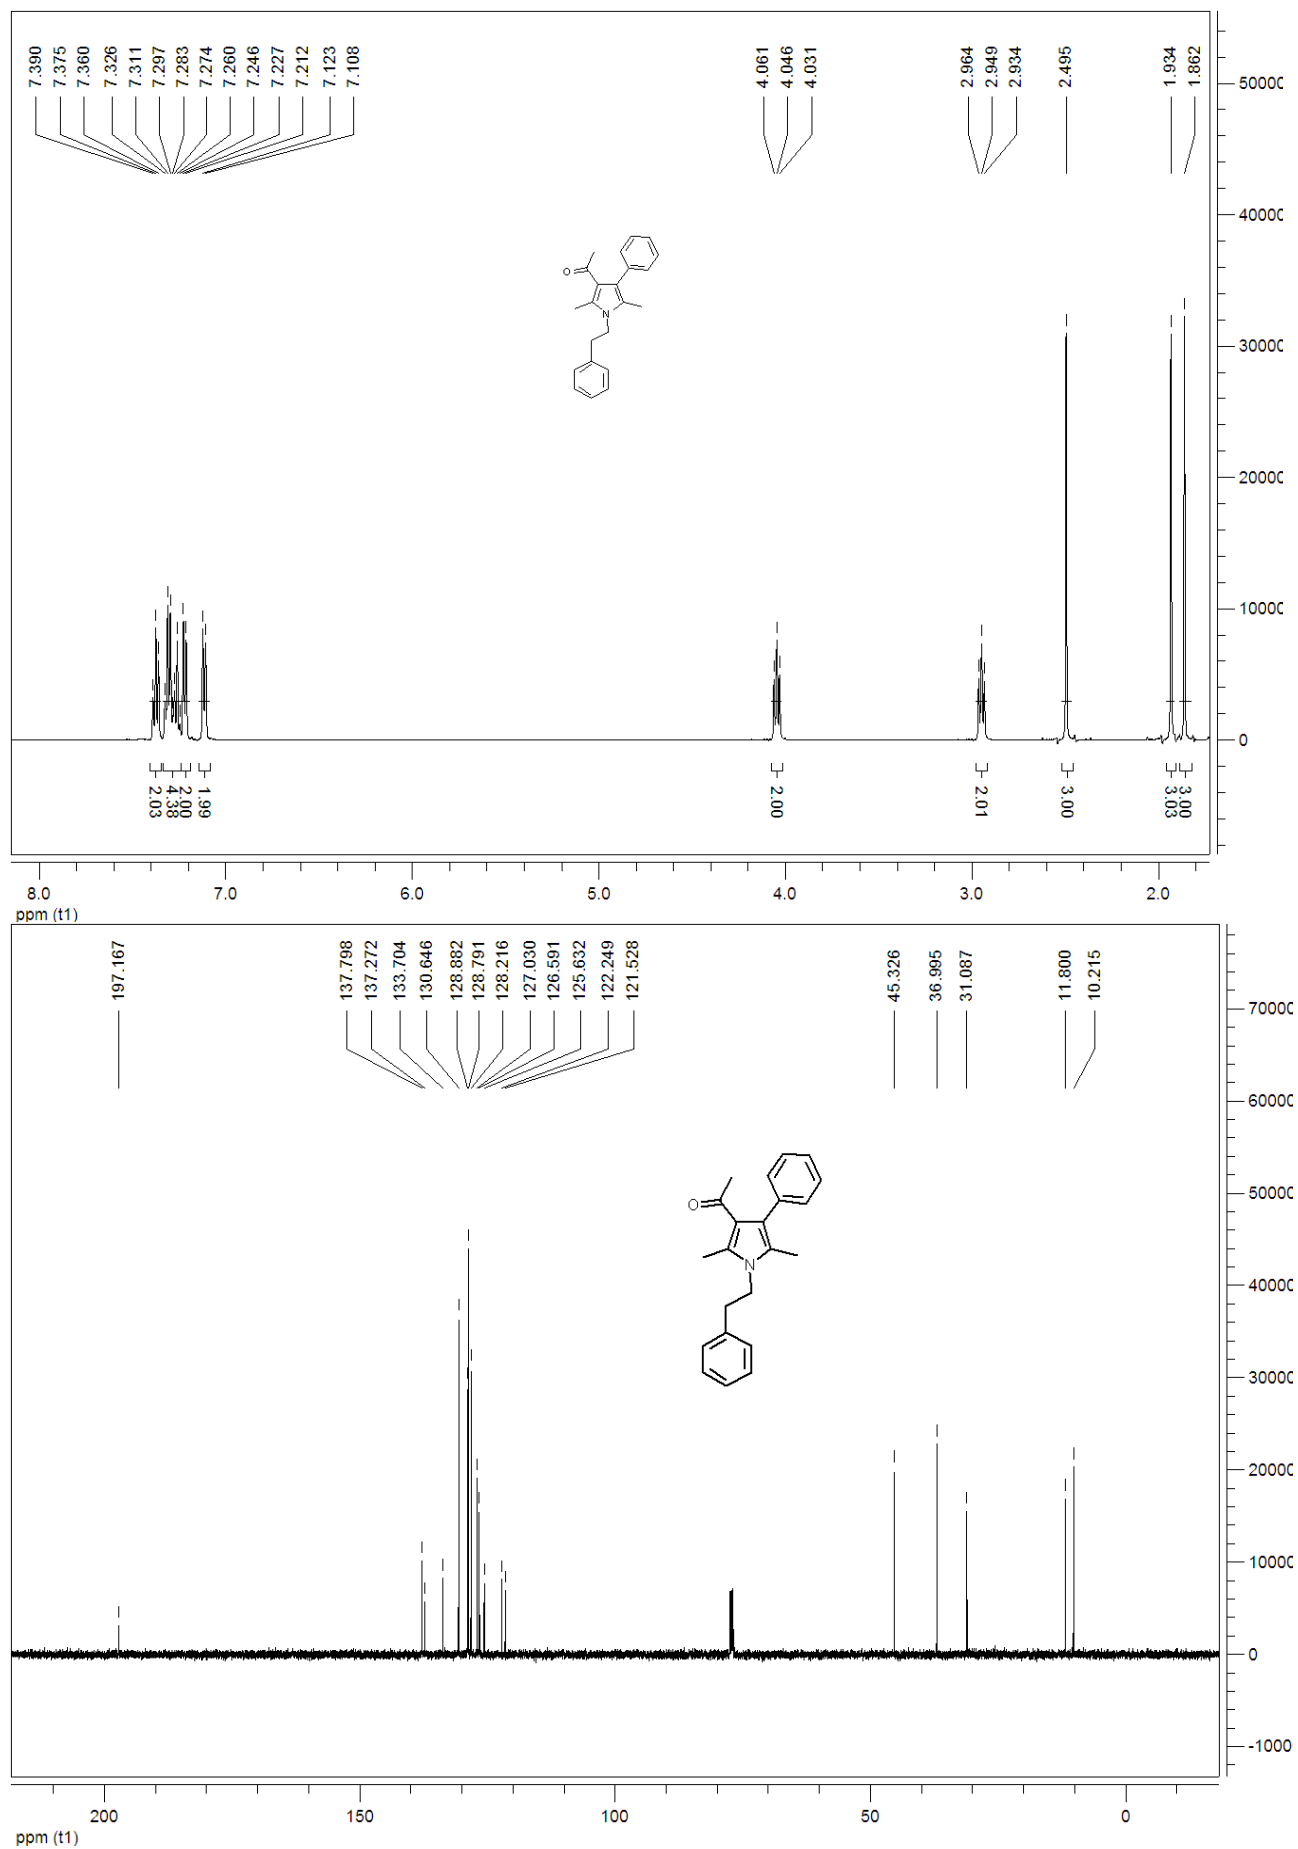

$^1\text{H}$  NMR and  $^{13}\text{C}$  NMR of compound **4ag**

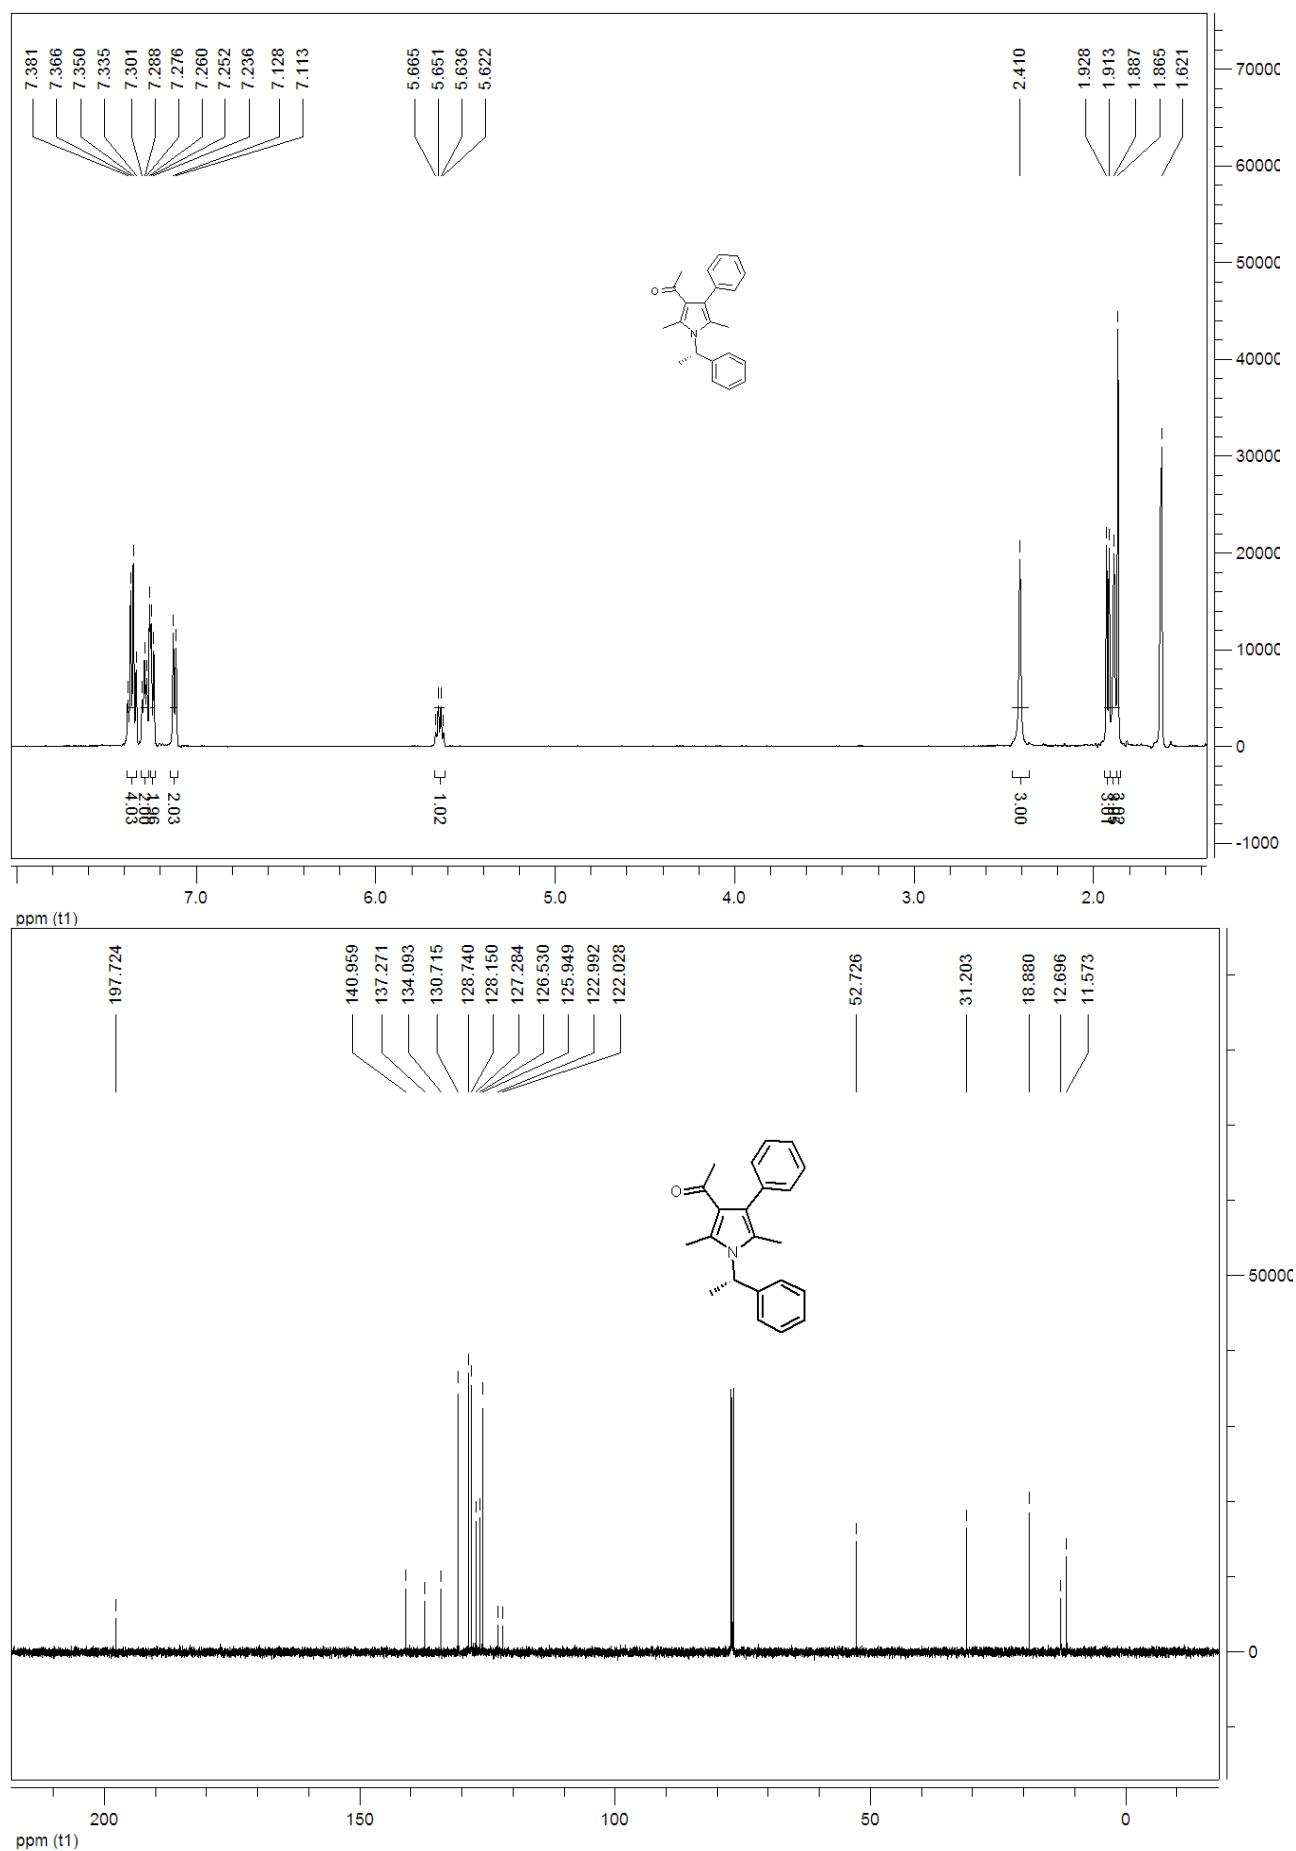

$^1\text{H}$  NMR and  $^{13}\text{C}$  NMR of compound **4ah**

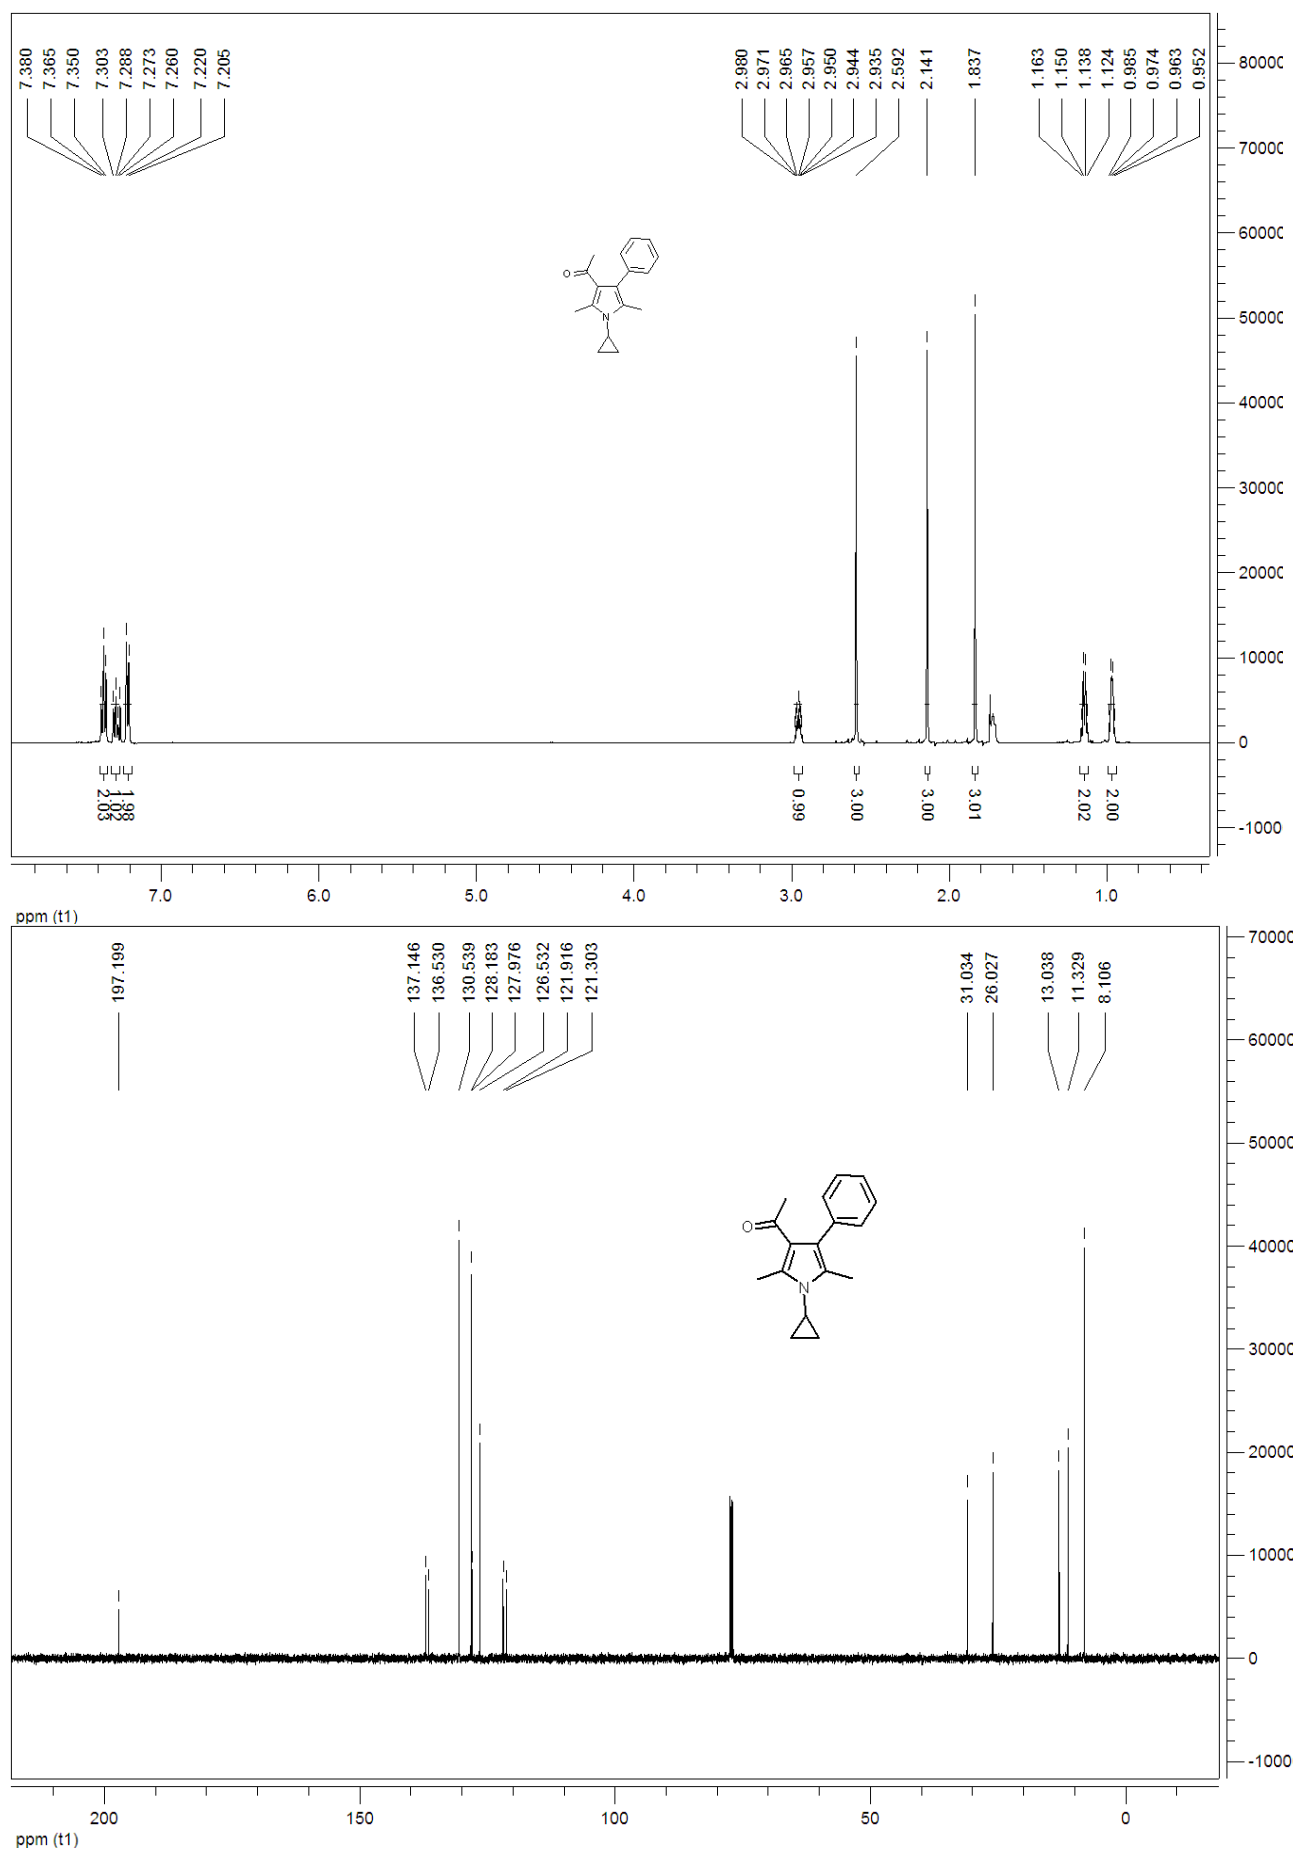

$^1\text{H}$  NMR and  $^{13}\text{C}$  NMR of compound **4ai**

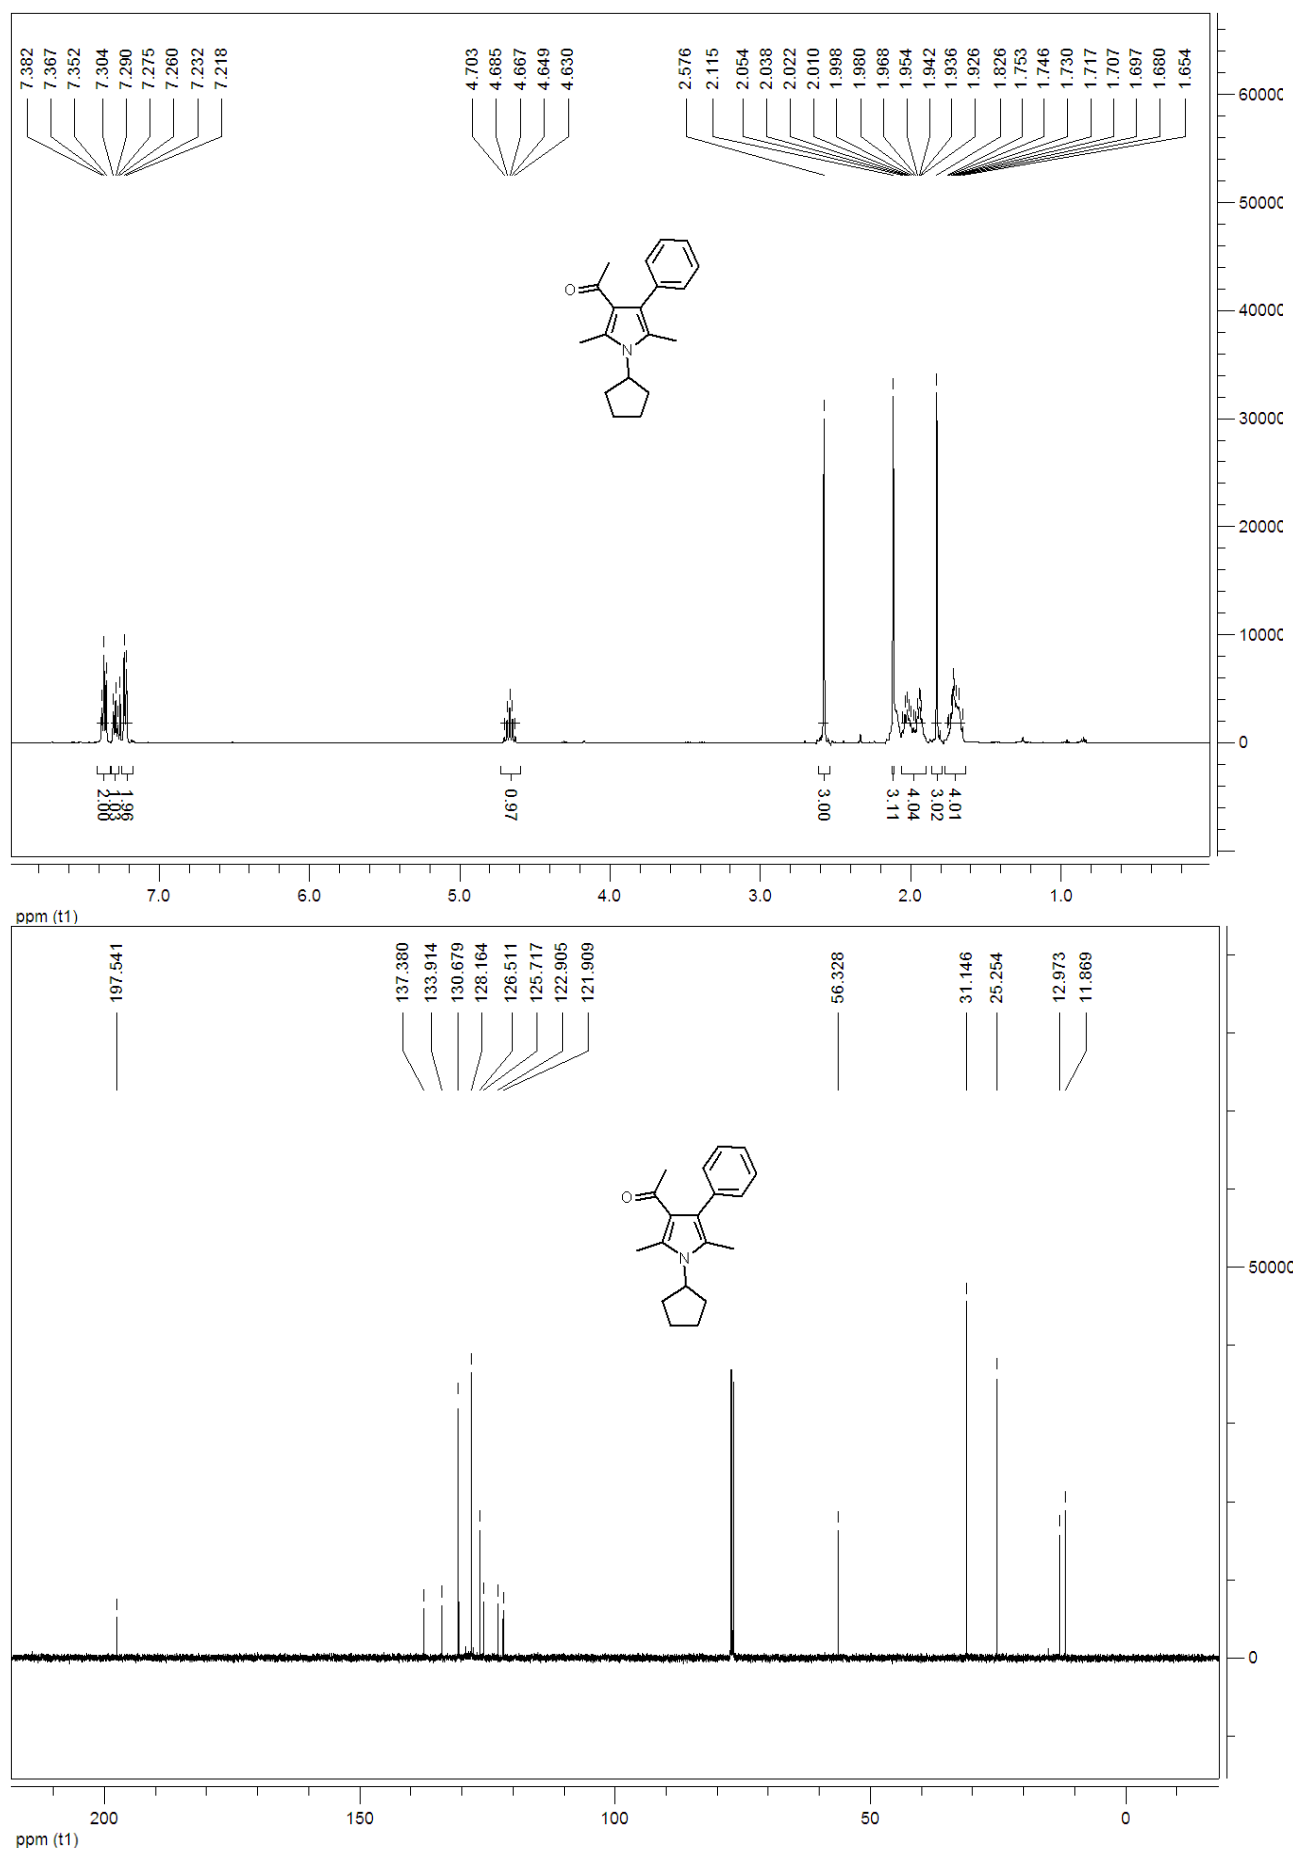

$^1\text{H}$  NMR and  $^{13}\text{C}$  NMR of compound **4aj**

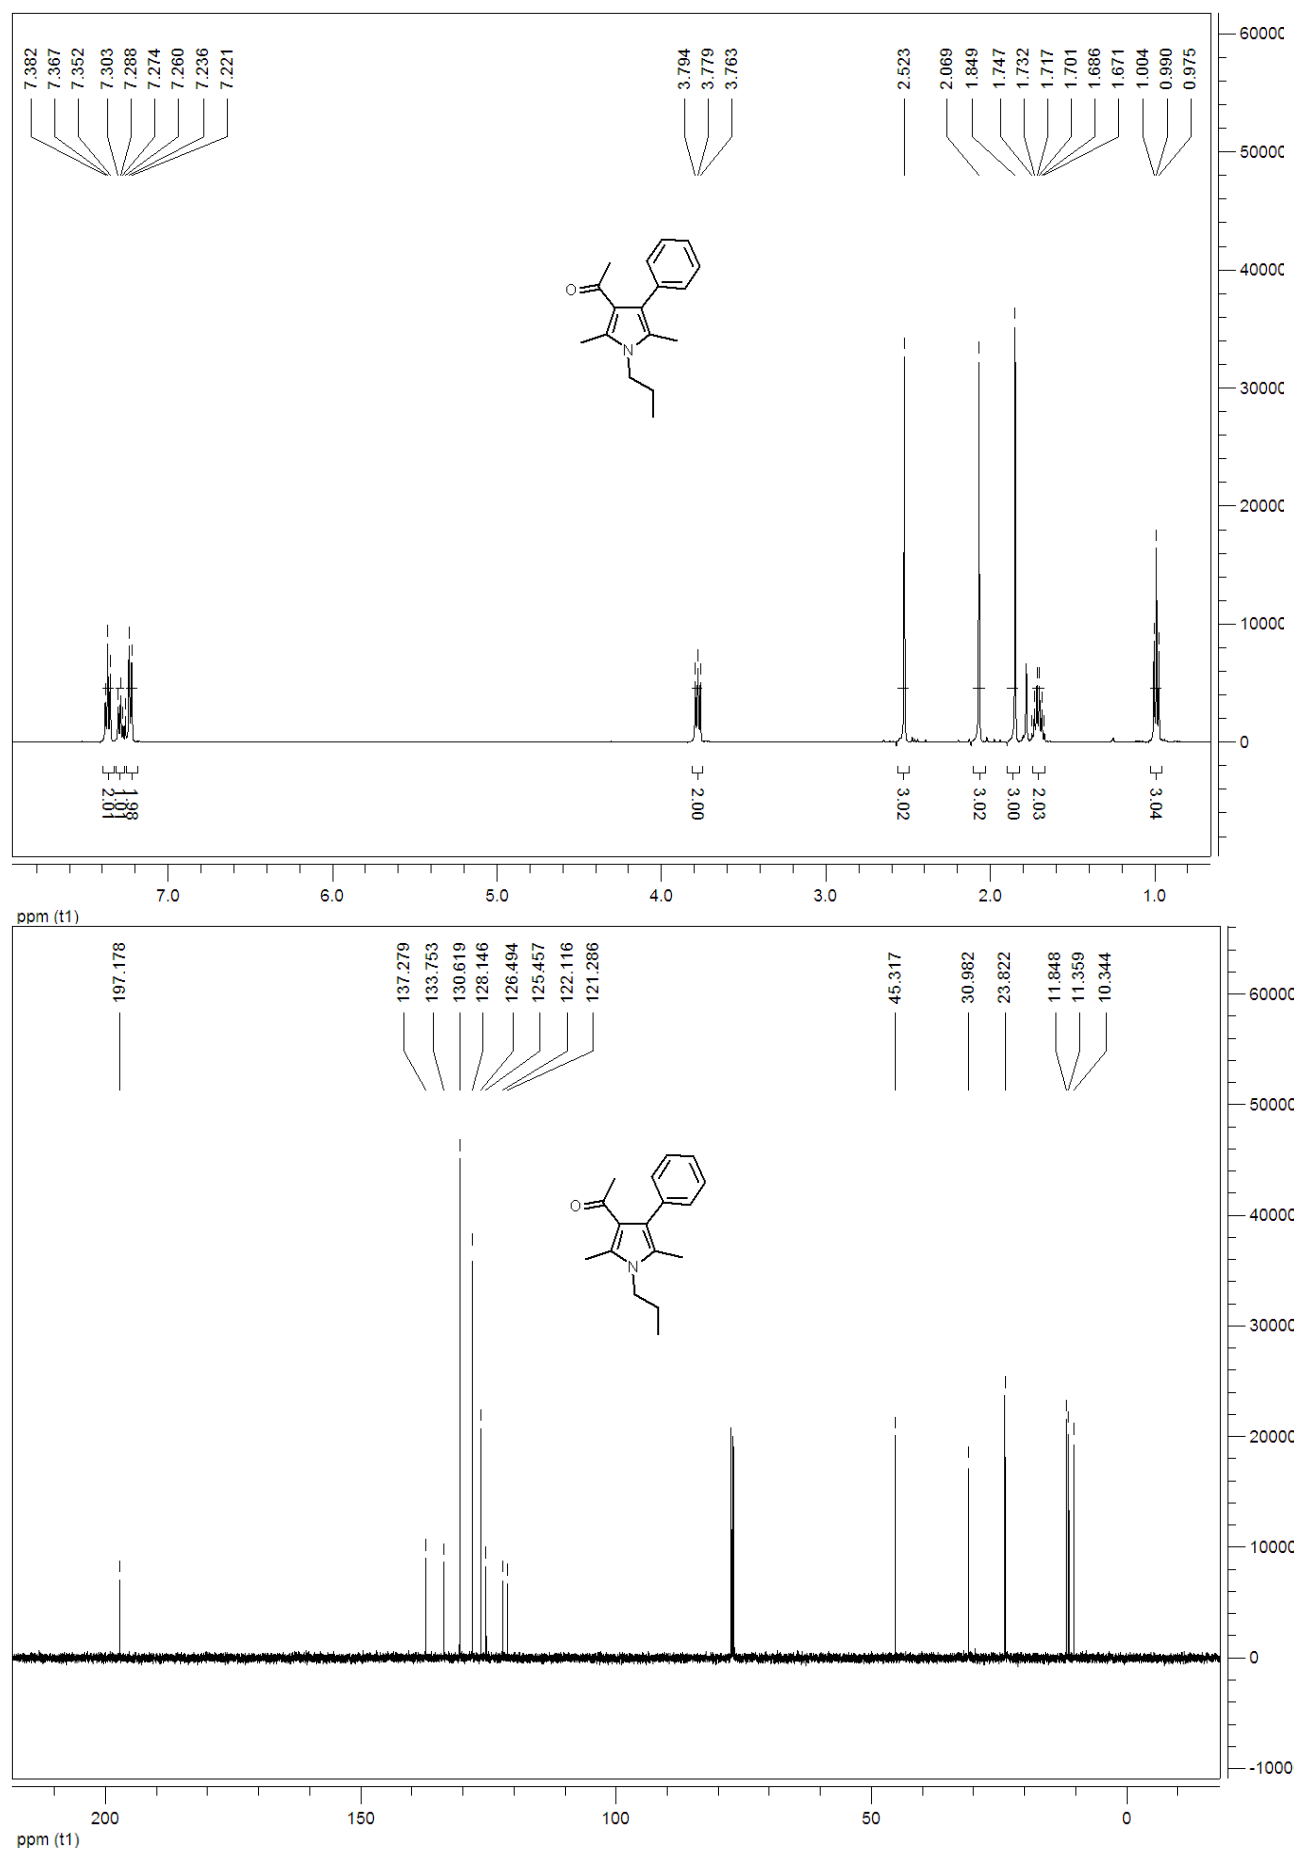

$^1\text{H}$  NMR and  $^{13}\text{C}$  NMR of compound **4ak**

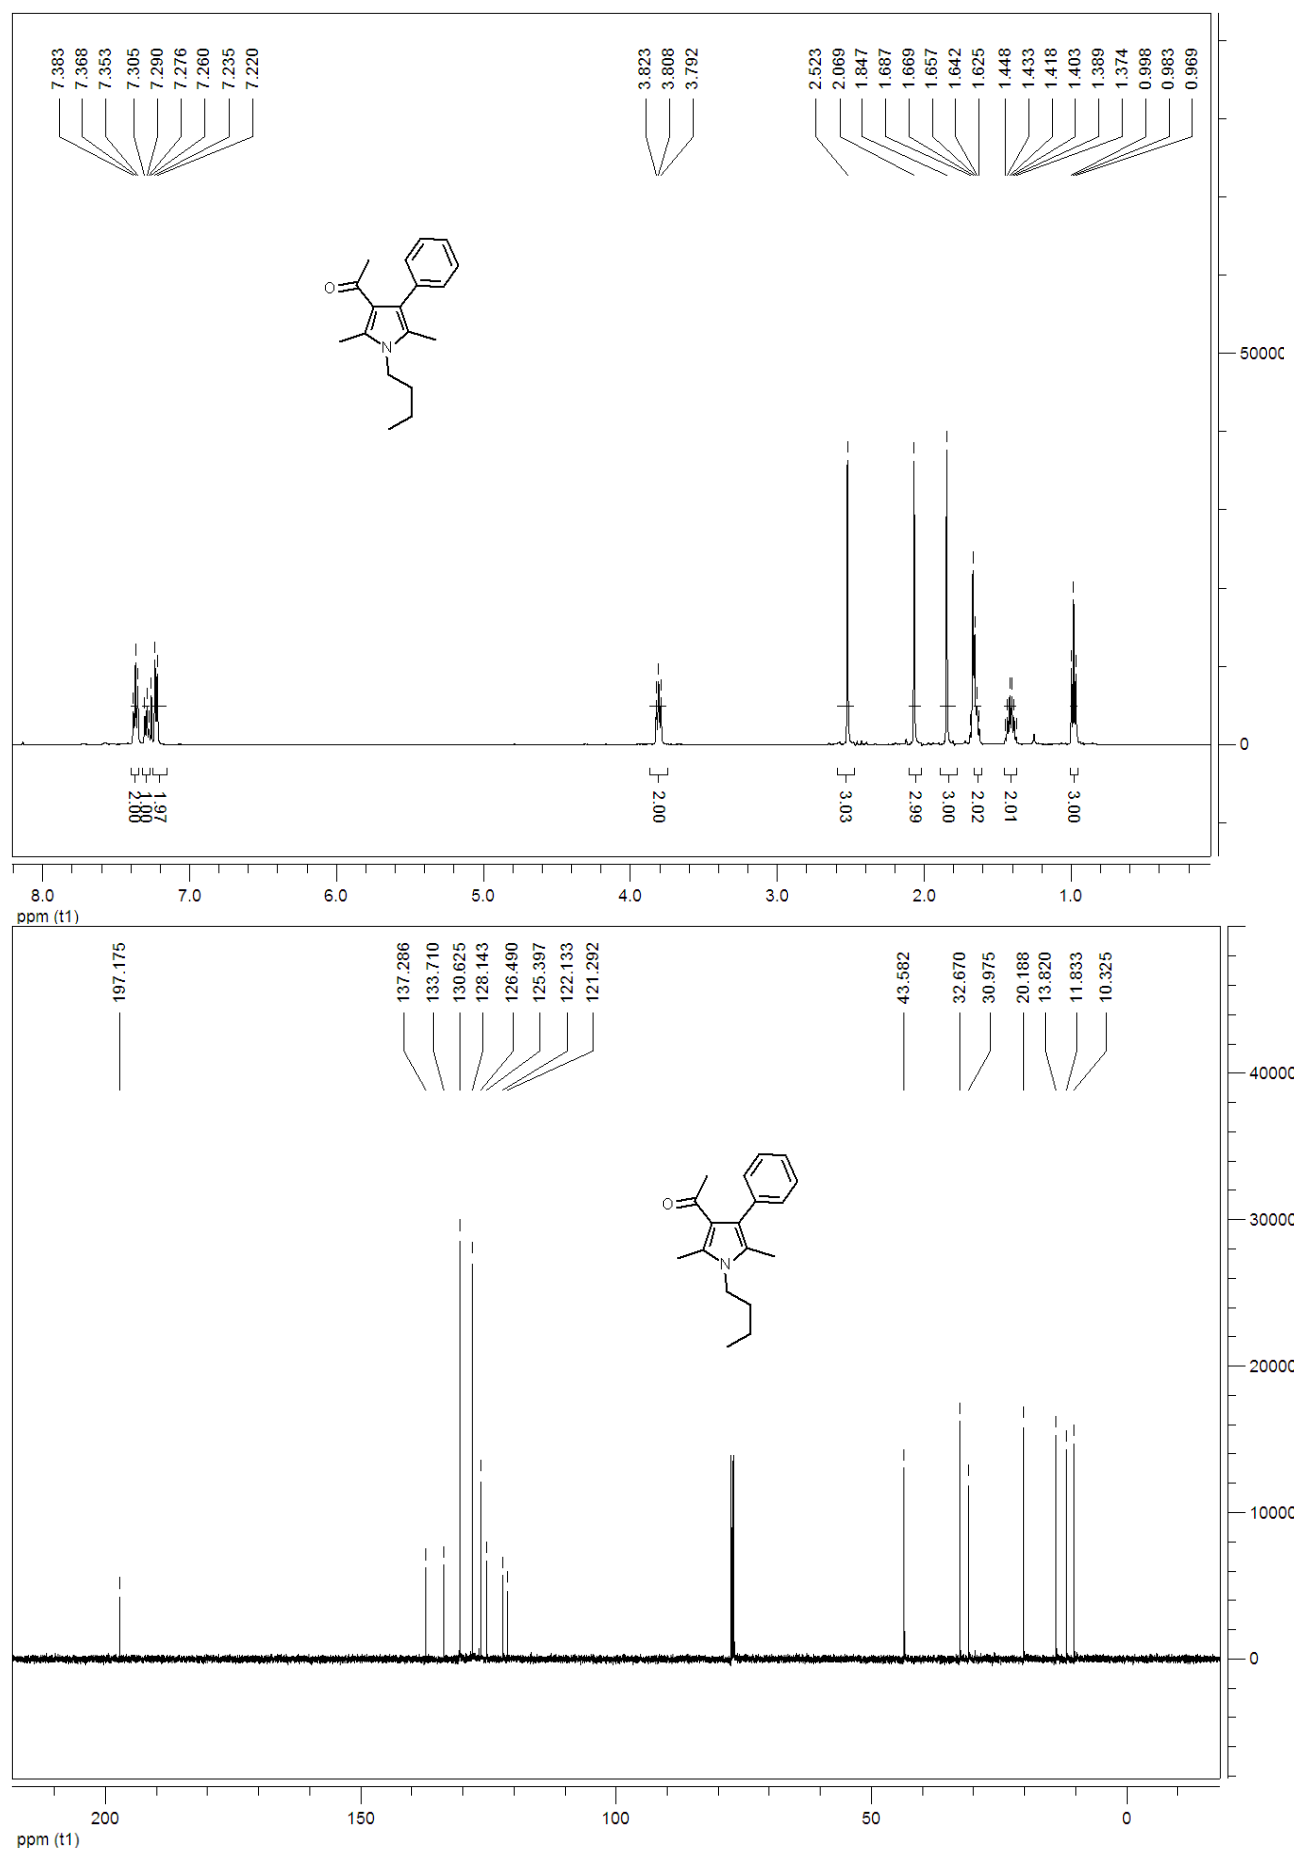

$^1\text{H}$  NMR and  $^{13}\text{C}$  NMR of compound **4al**

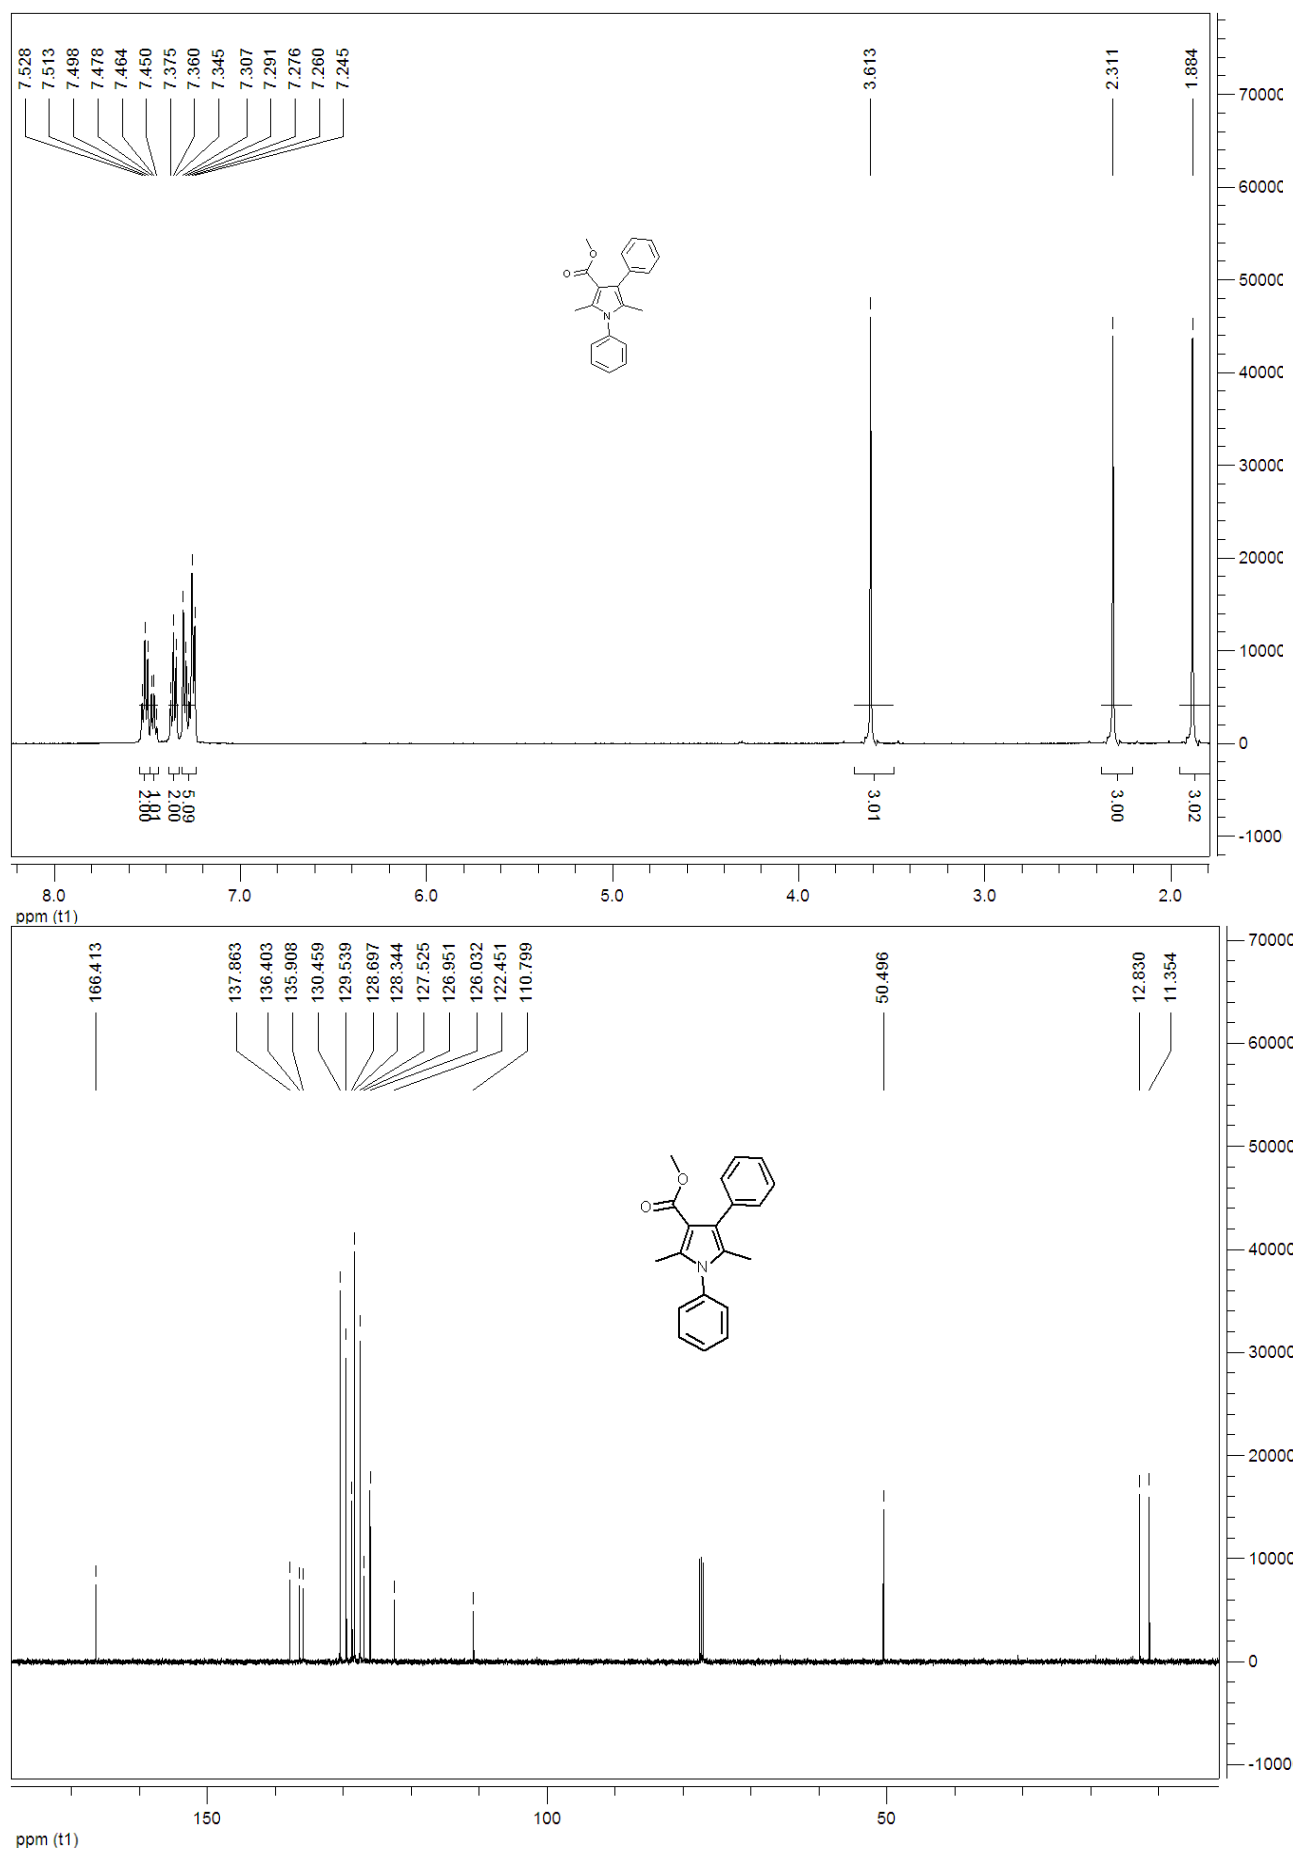

$^1\text{H}$  NMR and  $^{13}\text{C}$  NMR of compound **4am**

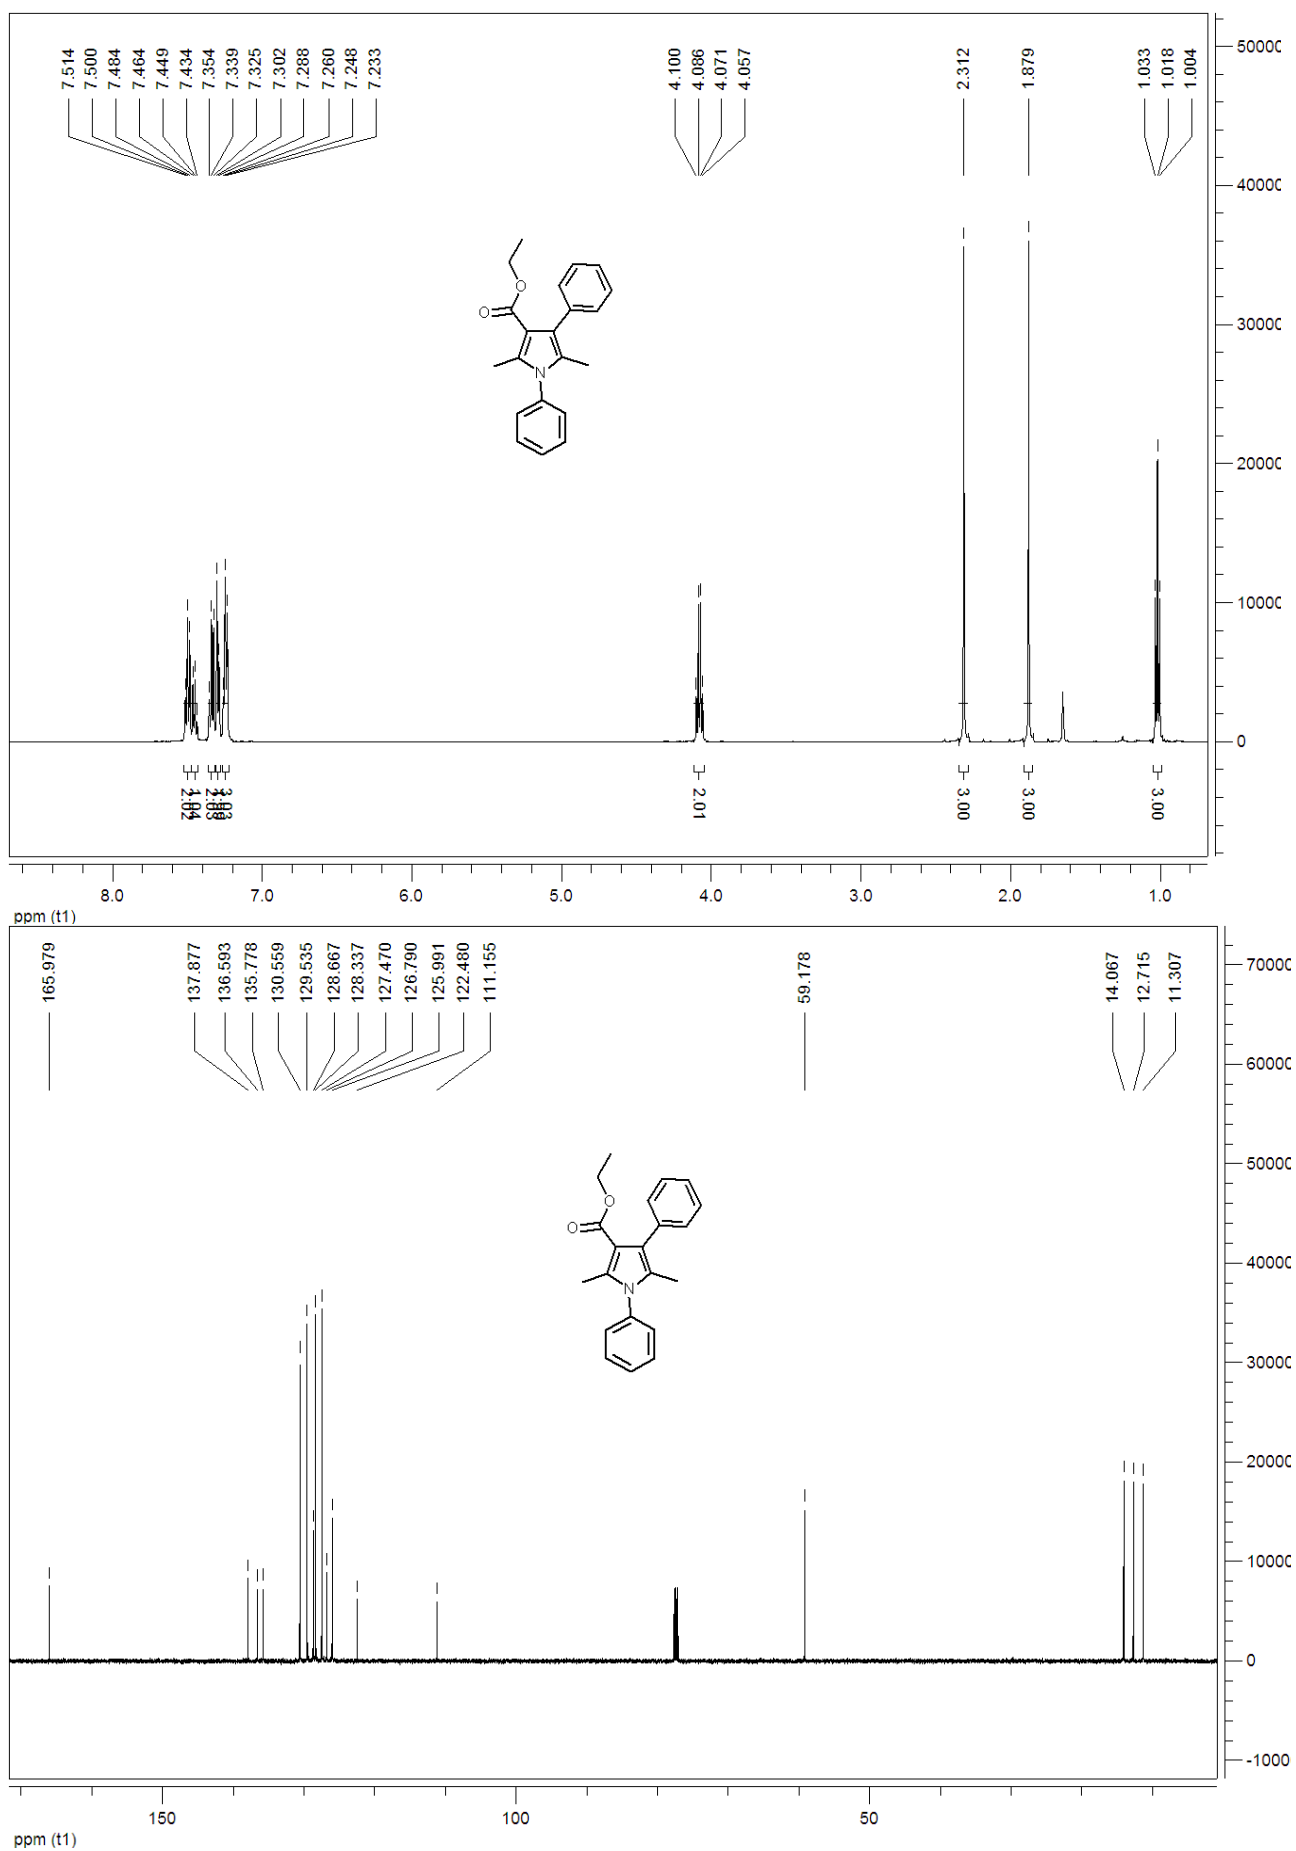

$^1\text{H}$  NMR and  $^{13}\text{C}$  NMR of compound **4an**

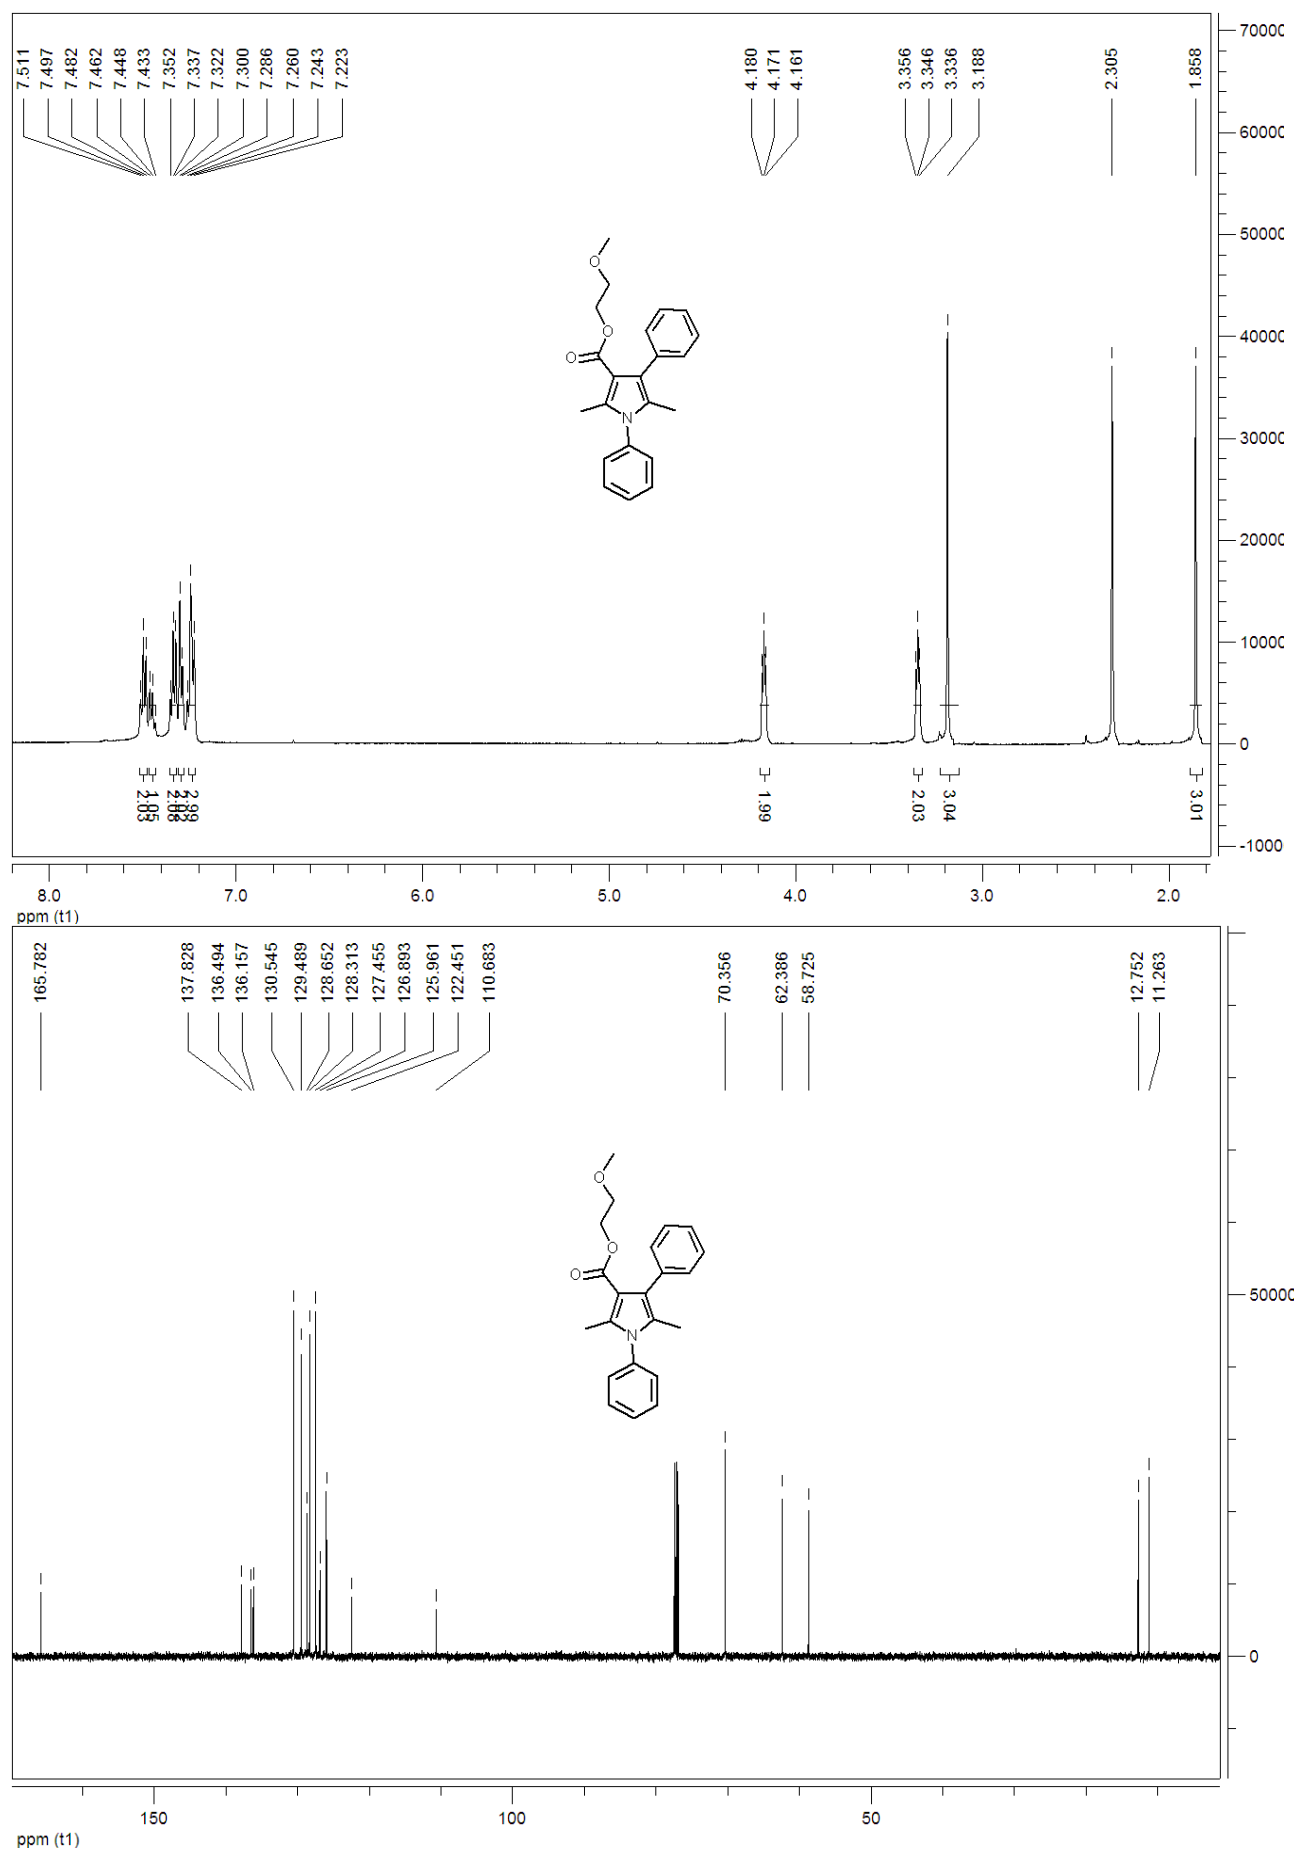

The figure displays two NMR spectra for compound 10, which is 2-(2-allyloxy-4-methyl-5-phenyl-1H-imidazol-1-yl)-1-phenylethane-1-one. The chemical structure is shown in the center of each spectrum.

**<sup>1</sup>H NMR Spectrum (Top):** The x-axis represents the chemical shift in ppm (t1), ranging from 8.0 to 1.5. The y-axis represents intensity, ranging from -1000 to 7000. The spectrum shows several multiplets in the aromatic region (6.8-7.6 ppm) and two singlets in the aliphatic region (2.3 and 1.9 ppm). Integration values are provided below the peaks.

| Chemical Shift (ppm)                                   | Integration |
|--------------------------------------------------------|-------------|
| 7.528, 7.514, 7.498, 7.478, 7.464, 7.449               | 1.83        |
| 7.363, 7.348, 7.333, 7.312, 7.298, 7.260, 7.254, 7.245 | 3.81        |
| 5.762, 5.752, 5.741, 5.730, 5.717, 5.707, 5.696, 5.685 | 0.96        |
| 5.028, 5.007, 4.992, 4.989                             | 0.92        |
| 4.958, 4.955, 4.954, 4.554                             | 2.01        |
| 2.326                                                  | 3.00        |
| 1.881                                                  | 3.02        |

**<sup>13</sup>C NMR Spectrum (Bottom):** The x-axis represents the chemical shift in ppm (t1), ranging from 150 to 10. The y-axis represents intensity, ranging from -1000 to 6000. The spectrum shows a large cluster of peaks in the aromatic region (110-138 ppm), a single peak at 64.105 ppm, and two peaks in the aliphatic region (12.8 and 11.3 ppm).

| Chemical Shift (ppm)                                                                                                         |
|------------------------------------------------------------------------------------------------------------------------------|
| 165.615                                                                                                                      |
| 137.841, 136.476, 136.121, 132.663, 130.512, 129.520, 128.683, 128.328, 127.560, 126.957, 126.041, 122.465, 116.897, 110.777 |
| 64.105                                                                                                                       |
| 12.819, 11.293                                                                                                               |

$^1\text{H}$  NMR and  $^{13}\text{C}$  NMR of compound **4ap**

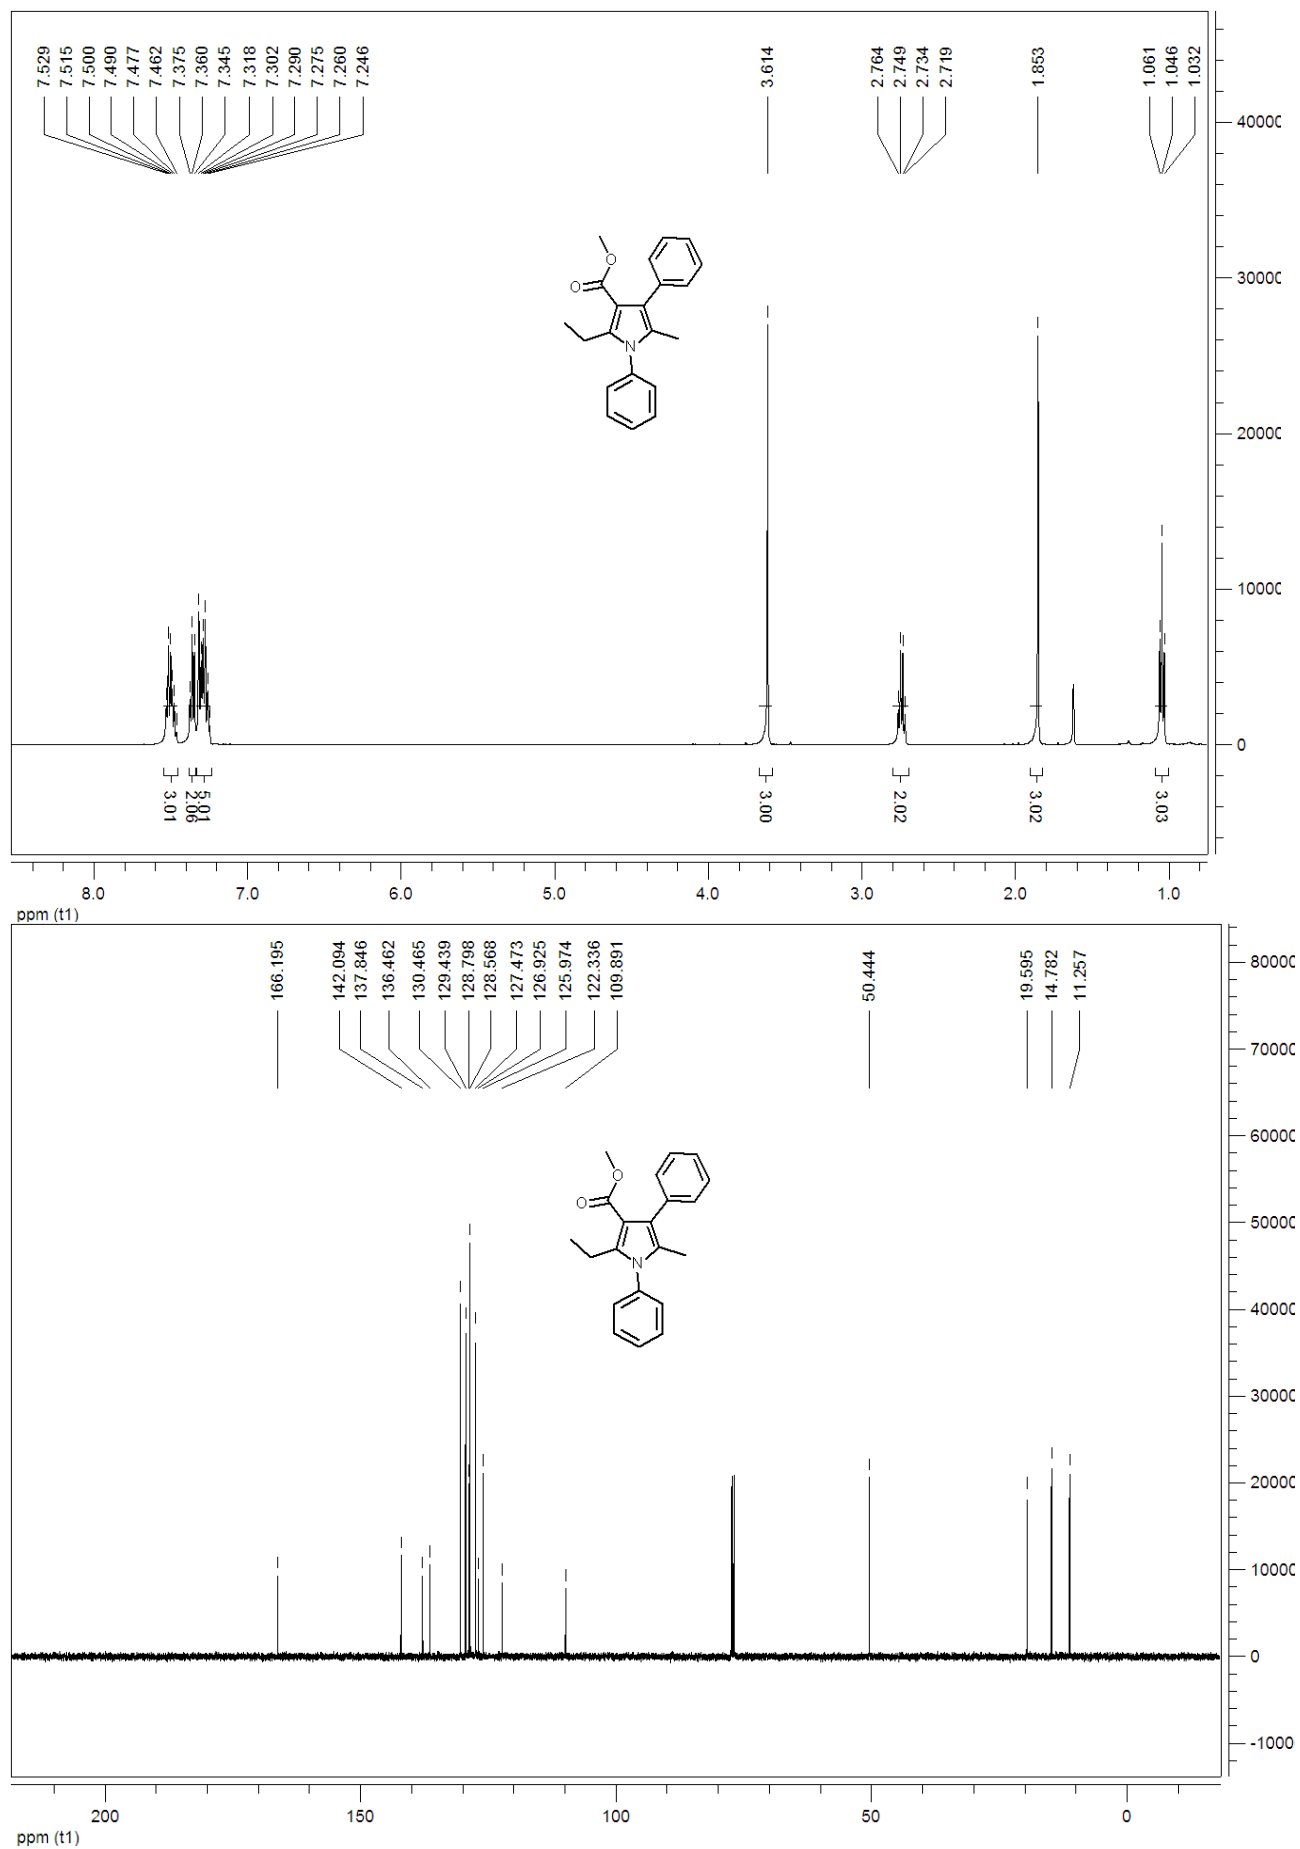

$^1\text{H}$  NMR and  $^{13}\text{C}$  NMR of compound **4aq**

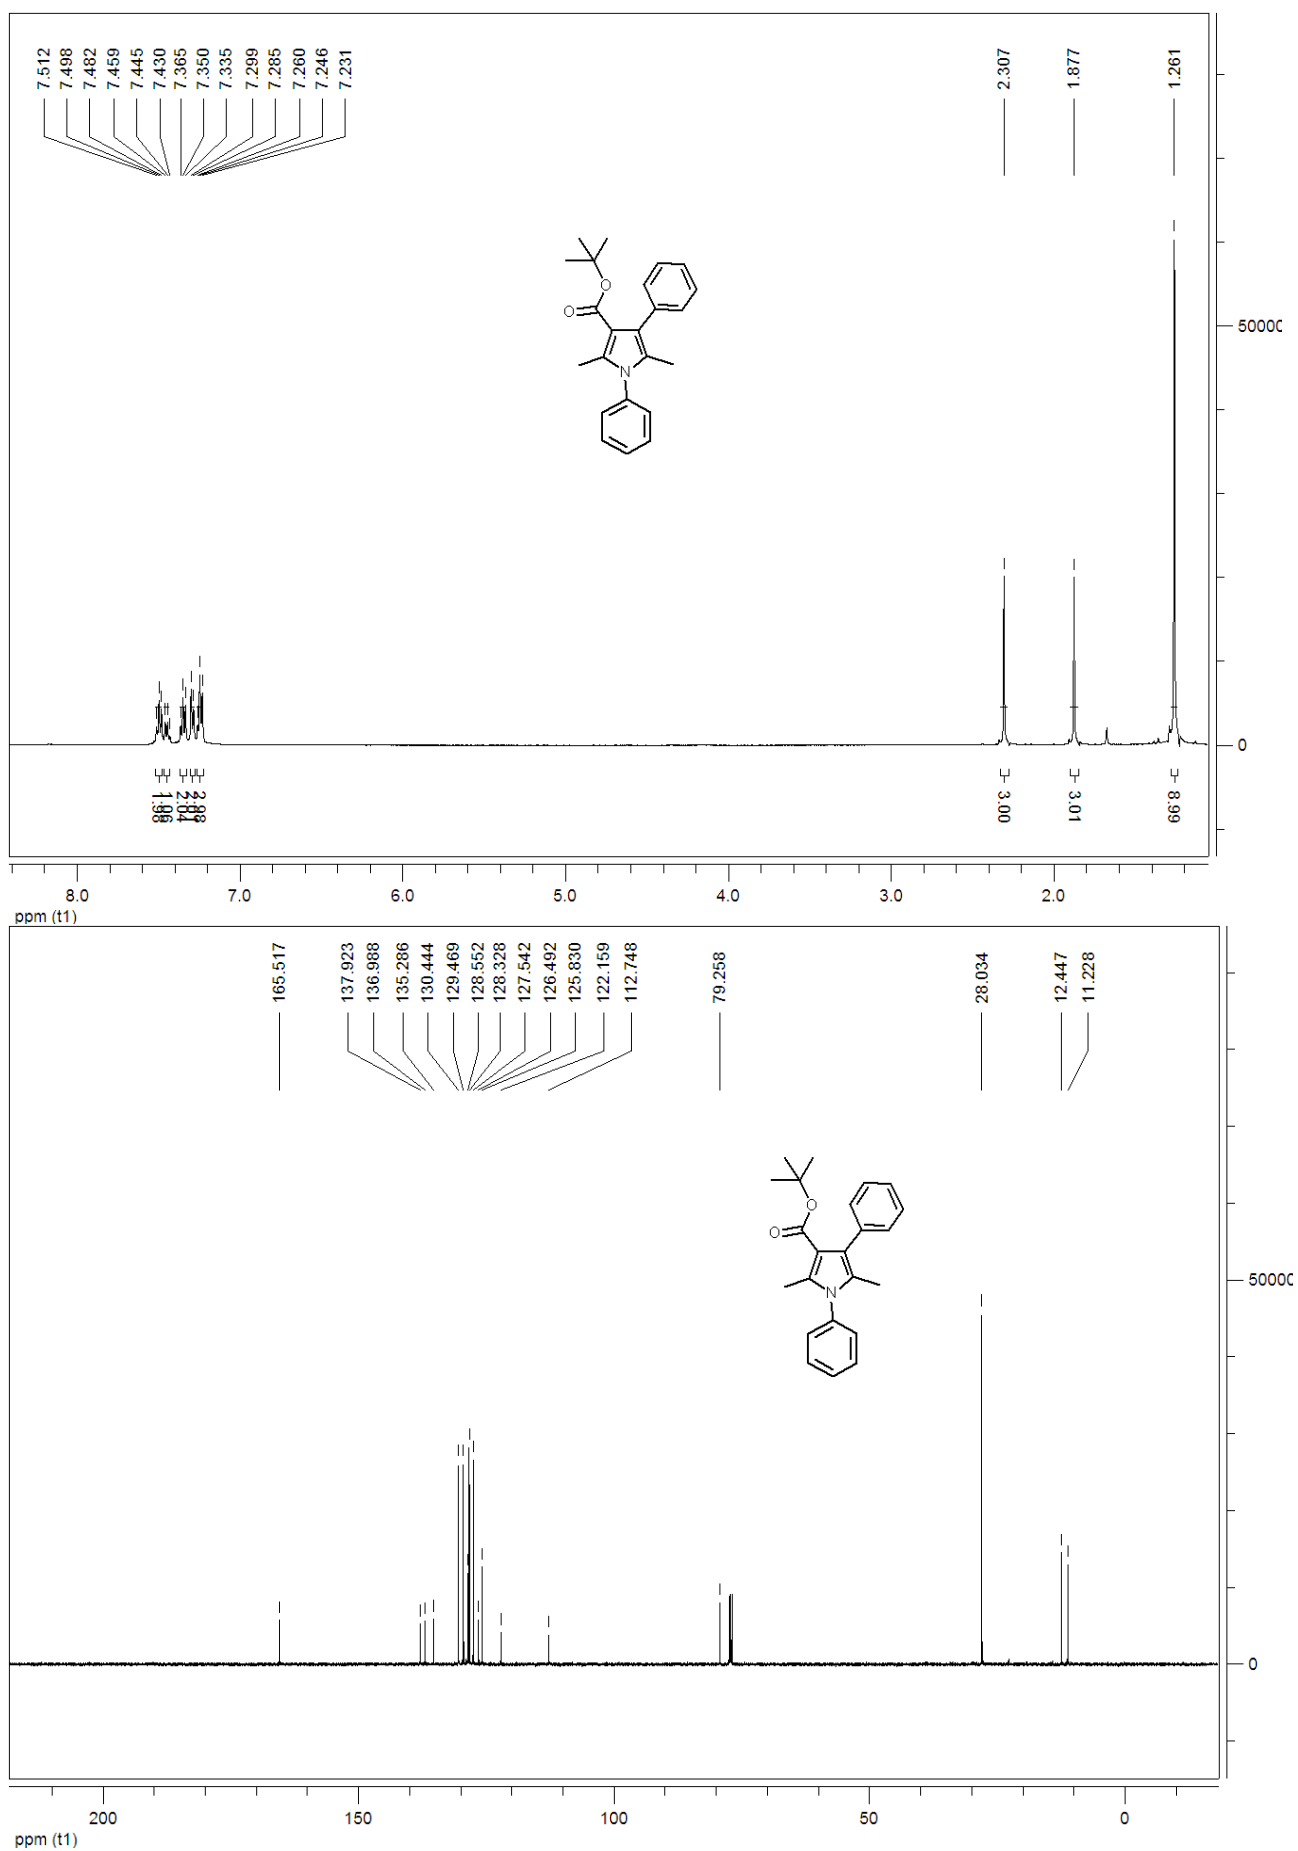

$^1\text{H}$  NMR and  $^{13}\text{C}$  NMR of compound **4ar**

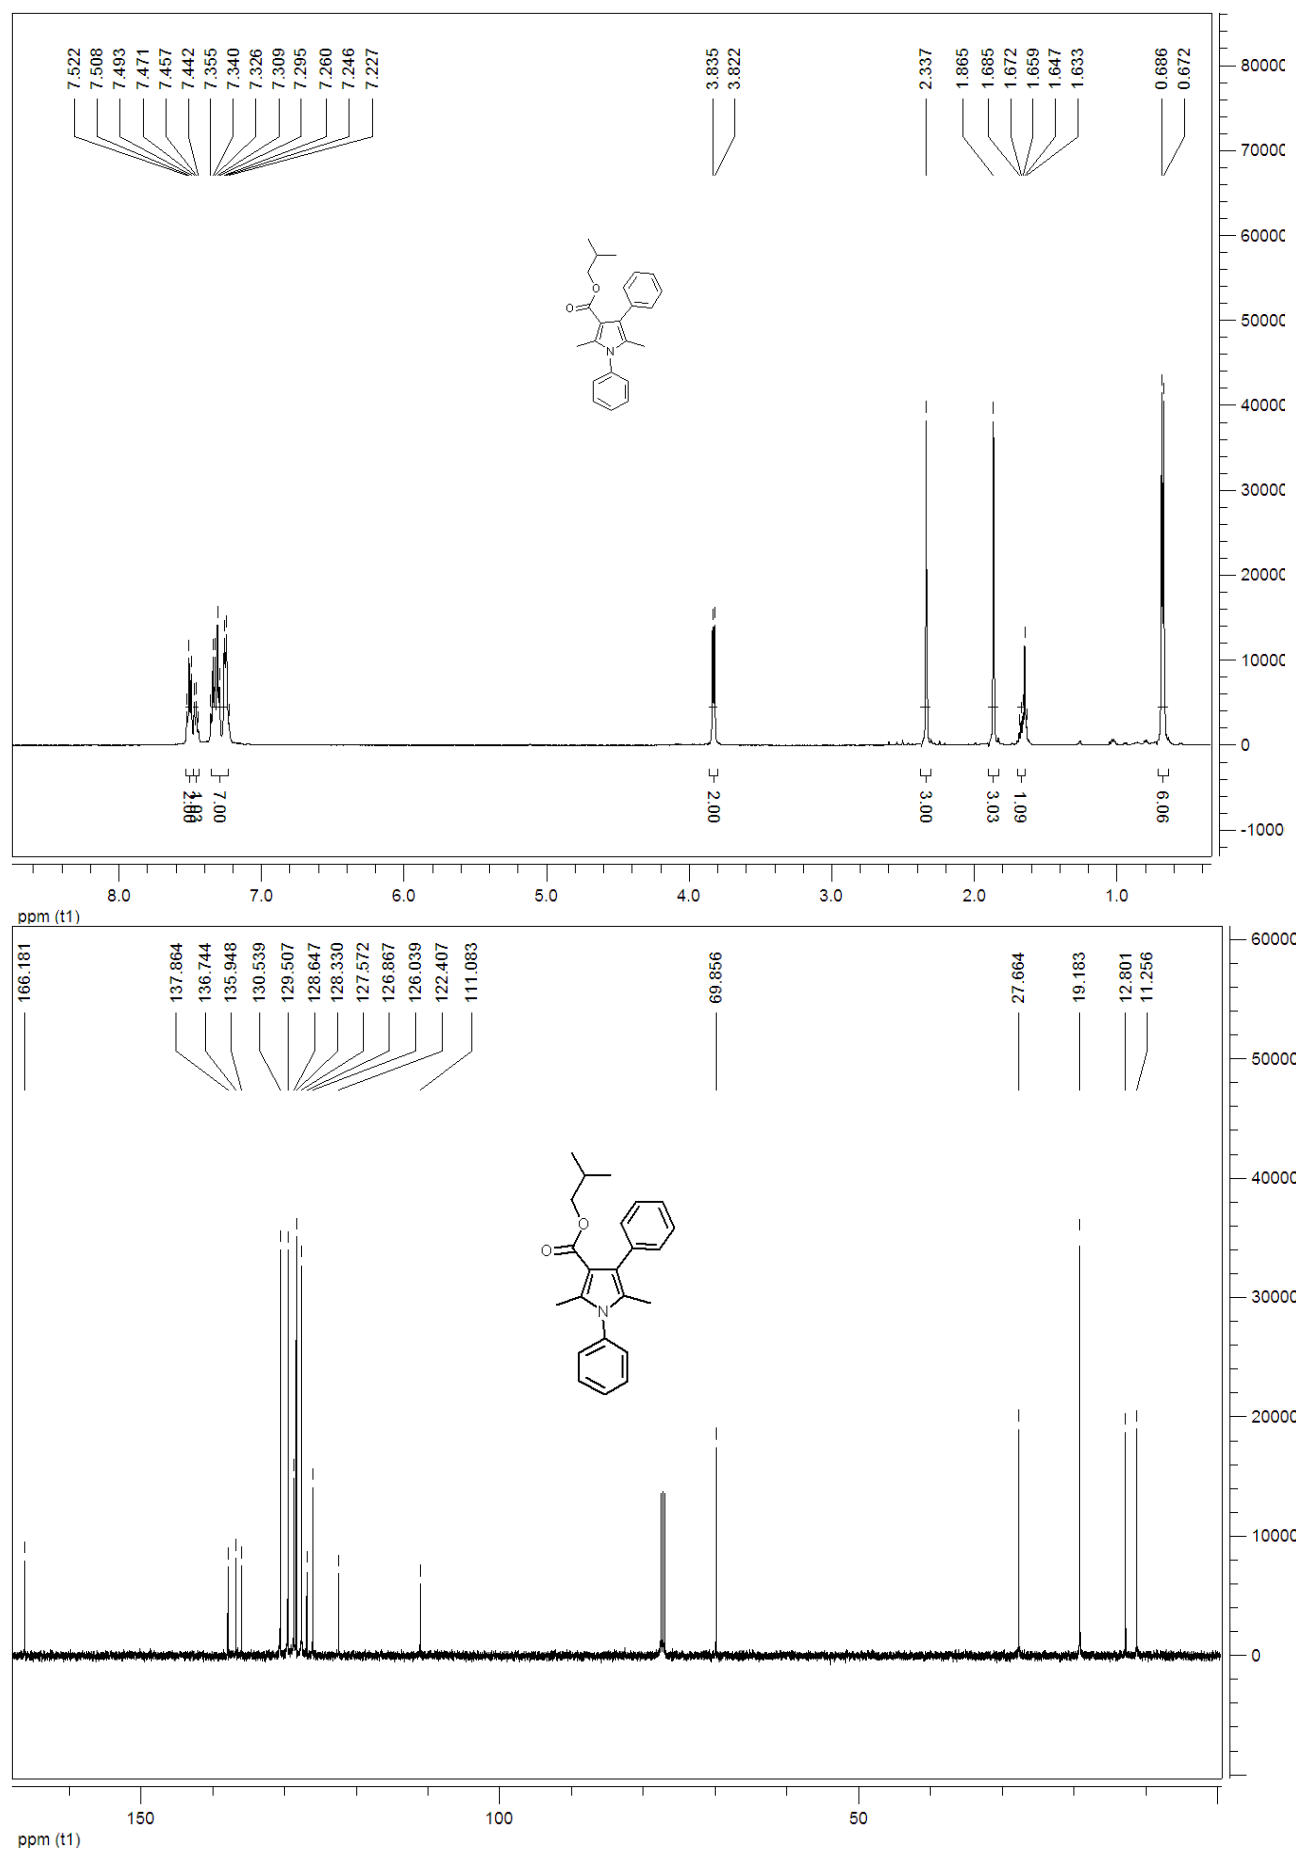

$^1\text{H}$  NMR and  $^{13}\text{C}$  NMR of compound **4as**

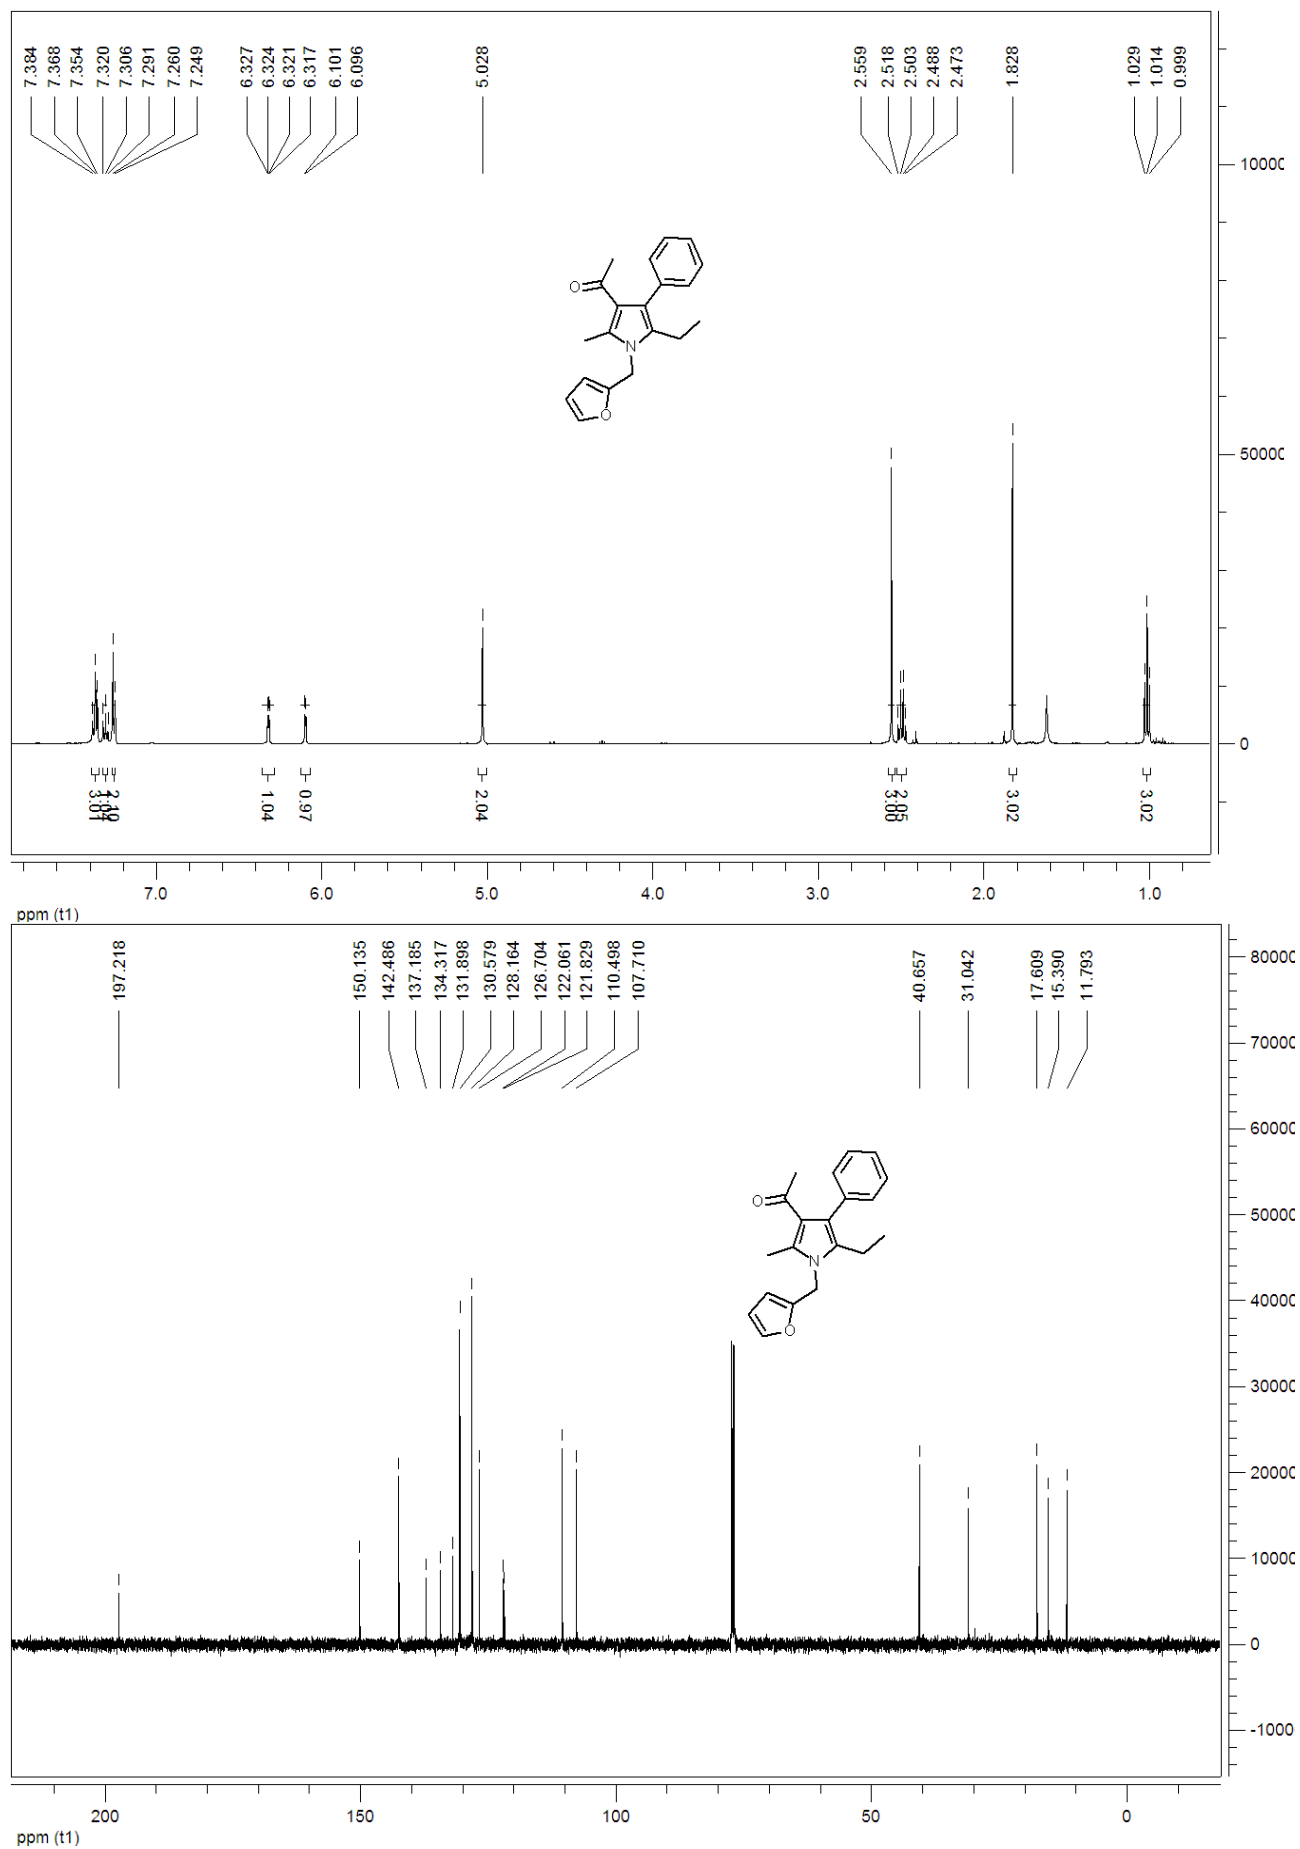

$^1\text{H}$  NMR and  $^{13}\text{C}$  NMR of compound **4at**

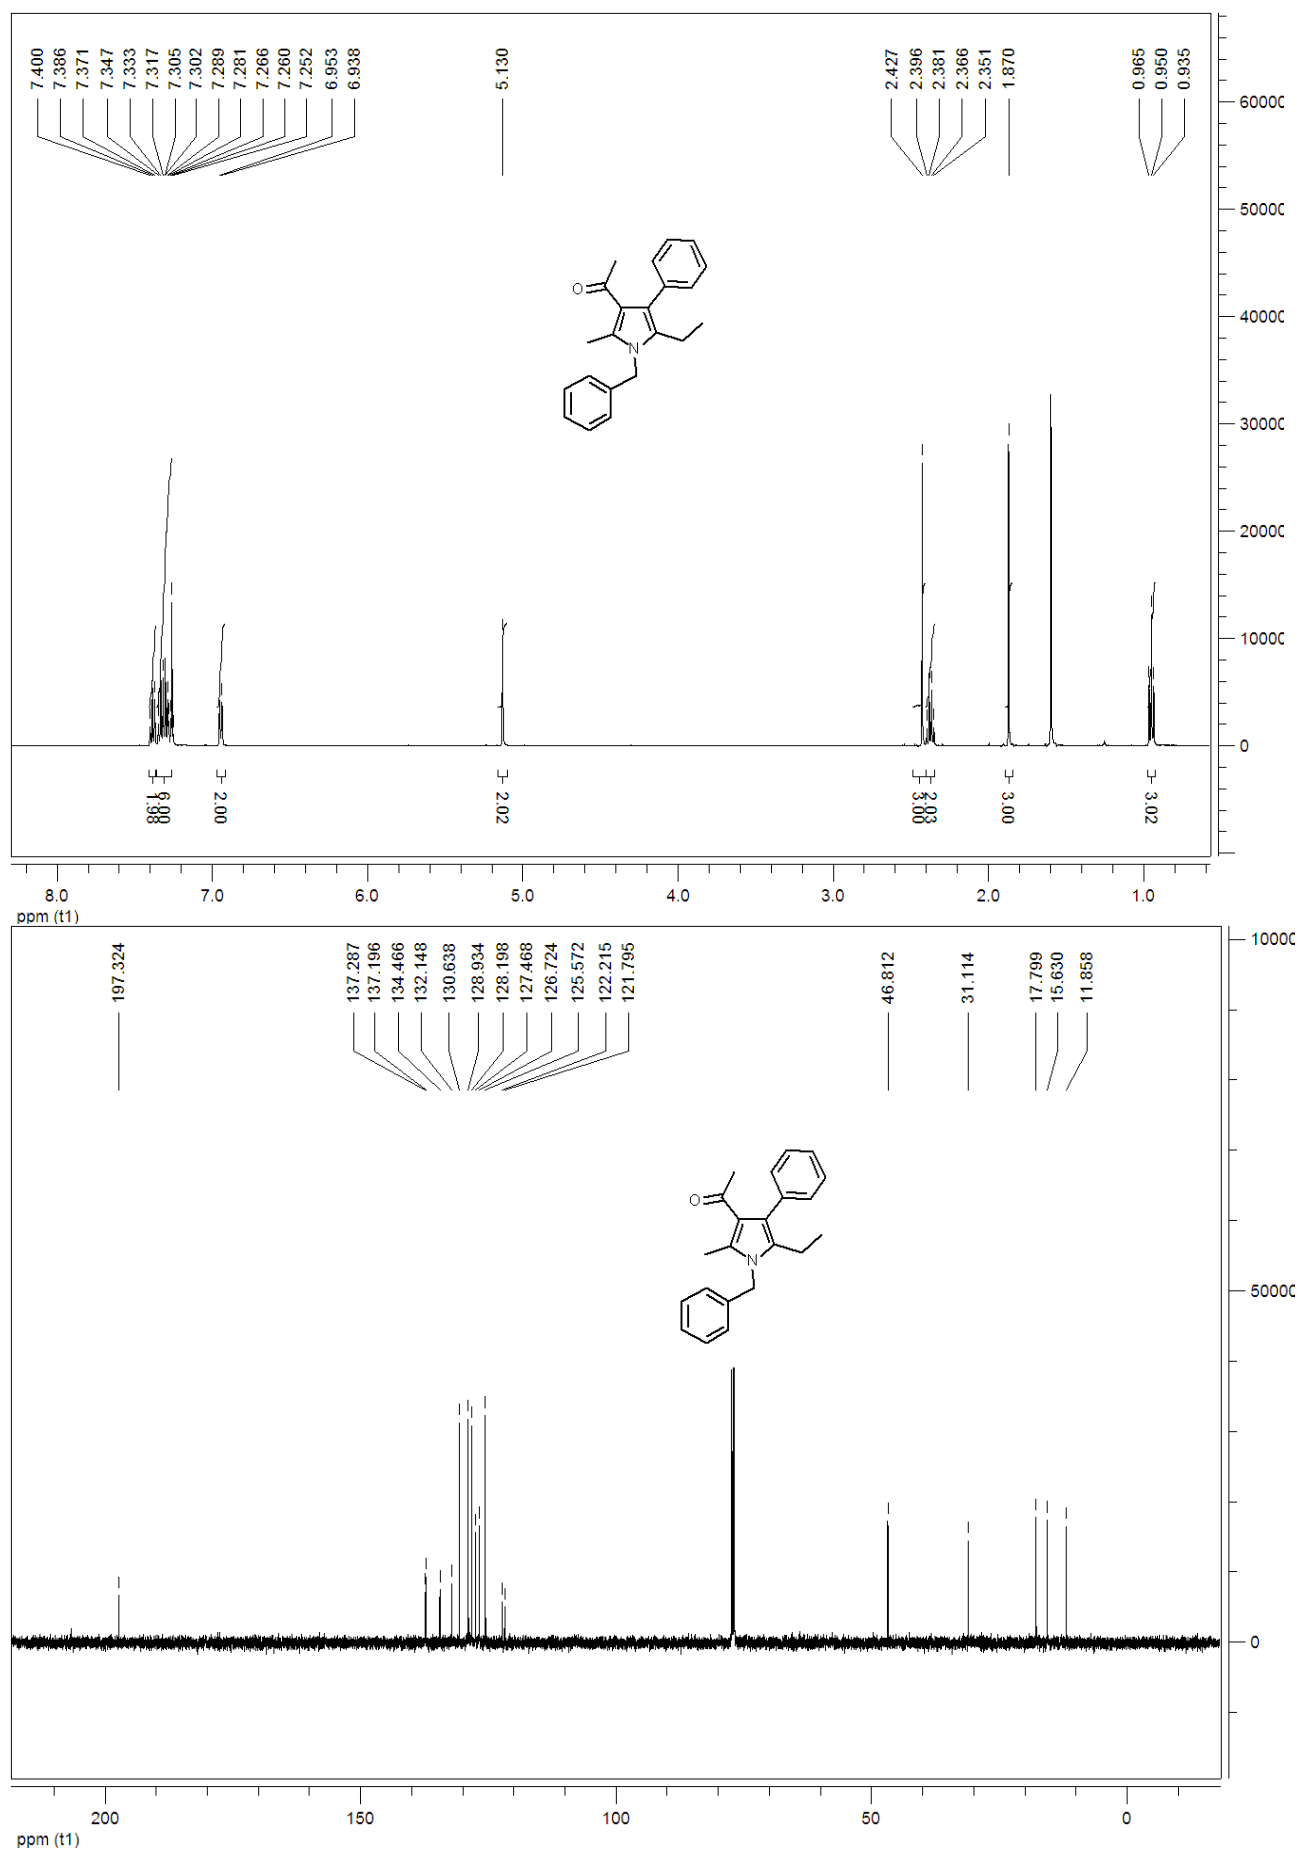

$^1\text{H}$  NMR and  $^{13}\text{C}$  NMR of compound **4au**

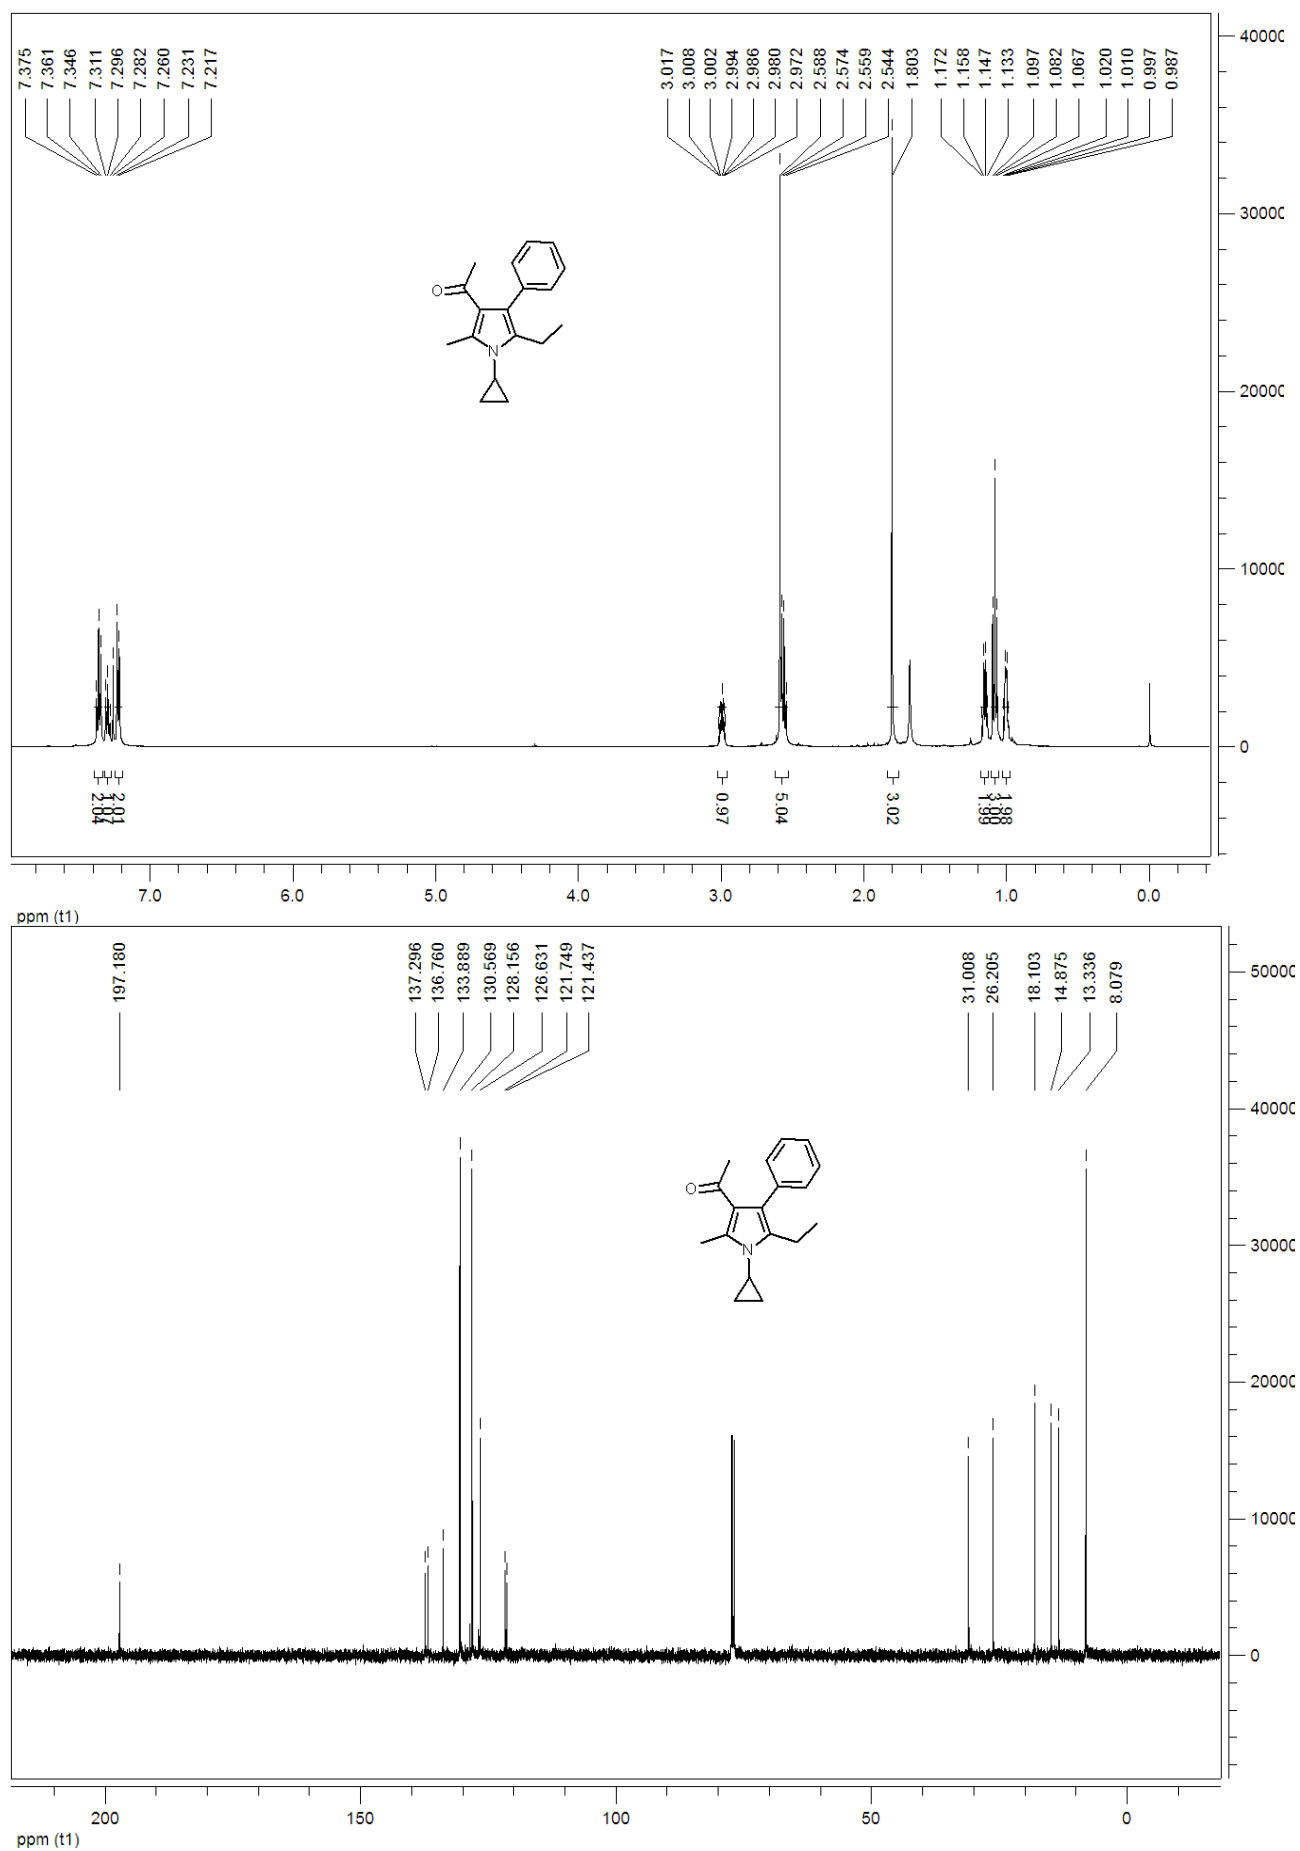

$^1\text{H}$  NMR and  $^{13}\text{C}$  NMR of compound **4av**

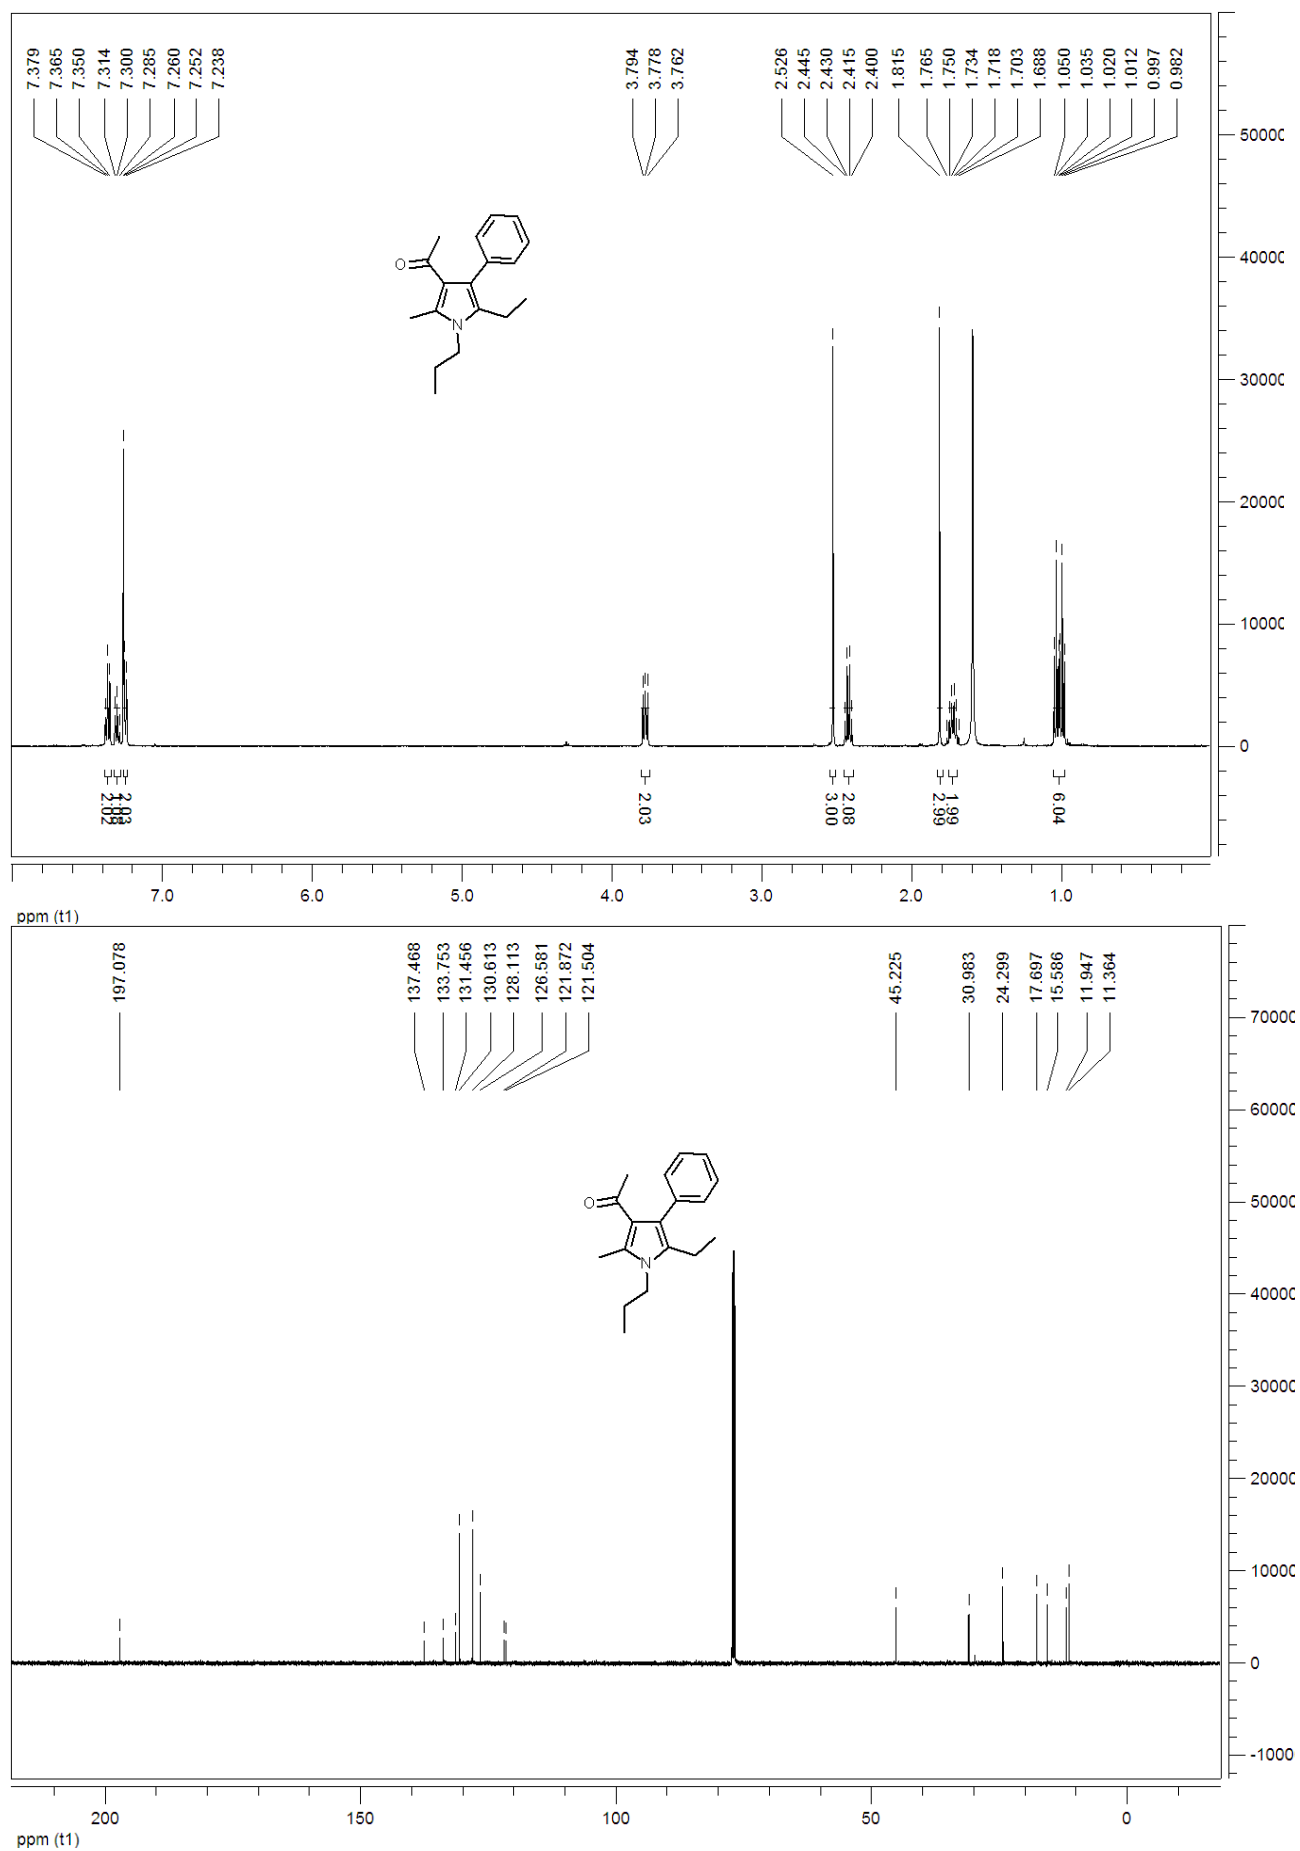

Supplement: c3ra47855f1.pdf [file c3ra47855f1.pdf]
